# Supplementary material
Source: Research Square preprint supplement (doi:10.21203/rs.3.rs-8928353/v1)
Supplement: Supplementary file 2 [file 1ea49851bb8959536185b286.xlsx]

## Sheet: 2-ΔCт模版  1 C作对照
Well	Well Position	Sample Name	Target Name	CT	Ct Mean	Ct SD					Sample Name	Target Name	CT	mean	ΔCт	mean	ΔΔCт	2-ΔΔCт	mean	相对量计算	mean	SD
1	A1	5.12EV71 48-6	GAPDH	12.371	12.344	0.028					5.12EV71 C1	VP1	23.829	23.9343	11.7603	11.8657	-0.105333	1.07574		0.00011064	0.000103658	1.53771e-05
2	A2	5.12EV71 48-6	GAPDH	12.315	12.344	0.028					5.12EV71 C1	VP1	23.782		11.7133		-0.152333	1.11137		0.000114304
3	A3	5.12EV71 48-6	GAPDH	12.346	12.344	0.028					5.12EV71 C1	VP1	24.192		12.1233		0.257667	0.83644		8.6028e-05
4	A4	5.12EV71 48-6	VP1	11.184	11.208	0.096					5.12EV71 C1	GAPDH	12.146	12.0687
5	A5	5.12EV71 48-6	VP1	11.127	11.208	0.096					5.12EV71 C1	GAPDH	12.021
6	A6	5.12EV71 48-6	VP1	11.314	11.208	0.096					5.12EV71 C1	GAPDH	12.039
7	A7	5.12EV71 48D-160	GAPDH	12.73	12.726	0.058					5.12EV71 V3	VP1	11.01	11.057	-1.426		-13.2917	10027.4	9722.87	1.03133	1	0.0711204
8	A8	5.12EV71 48D-160	GAPDH	12.782	12.726	0.058					5.12EV71 V3	VP1	10.984		-1.452		-13.3177	10209.8		1.05008
9	A9	5.12EV71 48D-160	GAPDH	12.666	12.726	0.058					5.12EV71 V3	VP1	11.177		-1.259		-13.1247	8931.38		0.918594
10	A10	5.12EV71 48D-160	VP1	11.603	12.118	0.838					5.12EV71 V3	GAPDH	12.39	12.436						0
11	A11	5.12EV71 48D-160	VP1	11.667	12.118	0.838					5.12EV71 V3	GAPDH	12.486							0
12	A12	5.12EV71 48D-160	VP1	13.085	12.118	0.838					5.12EV71 V3	GAPDH	12.432							0
13	B1	5.12EV71 48-32	GAPDH	12.162	12.14	0.02					5.12EV71 48-6	VP1	11.184	11.2083	-1.16		-13.0257	8339.05		0.857673	0.84456	0.0554107
14	B2	5.12EV71 48-32	GAPDH	12.124	12.14	0.02					5.12EV71 48-6	VP1	11.127		-1.217		-13.0827	8675.11		0.892237
15	B3	5.12EV71 48-32	GAPDH	12.133	12.14	0.02					5.12EV71 48-6	VP1	11.314		-1.03		-12.8957	7620.48		0.783769
16	B4	5.12EV71 48-32	VP1	11.233	11.242	0.041					5.12EV71 48-6	GAPDH	12.371	12.344
17	B5	5.12EV71 48-32	VP1	11.205	11.242	0.041					5.12EV71 48-6	GAPDH	12.315
18	B6	5.12EV71 48-32	VP1	11.287	11.242	0.041					5.12EV71 48-6	GAPDH	12.346
19	B7	5.12EV71 48D-800	GAPDH	12.931	12.865	0.068					5.12EV71 48D-32	VP1	12.04	12.0533	-0.471667		-12.3373	5174.96		0.532246	0.527442	0.0120229
20	B8	5.12EV71 48D-800	GAPDH	12.868	12.865	0.068					5.12EV71 48D-32	VP1	12.029		-0.482667		-12.3483	5214.57		0.53632
21	B9	5.12EV71 48D-800	GAPDH	12.796	12.865	0.068					5.12EV71 48D-32	VP1	12.091		-0.420667		-12.2863	4995.22		0.51376
22	B10	5.12EV71 48D-800	VP1	12.868	12.954	0.076					5.12EV71 48D-32	GAPDH	12.542	12.5117
23	B11	5.12EV71 48D-800	VP1	12.983	12.954	0.076					5.12EV71 48D-32	GAPDH	12.483
24	B12	5.12EV71 48D-800	VP1	13.01	12.954	0.076					5.12EV71 48D-32	GAPDH	12.51
25	C1	5.12EV71 48-160	GAPDH	12.489	12.459	0.052					5.12EV71 48-160	VP1	12.238	12.3357	-0.221667		-12.0873	4351.61		0.447564	0.418911	0.0284302
26	C2	5.12EV71 48-160	GAPDH	12.49	12.459	0.052					5.12EV71 48-160	VP1	12.434		-0.0256667		-11.8913	3798.81		0.390709
27	C3	5.12EV71 48-160	GAPDH	12.4	12.459	0.052					5.12EV71 48-160	VP1	12.335		-0.124667		-11.9903	4068.65		0.418461
28	C4	5.12EV71 48-160	VP1	12.238	12.336	0.098					5.12EV71 48-160	GAPDH	12.489	12.4597
29	C5	5.12EV71 48-160	VP1	12.434	12.336	0.098					5.12EV71 48-160	GAPDH	12.49
30	C6	5.12EV71 48-160	VP1	12.335	12.336	0.098					5.12EV71 48-160	GAPDH	12.4
31	C7	5.12EV71 48D-4	GAPDH	14.047	14.088	0.038					5.12EV71 48-800	VP1	14.78	14.879	1.99067		-9.875	939.012		0.0965776	0.0903278	0.00646415
32	C8	5.12EV71 48D-4	GAPDH	14.097	14.088	0.038					5.12EV71 48-800	VP1	14.87		2.08067		-9.785	882.223		0.0907369
33	C9	5.12EV71 48D-4	GAPDH	14.121	14.088	0.038					5.12EV71 48-800	VP1	14.987		2.19767		-9.668	813.501		0.0836688
34	C10	5.12EV71 48D-4	VP1	16.7	16.707	0.047					5.12EV71 48-800	GAPDH	12.709	12.7893
35	C11	5.12EV71 48D-4	VP1	16.663	16.707	0.047					5.12EV71 48-800	GAPDH	13.218
36	C12	5.12EV71 48D-4	VP1	16.757	16.707	0.047					5.12EV71 48-800	GAPDH	12.441
37	D1	5.12EV71 48-800	GAPDH	12.709	12.789	0.394					5.12EV71 48D-4	VP1	16.7	16.7067	2.61167		-9.254	610.565		0.0627967	0.0625296	0.00204514
38	D2	5.12EV71 48-800	GAPDH	13.218	12.789	0.394					5.12EV71 48D-4	VP1	16.663		2.57467		-9.291	626.426		0.0644281
39	D3	5.12EV71 48-800	GAPDH	12.441	12.789	0.394					5.12EV71 48D-4	VP1	16.757		2.66867		-9.197	586.912		0.060364
40	D4	5.12EV71 48-800	VP1	14.78	14.879	0.104					5.12EV71 48D-4	GAPDH	14.047	14.0883
41	D5	5.12EV71 48-800	VP1	14.87	14.879	0.104					5.12EV71 48D-4	GAPDH	14.097
42	D6	5.12EV71 48-800	VP1	14.987	14.879	0.104					5.12EV71 48D-4	GAPDH	14.121
43	D7	5.12EV71 48D-20	GAPDH	14.363	14.334	0.056					5.12EV71 48D-20	VP1	20.379	20.4483	6.04467		-5.821	56.5322		0.00581435	0.00554798	0.000324914
44	D8	5.12EV71 48D-20	GAPDH	14.27	14.334	0.056					5.12EV71 48D-20	VP1	20.422		6.08767		-5.778	54.8721		0.00564361
45	D9	5.12EV71 48D-20	GAPDH	14.37	14.334	0.056					5.12EV71 48D-20	VP1	20.544		6.20967		-5.656	50.4226		0.00518598
46	D10	5.12EV71 48D-20	VP1	20.379	20.448	0.086					5.12EV71 48D-20	GAPDH	14.363	14.3343
47	D11	5.12EV71 48D-20	VP1	20.422	20.448	0.086					5.12EV71 48D-20	GAPDH	14.27
48	D12	5.12EV71 48D-20	VP1	20.544	20.448	0.086					5.12EV71 48D-20	GAPDH	14.37
49	E1	5.12EV71 48-4	GAPDH	13.829	13.792	0.04						VP1		#DIV/0!	#DIV/0!		#DIV/0!	#DIV/0!		#DIV/0!	#DIV/0!	#DIV/0!
50	E2	5.12EV71 48-4	GAPDH	13.797	13.792	0.04						VP1			#DIV/0!		#DIV/0!	#DIV/0!		#DIV/0!
51	E3	5.12EV71 48-4	GAPDH	13.75	13.792	0.04						VP1			#DIV/0!		#DIV/0!	#DIV/0!		#DIV/0!
52	E4	5.12EV71 48-4	VP1	15.467	15.395	0.063						GAPDH		#DIV/0!
53	E5	5.12EV71 48-4	VP1	15.352	15.395	0.063						GAPDH
54	E6	5.12EV71 48-4	VP1	15.366	15.395	0.063						GAPDH
55	E7	5.12EV71 V1	GAPDH	12.866	12.811	0.056						VP1		#DIV/0!	#DIV/0!		#DIV/0!	#DIV/0!		#DIV/0!	#DIV/0!	#DIV/0!
56	E8	5.12EV71 V1	GAPDH	12.754	12.811	0.056						VP1			#DIV/0!		#DIV/0!	#DIV/0!		#DIV/0!
57	E9	5.12EV71 V1	GAPDH	12.812	12.811	0.056						VP1			#DIV/0!		#DIV/0!	#DIV/0!		#DIV/0!
58	E10	5.12EV71 V1	VP1	11.112	11.163	0.049						GAPDH		#DIV/0!
59	E11	5.12EV71 V1	VP1	11.169	11.163	0.049						GAPDH
60	E12	5.12EV71 V1	VP1	11.209	11.163	0.049						GAPDH
61	F1	5.12EV71 48-20	GAPDH	14.79	14.796	0.011						VP1		#DIV/0!	#DIV/0!		#DIV/0!	#DIV/0!		#DIV/0!	#DIV/0!	#DIV/0!
62	F2	5.12EV71 48-20	GAPDH	14.809	14.796	0.011						VP1			#DIV/0!		#DIV/0!	#DIV/0!		#DIV/0!
63	F3	5.12EV71 48-20	GAPDH	14.789	14.796	0.011						VP1			#DIV/0!		#DIV/0!	#DIV/0!		#DIV/0!
64	F4	5.12EV71 48-20	VP1	21.767	21.811	0.078						GAPDH		#DIV/0!
65	F5	5.12EV71 48-20	VP1	21.766	21.811	0.078						GAPDH
66	F6	5.12EV71 48-20	VP1	21.901	21.811	0.078						GAPDH
67	F7	5.12EV71 V2	GAPDH	12.982	12.984	0.005						VP1		#DIV/0!	#DIV/0!		#DIV/0!	#DIV/0!		#DIV/0!	#DIV/0!	#DIV/0!
68	F8	5.12EV71 V2	GAPDH	12.99	12.984	0.005						VP1			#DIV/0!		#DIV/0!	#DIV/0!		#DIV/0!
69	F9	5.12EV71 V2	GAPDH	12.98	12.984	0.005						VP1			#DIV/0!		#DIV/0!	#DIV/0!		#DIV/0!
70	F10	5.12EV71 V2	VP1	11.159	11.232	0.071						GAPDH		#DIV/0!
71	F11	5.12EV71 V2	VP1	11.237	11.232	0.071						GAPDH
72	F12	5.12EV71 V2	VP1	11.301	11.232	0.071						GAPDH
73	G1	5.12EV71 48D-6	GAPDH	12.855	12.849	0.034						VP1		#DIV/0!	#DIV/0!		#DIV/0!	#DIV/0!		#DIV/0!	#DIV/0!	#DIV/0!
74	G2	5.12EV71 48D-6	GAPDH	12.879	12.849	0.034						VP1			#DIV/0!		#DIV/0!	#DIV/0!		#DIV/0!
75	G3	5.12EV71 48D-6	GAPDH	12.812	12.849	0.034						VP1			#DIV/0!		#DIV/0!	#DIV/0!		#DIV/0!
76	G4	5.12EV71 48D-6	VP1	11.971	12.01	0.041						GAPDH		#DIV/0!
77	G5	5.12EV71 48D-6	VP1	12.053	12.01	0.041						GAPDH
78	G6	5.12EV71 48D-6	VP1	12.005	12.01	0.041						GAPDH
79	G7	5.12EV71 V3	GAPDH	12.39	12.436	0.048						VP1		#DIV/0!	#DIV/0!		#DIV/0!	#DIV/0!		#DIV/0!	#DIV/0!	#DIV/0!
80	G8	5.12EV71 V3	GAPDH	12.486	12.436	0.048						VP1			#DIV/0!		#DIV/0!	#DIV/0!		#DIV/0!
81	G9	5.12EV71 V3	GAPDH	12.432	12.436	0.048						VP1			#DIV/0!		#DIV/0!	#DIV/0!		#DIV/0!
82	G10	5.12EV71 V3	VP1	11.01	11.057	0.105						GAPDH		#DIV/0!
83	G11	5.12EV71 V3	VP1	10.984	11.057	0.105						GAPDH
84	G12	5.12EV71 V3	VP1	11.177	11.057	0.105						GAPDH
85	H1	5.12EV71 48D-32	GAPDH	12.542	12.512	0.029						VP1		#DIV/0!	#DIV/0!		#DIV/0!	#DIV/0!		#DIV/0!	#DIV/0!	#DIV/0!
86	H2	5.12EV71 48D-32	GAPDH	12.483	12.512	0.029						VP1			#DIV/0!		#DIV/0!	#DIV/0!		#DIV/0!
87	H3	5.12EV71 48D-32	GAPDH	12.51	12.512	0.029						VP1			#DIV/0!		#DIV/0!	#DIV/0!		#DIV/0!
88	H4	5.12EV71 48D-32	VP1	12.04	12.053	0.033						GAPDH		#DIV/0!
89	H5	5.12EV71 48D-32	VP1	12.029	12.053	0.033						GAPDH
90	H6	5.12EV71 48D-32	VP1	12.091	12.053	0.033						GAPDH
91	H7	5.12EV71 C1	GAPDH	12.146	12.069	0.067						VP1		#DIV/0!	#DIV/0!		#DIV/0!	#DIV/0!		#DIV/0!	#DIV/0!	#DIV/0!
92	H8	5.12EV71 C1	GAPDH	12.021	12.069	0.067						VP1			#DIV/0!		#DIV/0!	#DIV/0!		#DIV/0!
93	H9	5.12EV71 C1	GAPDH	12.039	12.069	0.067						VP1			#DIV/0!		#DIV/0!	#DIV/0!		#DIV/0!
94	H10	5.12EV71 C1	VP1	23.829	23.934	0.224						GAPDH		#DIV/0!
95	H11	5.12EV71 C1	VP1	23.782	23.934	0.224						GAPDH
96	H12	5.12EV71 C1	VP1	24.192	23.934	0.224						GAPDH
Analysis Type = Singleplex
Endogenous Control = ACTIN
RQ Min/Max Confidence Level = 95.0
Reference Sample = EV71016160NM

## Sheet: 常用 2-ΔCт模版  1 V作对照
Well	Well Position	Sample Name	Target Name	CT	Ct Mean	Ct SD			Sample Name	Target Name	CT	mean	ΔCT		ΔΔCT	2-ΔΔCT	mean	SD
1	A1	5.12EV71 48-6	GAPDH	12.371	12.344	0.028			0-1	HBV	22.917	22.941	7.18767		11.835	0.000273722	0.000269308	8.99633e-06
2	A2	5.12EV71 48-6	GAPDH	12.315	12.344	0.028			0-1	HBV	22.909		7.17967		11.827	0.000275244
3	A3	5.12EV71 48-6	GAPDH	12.346	12.344	0.028			0-1	HBV	22.997		7.26767		11.915	0.000258957
4	A4	5.12EV71 48-6	VP1	11.184	11.208	0.096			0-1	GAPDH	15.71	15.7293
5	A5	5.12EV71 48-6	VP1	11.127	11.208	0.096			0-1	GAPDH	15.735
6	A6	5.12EV71 48-6	VP1	11.314	11.208	0.096			0-1	GAPDH	15.743
7	A7	5.12EV71 48D-160	GAPDH	12.73	12.726	0.058			0.5-1	HBV	10.287	10.3307	-4.691	-4.64733	-0.0436667	1.03073	1.00029	0.029533
8	A8	5.12EV71 48D-160	GAPDH	12.782	12.726	0.058			0.5-1	HBV	10.372		-4.606		0.0413333	0.971756
9	A9	5.12EV71 48D-160	GAPDH	12.666	12.726	0.058			0.5-1	HBV	10.333		-4.645		0.00233333	0.998384
10	A10	5.12EV71 48D-160	VP1	11.603	12.118	0.838			0.5-1	GAPDH	15.063	14.978
11	A11	5.12EV71 48D-160	VP1	11.667	12.118	0.838			0.5-1	GAPDH	14.913
12	A12	5.12EV71 48D-160	VP1	13.085	12.118	0.838			0.5-1	GAPDH	14.958
13	B1	5.12EV71 48-32	GAPDH	12.162	12.14	0.02			1-1	HBV	10	9.91567	-5.18533		-0.538	1.45196	1.54355	0.141445
14	B2	5.12EV71 48-32	GAPDH	12.124	12.14	0.02			1-1	HBV	9.767		-5.41833		-0.771	1.70645
15	B3	5.12EV71 48-32	GAPDH	12.133	12.14	0.02			1-1	HBV	9.98		-5.20533		-0.558	1.47223
16	B4	5.12EV71 48-32	VP1	11.233	11.242	0.041			1-1	GAPDH	15.319	15.1853
17	B5	5.12EV71 48-32	VP1	11.205	11.242	0.041			1-1	GAPDH	15.066
18	B6	5.12EV71 48-32	VP1	11.287	11.242	0.041			1-1	GAPDH	15.171
19	B7	5.12EV71 48D-800	GAPDH	12.931	12.865	0.068			2-1	HBV	9.411	9.37767	-5.94933		-1.302	2.4657	2.52439	0.0900412
20	B8	5.12EV71 48D-800	GAPDH	12.868	12.865	0.068			2-1	HBV	9.319		-6.04133		-1.394	2.62806
21	B9	5.12EV71 48D-800	GAPDH	12.796	12.865	0.068			2-1	HBV	9.403		-5.95733		-1.31	2.47942
22	B10	5.12EV71 48D-800	VP1	12.868	12.954	0.076			2-1	GAPDH	15.397	15.3603
23	B11	5.12EV71 48D-800	VP1	12.983	12.954	0.076			2-1	GAPDH	15.325
24	B12	5.12EV71 48D-800	VP1	13.01	12.954	0.076			2-1	GAPDH	15.359
25	C1	5.12EV71 48-160	GAPDH	12.489	12.459	0.052			0-2	HBV	22.204	21.609	6.97567		11.623	0.00031705	0.000583865	0.000470594
26	C2	5.12EV71 48-160	GAPDH	12.49	12.459	0.052			0-2	HBV	22.249		7.02067		11.668	0.000307314
27	C3	5.12EV71 48-160	GAPDH	12.4	12.459	0.052			0-2	HBV	20.374		5.14567		9.793	0.00112723
28	C4	5.12EV71 48-160	VP1	12.238	12.336	0.098			0-2	GAPDH	15.285	15.2283
29	C5	5.12EV71 48-160	VP1	12.434	12.336	0.098			0-2	GAPDH	15.275
30	C6	5.12EV71 48-160	VP1	12.335	12.336	0.098			0-2	GAPDH	15.125
31	C7	5.12EV71 48D-4	GAPDH	14.047	14.088	0.038			0.5-2	HBV	10.179	10.3287	-5.621		-0.973667	1.96383	1.77576	0.172015
32	C8	5.12EV71 48D-4	GAPDH	14.097	14.088	0.038			0.5-2	HBV	10.356		-5.444		-0.796667	1.73708
33	C9	5.12EV71 48D-4	GAPDH	14.121	14.088	0.038			0.5-2	HBV	10.451		-5.349		-0.701667	1.62638
34	C10	5.12EV71 48D-4	VP1	16.7	16.707	0.047			0.5-2	GAPDH	15.873	15.8
35	C11	5.12EV71 48D-4	VP1	16.663	16.707	0.047			0.5-2	GAPDH	15.703
36	C12	5.12EV71 48D-4	VP1	16.757	16.707	0.047			0.5-2	GAPDH	15.824
37	D1	5.12EV71 48-800	GAPDH	12.709	12.789	0.394			1-2	HBV	9.697	9.67167	-5.69633		-1.049	2.0691	2.1069	0.0860079
38	D2	5.12EV71 48-800	GAPDH	13.218	12.789	0.394			1-2	HBV	9.605		-5.78833		-1.141	2.20534
39	D3	5.12EV71 48-800	GAPDH	12.441	12.789	0.394			1-2	HBV	9.713		-5.68033		-1.033	2.04627
40	D4	5.12EV71 48-800	VP1	14.78	14.879	0.104			1-2	GAPDH	15.307	15.3933
41	D5	5.12EV71 48-800	VP1	14.87	14.879	0.104			1-2	GAPDH	15.417
42	D6	5.12EV71 48-800	VP1	14.987	14.879	0.104			1-2	GAPDH	15.456
43	D7	5.12EV71 48D-20	GAPDH	14.363	14.334	0.056			2-2	HBV	10.308	10.3883	-5.457		-0.809667	1.75281	1.66173	0.136407
44	D8	5.12EV71 48D-20	GAPDH	14.27	14.334	0.056			2-2	HBV	10.329		-5.436		-0.788667	1.72748
45	D9	5.12EV71 48D-20	GAPDH	14.37	14.334	0.056			2-2	HBV	10.528		-5.237		-0.589667	1.5049
46	D10	5.12EV71 48D-20	VP1	20.379	20.448	0.086			2-2	GAPDH	16.116	15.765
47	D11	5.12EV71 48D-20	VP1	20.422	20.448	0.086			2-2	GAPDH	15.657
48	D12	5.12EV71 48D-20	VP1	20.544	20.448	0.086			2-2	GAPDH	15.522
49	E1	5.12EV71 48-4	GAPDH	13.829	13.792	0.04			0-3	HBV	23.841	23.7677	8.83233		13.4797	8.75419e-05	9.22317e-05	5.93207e-06
50	E2	5.12EV71 48-4	GAPDH	13.797	13.792	0.04			0-3	HBV	23.797		8.78833		13.4357	9.02529e-05
51	E3	5.12EV71 48-4	GAPDH	13.75	13.792	0.04			0-3	HBV	23.665		8.65633		13.3037	9.89002e-05
52	E4	5.12EV71 48-4	VP1	15.467	15.395	0.063			0-3	GAPDH	14.973	15.0087
53	E5	5.12EV71 48-4	VP1	15.352	15.395	0.063			0-3	GAPDH	14.972
54	E6	5.12EV71 48-4	VP1	15.366	15.395	0.063			0-3	GAPDH	15.081
55	E7	5.12EV71 V1	GAPDH	12.866	12.811	0.056			0.5-3	HBV	10.809	10.871	-3.22		1.42733	0.371818	0.357161	0.0319057
56	E8	5.12EV71 V1	GAPDH	12.754	12.811	0.056			0.5-3	HBV	10.781		-3.248		1.39933	0.379104
57	E9	5.12EV71 V1	GAPDH	12.812	12.811	0.056			0.5-3	HBV	11.023		-3.006		1.64133	0.32056
58	E10	5.12EV71 V1	VP1	11.112	11.163	0.049			0.5-3	GAPDH	14.086	14.029
59	E11	5.12EV71 V1	VP1	11.169	11.163	0.049			0.5-3	GAPDH	14.006
60	E12	5.12EV71 V1	VP1	11.209	11.163	0.049			0.5-3	GAPDH	13.995
61	F1	5.12EV71 48-20	GAPDH	14.79	14.796	0.011			1-3	HBV	9.526	9.658	-5.40033		-0.753	1.68529	1.55221	0.249059
62	F2	5.12EV71 48-20	GAPDH	14.809	14.796	0.011			1-3	HBV	9.508		-5.41833		-0.771	1.70645
63	F3	5.12EV71 48-20	GAPDH	14.789	14.796	0.011			1-3	HBV	9.94		-4.98633		-0.339	1.26488
64	F4	5.12EV71 48-20	VP1	21.767	21.811	0.078			1-3	GAPDH	14.817	14.9263
65	F5	5.12EV71 48-20	VP1	21.766	21.811	0.078			1-3	GAPDH	15.022
66	F6	5.12EV71 48-20	VP1	21.901	21.811	0.078			1-3	GAPDH	14.94
67	F7	5.12EV71 V2	GAPDH	12.982	12.984	0.005			2-3	HBV	9.272	9.172	-6.347		-1.69967	3.24826	3.48675	0.236369
68	F8	5.12EV71 V2	GAPDH	12.99	12.984	0.005			2-3	HBV	9.168		-6.451		-1.80367	3.49106
69	F9	5.12EV71 V2	GAPDH	12.98	12.984	0.005			2-3	HBV	9.076		-6.543		-1.89567	3.72094
70	F10	5.12EV71 V2	VP1	11.159	11.232	0.071			2-3	GAPDH	15.566	15.619
71	F11	5.12EV71 V2	VP1	11.237	11.232	0.071			2-3	GAPDH	15.533
72	F12	5.12EV71 V2	VP1	11.301	11.232	0.071			2-3	GAPDH	15.758
73	G1	5.12EV71 48D-6	GAPDH	12.855	12.849	0.034						#DIV/0!	#DIV/0!		#DIV/0!	#DIV/0!	#DIV/0!	#DIV/0!
74	G2	5.12EV71 48D-6	GAPDH	12.879	12.849	0.034							#DIV/0!		#DIV/0!	#DIV/0!
75	G3	5.12EV71 48D-6	GAPDH	12.812	12.849	0.034							#DIV/0!		#DIV/0!	#DIV/0!
76	G4	5.12EV71 48D-6	VP1	11.971	12.01	0.041						#DIV/0!
77	G5	5.12EV71 48D-6	VP1	12.053	12.01	0.041
78	G6	5.12EV71 48D-6	VP1	12.005	12.01	0.041
79	G7	5.12EV71 V3	GAPDH	12.39	12.436	0.048						#DIV/0!	#DIV/0!		#DIV/0!	#DIV/0!	#DIV/0!	#DIV/0!
80	G8	5.12EV71 V3	GAPDH	12.486	12.436	0.048							#DIV/0!		#DIV/0!	#DIV/0!
81	G9	5.12EV71 V3	GAPDH	12.432	12.436	0.048							#DIV/0!		#DIV/0!	#DIV/0!
82	G10	5.12EV71 V3	VP1	11.01	11.057	0.105						#DIV/0!
83	G11	5.12EV71 V3	VP1	10.984	11.057	0.105
84	G12	5.12EV71 V3	VP1	11.177	11.057	0.105
85	H1	5.12EV71 48D-32	GAPDH	12.542	12.512	0.029				VP1		#DIV/0!	#DIV/0!		#DIV/0!	#DIV/0!	#DIV/0!	#DIV/0!
86	H2	5.12EV71 48D-32	GAPDH	12.483	12.512	0.029				VP1			#DIV/0!		#DIV/0!	#DIV/0!
87	H3	5.12EV71 48D-32	GAPDH	12.51	12.512	0.029				VP1			#DIV/0!		#DIV/0!	#DIV/0!
88	H4	5.12EV71 48D-32	VP1	12.04	12.053	0.033				GAPDH		#DIV/0!
89	H5	5.12EV71 48D-32	VP1	12.029	12.053	0.033				GAPDH
90	H6	5.12EV71 48D-32	VP1	12.091	12.053	0.033				GAPDH
91	H7	5.12EV71 C1	GAPDH	12.146	12.069	0.067				VP1		#DIV/0!	#DIV/0!		#DIV/0!	#DIV/0!	#DIV/0!	#DIV/0!
92	H8	5.12EV71 C1	GAPDH	12.021	12.069	0.067				VP1			#DIV/0!		#DIV/0!	#DIV/0!
93	H9	5.12EV71 C1	GAPDH	12.039	12.069	0.067				VP1			#DIV/0!		#DIV/0!	#DIV/0!
94	H10	5.12EV71 C1	VP1	23.829	23.934	0.224				GAPDH		#DIV/0!
95	H11	5.12EV71 C1	VP1	23.782	23.934	0.224				GAPDH
96	H12	5.12EV71 C1	VP1	24.192	23.934	0.224				GAPDH
Analysis Type = Singleplex
Endogenous Control = ACTIN
RQ Min/Max Confidence Level = 95.0
Reference Sample = EV71016160NM

## Sheet: Sheet1
Sample Name	Target Name	CT
0-1	GAPDH	15.71			0-1	GAPDH	15.71		0-2	GAPDH	15.285		0-3	GAPDH	14.973
0-1	GAPDH	15.735			0-1	GAPDH	15.735		0-2	GAPDH	15.275		0-3	GAPDH	14.972
0-1	GAPDH	15.743			0-1	GAPDH	15.743		0-2	GAPDH	15.125		0-3	GAPDH	15.081
0-1	HBV	22.917			0-1	HBV	22.917		0-2	HBV	22.204		0-3	HBV	23.841
0-1	HBV	22.909			0-1	HBV	22.909		0-2	HBV	22.249		0-3	HBV	23.797
0-1	HBV	22.997			0-1	HBV	22.997		0-2	HBV	20.374		0-3	HBV	23.665
0-3	GAPDH	14.973			0.5-1	GAPDH	15.063		0.5-2	GAPDH	15.873		0.5-3	GAPDH	14.086
0-3	GAPDH	14.972			0.5-1	GAPDH	14.913		0.5-2	GAPDH	15.703		0.5-3	GAPDH	14.006
0-3	GAPDH	15.081			0.5-1	GAPDH	14.958		0.5-2	GAPDH	15.824		0.5-3	GAPDH	13.995
0-3	HBV	23.841			0.5-1	HBV	10.287		0.5-2	HBV	10.179		0.5-3	HBV	10.809
0-3	HBV	23.797			0.5-1	HBV	10.372		0.5-2	HBV	10.356		0.5-3	HBV	10.781
0-3	HBV	23.665			0.5-1	HBV	10.333		0.5-2	HBV	10.451		0.5-3	HBV	11.023
0.5-1	GAPDH	15.063			1-1	GAPDH	15.319		1-2	GAPDH	15.307		1-3	GAPDH	14.817
0.5-1	GAPDH	14.913			1-1	GAPDH	15.066		1-2	GAPDH	15.417		1-3	GAPDH	15.022
0.5-1	GAPDH	14.958			1-1	GAPDH	15.171		1-2	GAPDH	15.456		1-3	GAPDH	14.94
0.5-1	HBV	10.287			1-1	HBV	10		1-2	HBV	9.697		1-3	HBV	9.526
0.5-1	HBV	10.372			1-1	HBV	9.767		1-2	HBV	9.605		1-3	HBV	9.508
0.5-1	HBV	10.333			1-1	HBV	9.98		1-2	HBV	9.713		1-3	HBV	9.94
0.5-3	GAPDH	14.086			2-1	GAPDH	15.397		2-2	GAPDH	16.116		2-3	GAPDH	15.566
0.5-3	GAPDH	14.006			2-1	GAPDH	15.325		2-2	GAPDH	15.657		2-3	GAPDH	15.533
0.5-3	GAPDH	13.995			2-1	GAPDH	15.359		2-2	GAPDH	15.522		2-3	GAPDH	15.758
0.5-3	HBV	10.809			2-1	HBV	9.411		2-2	HBV	10.308		2-3	HBV	9.272
0.5-3	HBV	10.781			2-1	HBV	9.319		2-2	HBV	10.329		2-3	HBV	9.168
0.5-3	HBV	11.023			2-1	HBV	9.403		2-2	HBV	10.528		2-3	HBV	9.076
1-1	GAPDH	15.319
1-1	GAPDH	15.066
1-1	GAPDH	15.171
1-1	HBV	10
1-1	HBV	9.767
1-1	HBV	9.98
1-3	GAPDH	14.817
1-3	GAPDH	15.022
1-3	GAPDH	14.94
1-3	HBV	9.526
1-3	HBV	9.508
1-3	HBV	9.94
2-1	GAPDH	15.397
2-1	GAPDH	15.325
2-1	GAPDH	15.359
2-1	HBV	9.411
2-1	HBV	9.319
2-1	HBV	9.403
2-3	GAPDH	15.566
2-3	GAPDH	15.533
2-3	GAPDH	15.758
2-3	HBV	9.272
2-3	HBV	9.168
2-3	HBV	9.076
0-2	GAPDH	15.285
0-2	GAPDH	15.275
0-2	GAPDH	15.125
0-2	HBV	22.204
0-2	HBV	22.249
0-2	HBV	20.374
0.5-2	GAPDH	15.873
0.5-2	GAPDH	15.703
0.5-2	GAPDH	15.824
0.5-2	HBV	10.179
0.5-2	HBV	10.356
0.5-2	HBV	10.451
1-2	GAPDH	15.307
1-2	GAPDH	15.417
1-2	GAPDH	15.456
1-2	HBV	9.697
1-2	HBV	9.605
1-2	HBV	9.713
2-2	GAPDH	16.116
2-2	GAPDH	15.657
2-2	GAPDH	15.522
2-2	HBV	10.308
2-2	HBV	10.329
2-2	HBV	10.528

## Sheet: 2-ΔCт模版  2 C做对照
Well	Well Position	Sample Name	Target Name	CT	Ct Mean	Ct SD					Sample Name	Target Name	CT	Ct Mean	ΔCт	mean	ΔΔCT	2-ΔΔCт	mean	相对量计算	mean	SD
1	A1	5.23EV71 C1	GAPDH	10.41	9.111	1.167					5.23EV71 C1	GAPDH	10.41	9.111
2	A2	5.23EV71 C1	GAPDH	8.773	9.111	1.167					5.23EV71 C1	GAPDH	8.773
3	A3	5.23EV71 C1	GAPDH	8.15	9.111	1.167					5.23EV71 C1	GAPDH	8.15
4	A4	5.23EV71 C1	VP1	22.708	22.725	0.015					5.23EV71 C1	VP1	22.708	22.725	13.597	13.614	-0.017	1.01185		1.26234e-05	1.2476e-05	1.28334e-07
5	A5	5.23EV71 C1	VP1	22.735	22.725	0.015					5.23EV71 C1	VP1	22.735		13.624		0.01	0.993092		1.23894e-05
6	A6	5.23EV71 C1	VP1	22.732	22.725	0.015					5.23EV71 C1	VP1	22.732		13.621		0.007	0.99516		1.24152e-05
7	A7	5.23EV71 V1	GAPDH	11.565	11.412	0.17					5.23EV71 V1	GAPDH	11.565	11.4113
8	A8	5.23EV71 V1	GAPDH	11.44	11.412	0.17					5.23EV71 V1	GAPDH	11.44
9	A9	5.23EV71 V1	GAPDH	11.229	11.412	0.17					5.23EV71 V1	GAPDH	11.229
10	A10	5.23EV71 V1	VP1	8.766	8.735	0.03					5.23EV71 V1	VP1	8.766	8.735	-2.64533		-16.2593	78441.7	80156.7	0.978604	1	0.0204942
11	A11	5.23EV71 V1	VP1	8.732	8.735	0.03					5.23EV71 V1	VP1	8.732		-2.67933		-16.2933	80312.3		1.00194
12	A12	5.23EV71 V1	VP1	8.707	8.735	0.03					5.23EV71 V1	VP1	8.707		-2.70433		-16.3183	81716.1		1.01945
13	B1	5.23EV71 46-20	GAPDH	11.557	11.457	0.097					5.23EV71 46-6	GAPDH	11.857	11.862
14	B2	5.23EV71 46-20	GAPDH	11.363	11.457	0.097					5.23EV71 46-6	GAPDH	11.844
15	B3	5.23EV71 46-20	GAPDH	11.451	11.457	0.097					5.23EV71 46-6	GAPDH	11.885
16	B4	5.23EV71 46-20	VP1	13.52	13.543	0.086					5.23EV71 46-6	VP1	9.224	9.23267	-2.638		-16.252	78044		0.973643	0.96782	0.00504258
17	B5	5.23EV71 46-20	VP1	13.637	13.543	0.086					5.23EV71 46-6	VP1	9.237		-2.625		-16.239	77343.9		0.964909
18	B6	5.23EV71 46-20	VP1	13.471	13.543	0.086					5.23EV71 46-6	VP1	9.237		-2.625		-16.239	77343.9		0.964909
19	B7	5.23EV71 46-4	GAPDH	11.254	11.117	0.12					5.23EV71 46-32	GAPDH	11.343	11.3093
20	B8	5.23EV71 46-4	GAPDH	11.063	11.117	0.12					5.23EV71 46-32	GAPDH	11.352
21	B9	5.23EV71 46-4	GAPDH	11.033	11.117	0.12					5.23EV71 46-32	GAPDH	11.233
22	B10	5.23EV71 46-4	VP1	13.202	13.142	0.064					5.23EV71 46-32	VP1	9.246	9.232	-2.06333		-15.6773	52402		0.653744	0.660147	0.0075054
23	B11	5.23EV71 46-4	VP1	13.075	13.142	0.064					5.23EV71 46-32	VP1	9.236		-2.07333		-15.6873	52766.5		0.658291
24	B12	5.23EV71 46-4	VP1	13.15	13.142	0.064					5.23EV71 46-32	VP1	9.214		-2.09533		-15.7093	53577.3		0.668406
25	C1	5.23EV71 46-800	GAPDH	10.924	10.914	0.086					5.23EV71 46-160	GAPDH	11.108	11.0677
26	C2	5.23EV71 46-800	GAPDH	10.994	10.914	0.086					5.23EV71 46-160	GAPDH	11.107
27	C3	5.23EV71 46-800	GAPDH	10.823	10.914	0.086					5.23EV71 46-160	GAPDH	10.988
28	C4	5.23EV71 46-800	VP1	13.281	13.226	0.095					5.23EV71 46-160	VP1	11.622	11.628	0.554333		-13.0597	8537.91		0.106515	0.106088	0.00215986
29	C5	5.23EV71 46-800	VP1	13.279	13.226	0.095					5.23EV71 46-160	VP1	11.66		0.592333		-13.0217	8315.96		0.103746
30	C6	5.23EV71 46-800	VP1	13.116	13.226	0.095					5.23EV71 46-160	VP1	11.602		0.534333		-13.0797	8657.09		0.108002
31	C7	5.23EV71 46-160	GAPDH	11.108	11.067	0.069					5.23EV71 46-800	GAPDH	10.924	10.9137
32	C8	5.23EV71 46-160	GAPDH	11.107	11.067	0.069					5.23EV71 46-800	GAPDH	10.994
33	C9	5.23EV71 46-160	GAPDH	10.988	11.067	0.069					5.23EV71 46-800	GAPDH	10.823
34	C10	5.23EV71 46-160	VP1	11.622	11.628	0.03					5.23EV71 46-800	VP1	13.281	13.2253	2.36733		-11.2467	2429.88		0.0303141	0.0315524	0.00210859
35	C11	5.23EV71 46-160	VP1	11.66	11.628	0.03					5.23EV71 46-800	VP1	13.279		2.36533		-11.2487	2433.25		0.0303561
36	C12	5.23EV71 46-160	VP1	11.602	11.628	0.03					5.23EV71 46-800	VP1	13.116		2.20233		-11.4117	2724.29		0.0339871
37	D1	5.23EV71 46-32	GAPDH	11.343	11.309	0.066					5.23EV71 46-4	GAPDH	11.254	11.1167
38	D2	5.23EV71 46-32	GAPDH	11.352	11.309	0.066					5.23EV71 46-4	GAPDH	11.063
39	D3	5.23EV71 46-32	GAPDH	11.233	11.309	0.066					5.23EV71 46-4	GAPDH	11.033
40	D4	5.23EV71 46-32	VP1	9.246	9.232	0.016					5.23EV71 46-4	VP1	13.202	13.1423	2.08533		-11.5287	2954.44		0.0368582	0.0384397	0.00170739
41	D5	5.23EV71 46-32	VP1	9.236	9.232	0.016					5.23EV71 46-4	VP1	13.075		1.95833		-11.6557	3226.3		0.04025
42	D6	5.23EV71 46-32	VP1	9.214	9.232	0.016					5.23EV71 46-4	VP1	13.15		2.03333		-11.5807	3062.87		0.038211
43	D7	5.23EV71 46-6	GAPDH	11.857	11.862	0.021					5.23EV71 46-20	GAPDH	11.557	11.457
44	D8	5.23EV71 46-6	GAPDH	11.844	11.862	0.021					5.23EV71 46-20	GAPDH	11.363
45	D9	5.23EV71 46-6	GAPDH	11.885	11.862	0.021					5.23EV71 46-20	GAPDH	11.451
46	D10	5.23EV71 46-6	VP1	9.224	9.233	0.007					5.23EV71 46-20	VP1	13.52	13.5427	2.063		-11.551	3000.53		0.0374333	0.0368924	0.00215608
47	D11	5.23EV71 46-6	VP1	9.237	9.233	0.007					5.23EV71 46-20	VP1	13.637		2.18		-11.434	2766.79		0.0345173
48	D12	5.23EV71 46-6	VP1	9.237	9.233	0.007					5.23EV71 46-20	VP1	13.471		2.014		-11.6	3104.19		0.0387265
49	E1											GAPDH		#DIV/0!
50	E2											GAPDH
51	E3											GAPDH
52	E4											VP1		#DIV/0!	#DIV/0!		#DIV/0!	#DIV/0!		#DIV/0!	#DIV/0!	#DIV/0!
53	E5											VP1			#DIV/0!		#DIV/0!	#DIV/0!		#DIV/0!
54	E6											VP1			#DIV/0!		#DIV/0!	#DIV/0!		#DIV/0!
55	E7											GAPDH		#DIV/0!
56	E8											GAPDH
57	E9											GAPDH
58	E10											VP1		#DIV/0!	#DIV/0!		#DIV/0!	#DIV/0!		#DIV/0!	#DIV/0!	#DIV/0!
59	E11											VP1			#DIV/0!		#DIV/0!	#DIV/0!		#DIV/0!
60	E12											VP1			#DIV/0!		#DIV/0!	#DIV/0!		#DIV/0!
61	F1											GAPDH		#DIV/0!
62	F2											GAPDH
63	F3											GAPDH
64	F4											VP1		#DIV/0!	#DIV/0!		#DIV/0!	#DIV/0!		#DIV/0!	#DIV/0!	#DIV/0!
65	F5											VP1			#DIV/0!		#DIV/0!	#DIV/0!		#DIV/0!
66	F6											VP1			#DIV/0!		#DIV/0!	#DIV/0!		#DIV/0!
67	F7											GAPDH		#DIV/0!
68	F8											GAPDH
69	F9											GAPDH
70	F10											VP1		#DIV/0!	#DIV/0!		#DIV/0!	#DIV/0!		#DIV/0!	#DIV/0!	#DIV/0!
71	F11											VP1			#DIV/0!		#DIV/0!	#DIV/0!		#DIV/0!
72	F12											VP1			#DIV/0!		#DIV/0!	#DIV/0!		#DIV/0!
73	G1											GAPDH		#DIV/0!
74	G2											GAPDH
75	G3											GAPDH
76	G4											VP1		#DIV/0!	#DIV/0!		#DIV/0!	#DIV/0!		#DIV/0!	#DIV/0!	#DIV/0!
77	G5											VP1			#DIV/0!		#DIV/0!	#DIV/0!		#DIV/0!
78	G6											VP1			#DIV/0!		#DIV/0!	#DIV/0!		#DIV/0!
79	G7											GAPDH		#DIV/0!
80	G8											GAPDH
81	G9											GAPDH
82	G10											VP1		#DIV/0!	#DIV/0!		#DIV/0!	#DIV/0!		#DIV/0!	#DIV/0!	#DIV/0!
83	G11											VP1			#DIV/0!		#DIV/0!	#DIV/0!		#DIV/0!
84	G12											VP1			#DIV/0!		#DIV/0!	#DIV/0!		#DIV/0!
85	H1											GAPDH		#DIV/0!
86	H2											GAPDH
87	H3											GAPDH
88	H4											VP1		#DIV/0!	#DIV/0!		#DIV/0!	#DIV/0!		#DIV/0!	#DIV/0!	#DIV/0!
89	H5											VP1			#DIV/0!		#DIV/0!	#DIV/0!		#DIV/0!
90	H6											VP1			#DIV/0!		#DIV/0!	#DIV/0!		#DIV/0!
91	H7											GAPDH		#DIV/0!
92	H8											GAPDH
93	H9											GAPDH
94	H10											VP1		#DIV/0!	#DIV/0!		#DIV/0!	#DIV/0!		#DIV/0!	#DIV/0!	#DIV/0!
95	H11											VP1			#DIV/0!		#DIV/0!	#DIV/0!		#DIV/0!
96	H12											VP1			#DIV/0!		#DIV/0!	#DIV/0!		#DIV/0!
Analysis Type = Singleplex
Endogenous Control = ACTIN
RQ Min/Max Confidence Level = 95.0
Reference Sample = EV71016160NM

## Sheet: 常用 2-ΔCт模版  2 V作对照
Well	Well Position	Sample Name	Target Name	CT	Ct Mean	Ct SD			Sample Name	Target Name	CT	mean	ΔCT		ΔΔCT	2-ΔΔCT	mean	SD
1	A1	5.23EV71 C1	GAPDH	10.41	9.111	1.167			5.23EV71 C1	GAPDH	10.41	9.111
2	A2	5.23EV71 C1	GAPDH	8.773	9.111	1.167			5.23EV71 C1	GAPDH	8.773
3	A3	5.23EV71 C1	GAPDH	8.15	9.111	1.167			5.23EV71 C1	GAPDH	8.15
4	A4	5.23EV71 C1	VP1	22.708	22.725	0.015			5.23EV71 C1	VP1	22.708	22.725	13.597		16.2733	1.26252e-05	1.24778e-05	1.28352e-07
5	A5	5.23EV71 C1	VP1	22.735	22.725	0.015			5.23EV71 C1	VP1	22.735		13.624		16.3003	1.23911e-05
6	A6	5.23EV71 C1	VP1	22.732	22.725	0.015			5.23EV71 C1	VP1	22.732		13.621		16.2973	1.24169e-05
7	A7	5.23EV71 V1	GAPDH	11.565	11.412	0.17			5.23EV71 V1	GAPDH	11.565	11.4113
8	A8	5.23EV71 V1	GAPDH	11.44	11.412	0.17			5.23EV71 V1	GAPDH	11.44
9	A9	5.23EV71 V1	GAPDH	11.229	11.412	0.17			5.23EV71 V1	GAPDH	11.229
10	A10	5.23EV71 V1	VP1	8.766	8.735	0.03			5.23EV71 V1	VP1	8.766	8.735	-2.64533	-2.67633	0.031	0.978742	1.00014	0.0204971
11	A11	5.23EV71 V1	VP1	8.732	8.735	0.03			5.23EV71 V1	VP1	8.732		-2.67933		-0.003	1.00208
12	A12	5.23EV71 V1	VP1	8.707	8.735	0.03			5.23EV71 V1	VP1	8.707		-2.70433		-0.028	1.0196
13	B1	5.23EV71 46-20	GAPDH	11.557	11.457	0.097			5.23EV71 46-6	GAPDH	11.857	11.862
14	B2	5.23EV71 46-20	GAPDH	11.363	11.457	0.097			5.23EV71 46-6	GAPDH	11.844
15	B3	5.23EV71 46-20	GAPDH	11.451	11.457	0.097			5.23EV71 46-6	GAPDH	11.885
16	B4	5.23EV71 46-20	VP1	13.52	13.543	0.086			5.23EV71 46-6	VP1	9.224	9.23267	-2.638		0.0383333	0.973779	0.967956	0.00504328
17	B5	5.23EV71 46-20	VP1	13.637	13.543	0.086			5.23EV71 46-6	VP1	9.237		-2.625		0.0513333	0.965044
18	B6	5.23EV71 46-20	VP1	13.471	13.543	0.086			5.23EV71 46-6	VP1	9.237		-2.625		0.0513333	0.965044
19	B7	5.23EV71 46-4	GAPDH	11.254	11.117	0.12			5.23EV71 46-32	GAPDH	11.343	11.3093
20	B8	5.23EV71 46-4	GAPDH	11.063	11.117	0.12			5.23EV71 46-32	GAPDH	11.352
21	B9	5.23EV71 46-4	GAPDH	11.033	11.117	0.12			5.23EV71 46-32	GAPDH	11.233
22	B10	5.23EV71 46-4	VP1	13.202	13.142	0.064			5.23EV71 46-32	VP1	9.246	9.232	-2.06333		0.613	0.653836	0.66024	0.00750646
23	B11	5.23EV71 46-4	VP1	13.075	13.142	0.064			5.23EV71 46-32	VP1	9.236		-2.07333		0.603	0.658383
24	B12	5.23EV71 46-4	VP1	13.15	13.142	0.064			5.23EV71 46-32	VP1	9.214		-2.09533		0.581	0.6685
25	C1	5.23EV71 46-800	GAPDH	10.924	10.914	0.086			5.23EV71 46-160	GAPDH	11.108	11.0677
26	C2	5.23EV71 46-800	GAPDH	10.994	10.914	0.086			5.23EV71 46-160	GAPDH	11.107
27	C3	5.23EV71 46-800	GAPDH	10.823	10.914	0.086			5.23EV71 46-160	GAPDH	10.988
28	C4	5.23EV71 46-800	VP1	13.281	13.226	0.095			5.23EV71 46-160	VP1	11.622	11.628	0.554333		3.23067	0.10653	0.106103	0.00216017
29	C5	5.23EV71 46-800	VP1	13.279	13.226	0.095			5.23EV71 46-160	VP1	11.66		0.592333		3.26867	0.103761
30	C6	5.23EV71 46-800	VP1	13.116	13.226	0.095			5.23EV71 46-160	VP1	11.602		0.534333		3.21067	0.108017
31	C7	5.23EV71 46-160	GAPDH	11.108	11.067	0.069			5.23EV71 46-800	GAPDH	10.924	10.9137
32	C8	5.23EV71 46-160	GAPDH	11.107	11.067	0.069			5.23EV71 46-800	GAPDH	10.994
33	C9	5.23EV71 46-160	GAPDH	10.988	11.067	0.069			5.23EV71 46-800	GAPDH	10.823
34	C10	5.23EV71 46-160	VP1	11.622	11.628	0.03			5.23EV71 46-800	VP1	13.281	13.2253	2.36733		5.04367	0.0303183	0.0315569	0.00210889
35	C11	5.23EV71 46-160	VP1	11.66	11.628	0.03			5.23EV71 46-800	VP1	13.279		2.36533		5.04167	0.0303604
36	C12	5.23EV71 46-160	VP1	11.602	11.628	0.03			5.23EV71 46-800	VP1	13.116		2.20233		4.87867	0.0339919
37	D1	5.23EV71 46-32	GAPDH	11.343	11.309	0.066			5.23EV71 46-4	GAPDH	11.254	11.1167
38	D2	5.23EV71 46-32	GAPDH	11.352	11.309	0.066			5.23EV71 46-4	GAPDH	11.063
39	D3	5.23EV71 46-32	GAPDH	11.233	11.309	0.066			5.23EV71 46-4	GAPDH	11.033
40	D4	5.23EV71 46-32	VP1	9.246	9.232	0.016			5.23EV71 46-4	VP1	13.202	13.1423	2.08533		4.76167	0.0368634	0.0384451	0.00170763
41	D5	5.23EV71 46-32	VP1	9.236	9.232	0.016			5.23EV71 46-4	VP1	13.075		1.95833		4.63467	0.0402556
42	D6	5.23EV71 46-32	VP1	9.214	9.232	0.016			5.23EV71 46-4	VP1	13.15		2.03333		4.70967	0.0382163
43	D7	5.23EV71 46-6	GAPDH	11.857	11.862	0.021			5.23EV71 46-20	GAPDH	11.557	11.457
44	D8	5.23EV71 46-6	GAPDH	11.844	11.862	0.021			5.23EV71 46-20	GAPDH	11.363
45	D9	5.23EV71 46-6	GAPDH	11.885	11.862	0.021			5.23EV71 46-20	GAPDH	11.451
46	D10	5.23EV71 46-6	VP1	9.224	9.233	0.007			5.23EV71 46-20	VP1	13.52	13.5427	2.063		4.73933	0.0374385	0.0368975	0.00215639
47	D11	5.23EV71 46-6	VP1	9.237	9.233	0.007			5.23EV71 46-20	VP1	13.637		2.18		4.85633	0.0345222
48	D12	5.23EV71 46-6	VP1	9.237	9.233	0.007			5.23EV71 46-20	VP1	13.471		2.014		4.69033	0.0387319
										GAPDH		#DIV/0!
										GAPDH
										GAPDH
										VP1		#DIV/0!	#DIV/0!		#DIV/0!	#DIV/0!	#DIV/0!	#DIV/0!
										VP1			#DIV/0!		#DIV/0!	#DIV/0!
										VP1			#DIV/0!		#DIV/0!	#DIV/0!
										GAPDH		#DIV/0!
										GAPDH
										GAPDH
										VP1		#DIV/0!	#DIV/0!		#DIV/0!	#DIV/0!	#DIV/0!	#DIV/0!
										VP1			#DIV/0!		#DIV/0!	#DIV/0!
										VP1			#DIV/0!		#DIV/0!	#DIV/0!
										GAPDH		#DIV/0!
										GAPDH
										GAPDH
										VP1		#DIV/0!	#DIV/0!		#DIV/0!	#DIV/0!	#DIV/0!	#DIV/0!
										VP1			#DIV/0!		#DIV/0!	#DIV/0!
										VP1			#DIV/0!		#DIV/0!	#DIV/0!
										GAPDH		#DIV/0!
										GAPDH
										GAPDH
										VP1		#DIV/0!	#DIV/0!		#DIV/0!	#DIV/0!	#DIV/0!	#DIV/0!
										VP1			#DIV/0!		#DIV/0!	#DIV/0!
										VP1			#DIV/0!		#DIV/0!	#DIV/0!
										GAPDH		#DIV/0!
										GAPDH
										GAPDH
										VP1		#DIV/0!	#DIV/0!		#DIV/0!	#DIV/0!	#DIV/0!	#DIV/0!
										VP1			#DIV/0!		#DIV/0!	#DIV/0!
										VP1			#DIV/0!		#DIV/0!	#DIV/0!
										GAPDH		#DIV/0!
										GAPDH
										GAPDH
										VP1		#DIV/0!	#DIV/0!		#DIV/0!	#DIV/0!	#DIV/0!	#DIV/0!
										VP1			#DIV/0!		#DIV/0!	#DIV/0!
										VP1			#DIV/0!		#DIV/0!	#DIV/0!
										GAPDH		#DIV/0!
										GAPDH
										GAPDH
										VP1		#DIV/0!	#DIV/0!		#DIV/0!	#DIV/0!	#DIV/0!	#DIV/0!
										VP1			#DIV/0!		#DIV/0!	#DIV/0!
										VP1			#DIV/0!		#DIV/0!	#DIV/0!
										GAPDH		#DIV/0!
										GAPDH
										GAPDH
										VP1		#DIV/0!	#DIV/0!		#DIV/0!	#DIV/0!	#DIV/0!	#DIV/0!
										VP1			#DIV/0!		#DIV/0!	#DIV/0!
										VP1			#DIV/0!		#DIV/0!	#DIV/0!
