# Supplementary material
Source: Research Square preprint supplement (doi:10.21203/rs.3.rs-8928353/v1)
Supplement: Supplementary file 4 [file 5c6dd6b6a173b840ec08d86b.xlsx]

## Sheet: 2-ΔCт模版  1 C作对照
Well	Well Position	Sample Name	Target Name	CT	Ct Mean	Ct SD					Sample Name	Target Name	CT	mean	ΔCт	mean	ΔΔCт	2-ΔΔCт	mean	相对量计算	mean	SD
1	A1	5.12EV71 48-6	GAPDH	12.371	12.344	0.028					5.12EV71 C1	VP1	23.829	23.9343	11.7603	11.8657	-0.105333	1.07574		0.00011064	0.000103658	1.53771e-05
2	A2	5.12EV71 48-6	GAPDH	12.315	12.344	0.028					5.12EV71 C1	VP1	23.782		11.7133		-0.152333	1.11137		0.000114304
3	A3	5.12EV71 48-6	GAPDH	12.346	12.344	0.028					5.12EV71 C1	VP1	24.192		12.1233		0.257667	0.83644		8.6028e-05
4	A4	5.12EV71 48-6	VP1	11.184	11.208	0.096					5.12EV71 C1	GAPDH	12.146	12.0687
5	A5	5.12EV71 48-6	VP1	11.127	11.208	0.096					5.12EV71 C1	GAPDH	12.021
6	A6	5.12EV71 48-6	VP1	11.314	11.208	0.096					5.12EV71 C1	GAPDH	12.039
7	A7	5.12EV71 48D-160	GAPDH	12.73	12.726	0.058					5.12EV71 V3	VP1	11.01	11.057	-1.426		-13.2917	10027.4	9722.87	1.03133	1	0.0711204
8	A8	5.12EV71 48D-160	GAPDH	12.782	12.726	0.058					5.12EV71 V3	VP1	10.984		-1.452		-13.3177	10209.8		1.05008
9	A9	5.12EV71 48D-160	GAPDH	12.666	12.726	0.058					5.12EV71 V3	VP1	11.177		-1.259		-13.1247	8931.38		0.918594
10	A10	5.12EV71 48D-160	VP1	11.603	12.118	0.838					5.12EV71 V3	GAPDH	12.39	12.436						0
11	A11	5.12EV71 48D-160	VP1	11.667	12.118	0.838					5.12EV71 V3	GAPDH	12.486							0
12	A12	5.12EV71 48D-160	VP1	13.085	12.118	0.838					5.12EV71 V3	GAPDH	12.432							0
13	B1	5.12EV71 48-32	GAPDH	12.162	12.14	0.02					5.12EV71 48-6	VP1	11.184	11.2083	-1.16		-13.0257	8339.05		0.857673	0.84456	0.0554107
14	B2	5.12EV71 48-32	GAPDH	12.124	12.14	0.02					5.12EV71 48-6	VP1	11.127		-1.217		-13.0827	8675.11		0.892237
15	B3	5.12EV71 48-32	GAPDH	12.133	12.14	0.02					5.12EV71 48-6	VP1	11.314		-1.03		-12.8957	7620.48		0.783769
16	B4	5.12EV71 48-32	VP1	11.233	11.242	0.041					5.12EV71 48-6	GAPDH	12.371	12.344
17	B5	5.12EV71 48-32	VP1	11.205	11.242	0.041					5.12EV71 48-6	GAPDH	12.315
18	B6	5.12EV71 48-32	VP1	11.287	11.242	0.041					5.12EV71 48-6	GAPDH	12.346
19	B7	5.12EV71 48D-800	GAPDH	12.931	12.865	0.068					5.12EV71 48D-32	VP1	12.04	12.0533	-0.471667		-12.3373	5174.96		0.532246	0.527442	0.0120229
20	B8	5.12EV71 48D-800	GAPDH	12.868	12.865	0.068					5.12EV71 48D-32	VP1	12.029		-0.482667		-12.3483	5214.57		0.53632
21	B9	5.12EV71 48D-800	GAPDH	12.796	12.865	0.068					5.12EV71 48D-32	VP1	12.091		-0.420667		-12.2863	4995.22		0.51376
22	B10	5.12EV71 48D-800	VP1	12.868	12.954	0.076					5.12EV71 48D-32	GAPDH	12.542	12.5117
23	B11	5.12EV71 48D-800	VP1	12.983	12.954	0.076					5.12EV71 48D-32	GAPDH	12.483
24	B12	5.12EV71 48D-800	VP1	13.01	12.954	0.076					5.12EV71 48D-32	GAPDH	12.51
25	C1	5.12EV71 48-160	GAPDH	12.489	12.459	0.052					5.12EV71 48-160	VP1	12.238	12.3357	-0.221667		-12.0873	4351.61		0.447564	0.418911	0.0284302
26	C2	5.12EV71 48-160	GAPDH	12.49	12.459	0.052					5.12EV71 48-160	VP1	12.434		-0.0256667		-11.8913	3798.81		0.390709
27	C3	5.12EV71 48-160	GAPDH	12.4	12.459	0.052					5.12EV71 48-160	VP1	12.335		-0.124667		-11.9903	4068.65		0.418461
28	C4	5.12EV71 48-160	VP1	12.238	12.336	0.098					5.12EV71 48-160	GAPDH	12.489	12.4597
29	C5	5.12EV71 48-160	VP1	12.434	12.336	0.098					5.12EV71 48-160	GAPDH	12.49
30	C6	5.12EV71 48-160	VP1	12.335	12.336	0.098					5.12EV71 48-160	GAPDH	12.4
31	C7	5.12EV71 48D-4	GAPDH	14.047	14.088	0.038					5.12EV71 48-800	VP1	14.78	14.879	1.99067		-9.875	939.012		0.0965776	0.0903278	0.00646415
32	C8	5.12EV71 48D-4	GAPDH	14.097	14.088	0.038					5.12EV71 48-800	VP1	14.87		2.08067		-9.785	882.223		0.0907369
33	C9	5.12EV71 48D-4	GAPDH	14.121	14.088	0.038					5.12EV71 48-800	VP1	14.987		2.19767		-9.668	813.501		0.0836688
34	C10	5.12EV71 48D-4	VP1	16.7	16.707	0.047					5.12EV71 48-800	GAPDH	12.709	12.7893
35	C11	5.12EV71 48D-4	VP1	16.663	16.707	0.047					5.12EV71 48-800	GAPDH	13.218
36	C12	5.12EV71 48D-4	VP1	16.757	16.707	0.047					5.12EV71 48-800	GAPDH	12.441
37	D1	5.12EV71 48-800	GAPDH	12.709	12.789	0.394					5.12EV71 48D-4	VP1	16.7	16.7067	2.61167		-9.254	610.565		0.0627967	0.0625296	0.00204514
38	D2	5.12EV71 48-800	GAPDH	13.218	12.789	0.394					5.12EV71 48D-4	VP1	16.663		2.57467		-9.291	626.426		0.0644281
39	D3	5.12EV71 48-800	GAPDH	12.441	12.789	0.394					5.12EV71 48D-4	VP1	16.757		2.66867		-9.197	586.912		0.060364
40	D4	5.12EV71 48-800	VP1	14.78	14.879	0.104					5.12EV71 48D-4	GAPDH	14.047	14.0883
41	D5	5.12EV71 48-800	VP1	14.87	14.879	0.104					5.12EV71 48D-4	GAPDH	14.097
42	D6	5.12EV71 48-800	VP1	14.987	14.879	0.104					5.12EV71 48D-4	GAPDH	14.121
43	D7	5.12EV71 48D-20	GAPDH	14.363	14.334	0.056					5.12EV71 48D-20	VP1	20.379	20.4483	6.04467		-5.821	56.5322		0.00581435	0.00554798	0.000324914
44	D8	5.12EV71 48D-20	GAPDH	14.27	14.334	0.056					5.12EV71 48D-20	VP1	20.422		6.08767		-5.778	54.8721		0.00564361
45	D9	5.12EV71 48D-20	GAPDH	14.37	14.334	0.056					5.12EV71 48D-20	VP1	20.544		6.20967		-5.656	50.4226		0.00518598
46	D10	5.12EV71 48D-20	VP1	20.379	20.448	0.086					5.12EV71 48D-20	GAPDH	14.363	14.3343
47	D11	5.12EV71 48D-20	VP1	20.422	20.448	0.086					5.12EV71 48D-20	GAPDH	14.27
48	D12	5.12EV71 48D-20	VP1	20.544	20.448	0.086					5.12EV71 48D-20	GAPDH	14.37
49	E1	5.12EV71 48-4	GAPDH	13.829	13.792	0.04						VP1		#DIV/0!	#DIV/0!		#DIV/0!	#DIV/0!		#DIV/0!	#DIV/0!	#DIV/0!
50	E2	5.12EV71 48-4	GAPDH	13.797	13.792	0.04						VP1			#DIV/0!		#DIV/0!	#DIV/0!		#DIV/0!
51	E3	5.12EV71 48-4	GAPDH	13.75	13.792	0.04						VP1			#DIV/0!		#DIV/0!	#DIV/0!		#DIV/0!
52	E4	5.12EV71 48-4	VP1	15.467	15.395	0.063						GAPDH		#DIV/0!
53	E5	5.12EV71 48-4	VP1	15.352	15.395	0.063						GAPDH
54	E6	5.12EV71 48-4	VP1	15.366	15.395	0.063						GAPDH
55	E7	5.12EV71 V1	GAPDH	12.866	12.811	0.056						VP1		#DIV/0!	#DIV/0!		#DIV/0!	#DIV/0!		#DIV/0!	#DIV/0!	#DIV/0!
56	E8	5.12EV71 V1	GAPDH	12.754	12.811	0.056						VP1			#DIV/0!		#DIV/0!	#DIV/0!		#DIV/0!
57	E9	5.12EV71 V1	GAPDH	12.812	12.811	0.056						VP1			#DIV/0!		#DIV/0!	#DIV/0!		#DIV/0!
58	E10	5.12EV71 V1	VP1	11.112	11.163	0.049						GAPDH		#DIV/0!
59	E11	5.12EV71 V1	VP1	11.169	11.163	0.049						GAPDH
60	E12	5.12EV71 V1	VP1	11.209	11.163	0.049						GAPDH
61	F1	5.12EV71 48-20	GAPDH	14.79	14.796	0.011						VP1		#DIV/0!	#DIV/0!		#DIV/0!	#DIV/0!		#DIV/0!	#DIV/0!	#DIV/0!
62	F2	5.12EV71 48-20	GAPDH	14.809	14.796	0.011						VP1			#DIV/0!		#DIV/0!	#DIV/0!		#DIV/0!
63	F3	5.12EV71 48-20	GAPDH	14.789	14.796	0.011						VP1			#DIV/0!		#DIV/0!	#DIV/0!		#DIV/0!
64	F4	5.12EV71 48-20	VP1	21.767	21.811	0.078						GAPDH		#DIV/0!
65	F5	5.12EV71 48-20	VP1	21.766	21.811	0.078						GAPDH
66	F6	5.12EV71 48-20	VP1	21.901	21.811	0.078						GAPDH
67	F7	5.12EV71 V2	GAPDH	12.982	12.984	0.005						VP1		#DIV/0!	#DIV/0!		#DIV/0!	#DIV/0!		#DIV/0!	#DIV/0!	#DIV/0!
68	F8	5.12EV71 V2	GAPDH	12.99	12.984	0.005						VP1			#DIV/0!		#DIV/0!	#DIV/0!		#DIV/0!
69	F9	5.12EV71 V2	GAPDH	12.98	12.984	0.005						VP1			#DIV/0!		#DIV/0!	#DIV/0!		#DIV/0!
70	F10	5.12EV71 V2	VP1	11.159	11.232	0.071						GAPDH		#DIV/0!
71	F11	5.12EV71 V2	VP1	11.237	11.232	0.071						GAPDH
72	F12	5.12EV71 V2	VP1	11.301	11.232	0.071						GAPDH
73	G1	5.12EV71 48D-6	GAPDH	12.855	12.849	0.034						VP1		#DIV/0!	#DIV/0!		#DIV/0!	#DIV/0!		#DIV/0!	#DIV/0!	#DIV/0!
74	G2	5.12EV71 48D-6	GAPDH	12.879	12.849	0.034						VP1			#DIV/0!		#DIV/0!	#DIV/0!		#DIV/0!
75	G3	5.12EV71 48D-6	GAPDH	12.812	12.849	0.034						VP1			#DIV/0!		#DIV/0!	#DIV/0!		#DIV/0!
76	G4	5.12EV71 48D-6	VP1	11.971	12.01	0.041						GAPDH		#DIV/0!
77	G5	5.12EV71 48D-6	VP1	12.053	12.01	0.041						GAPDH
78	G6	5.12EV71 48D-6	VP1	12.005	12.01	0.041						GAPDH
79	G7	5.12EV71 V3	GAPDH	12.39	12.436	0.048						VP1		#DIV/0!	#DIV/0!		#DIV/0!	#DIV/0!		#DIV/0!	#DIV/0!	#DIV/0!
80	G8	5.12EV71 V3	GAPDH	12.486	12.436	0.048						VP1			#DIV/0!		#DIV/0!	#DIV/0!		#DIV/0!
81	G9	5.12EV71 V3	GAPDH	12.432	12.436	0.048						VP1			#DIV/0!		#DIV/0!	#DIV/0!		#DIV/0!
82	G10	5.12EV71 V3	VP1	11.01	11.057	0.105						GAPDH		#DIV/0!
83	G11	5.12EV71 V3	VP1	10.984	11.057	0.105						GAPDH
84	G12	5.12EV71 V3	VP1	11.177	11.057	0.105						GAPDH
85	H1	5.12EV71 48D-32	GAPDH	12.542	12.512	0.029						VP1		#DIV/0!	#DIV/0!		#DIV/0!	#DIV/0!		#DIV/0!	#DIV/0!	#DIV/0!
86	H2	5.12EV71 48D-32	GAPDH	12.483	12.512	0.029						VP1			#DIV/0!		#DIV/0!	#DIV/0!		#DIV/0!
87	H3	5.12EV71 48D-32	GAPDH	12.51	12.512	0.029						VP1			#DIV/0!		#DIV/0!	#DIV/0!		#DIV/0!
88	H4	5.12EV71 48D-32	VP1	12.04	12.053	0.033						GAPDH		#DIV/0!
89	H5	5.12EV71 48D-32	VP1	12.029	12.053	0.033						GAPDH
90	H6	5.12EV71 48D-32	VP1	12.091	12.053	0.033						GAPDH
91	H7	5.12EV71 C1	GAPDH	12.146	12.069	0.067						VP1		#DIV/0!	#DIV/0!		#DIV/0!	#DIV/0!		#DIV/0!	#DIV/0!	#DIV/0!
92	H8	5.12EV71 C1	GAPDH	12.021	12.069	0.067						VP1			#DIV/0!		#DIV/0!	#DIV/0!		#DIV/0!
93	H9	5.12EV71 C1	GAPDH	12.039	12.069	0.067						VP1			#DIV/0!		#DIV/0!	#DIV/0!		#DIV/0!
94	H10	5.12EV71 C1	VP1	23.829	23.934	0.224						GAPDH		#DIV/0!
95	H11	5.12EV71 C1	VP1	23.782	23.934	0.224						GAPDH
96	H12	5.12EV71 C1	VP1	24.192	23.934	0.224						GAPDH
Analysis Type = Singleplex
Endogenous Control = ACTIN
RQ Min/Max Confidence Level = 95.0
Reference Sample = EV71016160NM

## Sheet: 常用 2-ΔCт模版  1 V作对照
Well	Well Position	Sample Name	Target Name	CT	Ct Mean	Ct SD			Sample Name	Target Name	CT	mean	ΔCT		ΔΔCT	2-ΔΔCT	mean	SD
1	A1	5.12EV71 48-6	GAPDH	12.371	12.344	0.028			c-0-1	hbv	21.402	21.4143	10.4297		-0.0123333	1.00859	1.00222	0.081374
2	A2	5.12EV71 48-6	GAPDH	12.315	12.344	0.028			c-0-1	hbv	21.538		10.5657		0.123667	0.917852
3	A3	5.12EV71 48-6	GAPDH	12.346	12.344	0.028			c-0-1	hbv	21.303		10.3307		-0.111333	1.08023
4	A4	5.12EV71 48-6	VP1	11.184	11.208	0.096			c-0-1	GAPDH	10.981	10.9723
5	A5	5.12EV71 48-6	VP1	11.127	11.208	0.096			c-0-1	GAPDH	10.942
6	A6	5.12EV71 48-6	VP1	11.314	11.208	0.096			c-0-1	GAPDH	10.994
7	A7	5.12EV71 48D-160	GAPDH	12.73	12.726	0.058			c-0-1	hbv	21.402	21.4143	10.4297	10.442	-0.0123333	1.00859	1.00222	0.081374
8	A8	5.12EV71 48D-160	GAPDH	12.782	12.726	0.058			c-0-1	hbv	21.538		10.5657		0.123667	0.917852
9	A9	5.12EV71 48D-160	GAPDH	12.666	12.726	0.058			c-0-1	hbv	21.303		10.3307		-0.111333	1.08023
10	A10	5.12EV71 48D-160	VP1	11.603	12.118	0.838			c-0-1	GAPDH	10.981	10.9723
11	A11	5.12EV71 48D-160	VP1	11.667	12.118	0.838			c-0-1	GAPDH	10.942
12	A12	5.12EV71 48D-160	VP1	13.085	12.118	0.838			c-0-1	GAPDH	10.994
13	B1	5.12EV71 48-32	GAPDH	12.162	12.14	0.02			v-0-1	hbv	15.36	15.261	4.373		-6.069	67.1353	71.9881	4.21216
14	B2	5.12EV71 48-32	GAPDH	12.124	12.14	0.02			v-0-1	hbv	15.206		4.219		-6.223	74.6981
15	B3	5.12EV71 48-32	GAPDH	12.133	12.14	0.02			v-0-1	hbv	15.217		4.23		-6.212	74.1307
16	B4	5.12EV71 48-32	VP1	11.233	11.242	0.041			v-0-1	GAPDH	11.003	10.987
17	B5	5.12EV71 48-32	VP1	11.205	11.242	0.041			v-0-1	GAPDH	10.964
18	B6	5.12EV71 48-32	VP1	11.287	11.242	0.041			v-0-1	GAPDH	10.994
19	B7	5.12EV71 48D-800	GAPDH	12.931	12.865	0.068			v-0.5-3	hbv	14.568	14.5633	3.74833		-6.69367	103.513	103.866	2.32748
20	B8	5.12EV71 48D-800	GAPDH	12.868	12.865	0.068			v-0.5-3	hbv	14.529		3.70933		-6.73267	106.349
21	B9	5.12EV71 48D-800	GAPDH	12.796	12.865	0.068			v-0.5-3	hbv	14.593		3.77333		-6.66867	101.735
22	B10	5.12EV71 48D-800	VP1	12.868	12.954	0.076			v-0.5-3	GAPDH	11.031	10.8197
23	B11	5.12EV71 48D-800	VP1	12.983	12.954	0.076			v-0.5-3	GAPDH	10.729
24	B12	5.12EV71 48D-800	VP1	13.01	12.954	0.076			v-0.5-3	GAPDH	10.699
25	C1	5.12EV71 48-160	GAPDH	12.489	12.459	0.052			v-1-3	hbv	13.974	13.954	3.08		-7.362	164.506	166.82	2.8991
26	C2	5.12EV71 48-160	GAPDH	12.49	12.459	0.052			v-1-3	hbv	13.926		3.032		-7.41	170.072
27	C3	5.12EV71 48-160	GAPDH	12.4	12.459	0.052			v-1-3	hbv	13.962		3.068		-7.374	165.88
28	C4	5.12EV71 48-160	VP1	12.238	12.336	0.098			v-1-3	GAPDH	10.963	10.894
29	C5	5.12EV71 48-160	VP1	12.434	12.336	0.098			v-1-3	GAPDH	10.886
30	C6	5.12EV71 48-160	VP1	12.335	12.336	0.098			v-1-3	GAPDH	10.833
31	C7	5.12EV71 48D-4	GAPDH	14.047	14.088	0.038			v-0-2	hbv	14.798	14.7187	4.07633		-6.36567	82.4625	87.2376	5.48361
32	C8	5.12EV71 48D-4	GAPDH	14.097	14.088	0.038			v-0-2	hbv	14.621		3.89933		-6.54267	93.2264
33	C9	5.12EV71 48D-4	GAPDH	14.121	14.088	0.038			v-0-2	hbv	14.737		4.01533		-6.42667	86.024
34	C10	5.12EV71 48D-4	VP1	16.7	16.707	0.047			v-0-2	GAPDH	10.724	10.7217
35	C11	5.12EV71 48D-4	VP1	16.663	16.707	0.047			v-0-2	GAPDH	10.863
36	C12	5.12EV71 48D-4	VP1	16.757	16.707	0.047			v-0-2	GAPDH	10.578
37	D1	5.12EV71 48-800	GAPDH	12.709	12.789	0.394			v-0.5-3	hbv	14.568	14.5633	3.74833		-6.69367	103.513	103.866	2.32748
38	D2	5.12EV71 48-800	GAPDH	13.218	12.789	0.394			v-0.5-3	hbv	14.529		3.70933		-6.73267	106.349
39	D3	5.12EV71 48-800	GAPDH	12.441	12.789	0.394			v-0.5-3	hbv	14.593		3.77333		-6.66867	101.735
40	D4	5.12EV71 48-800	VP1	14.78	14.879	0.104			v-0.5-3	GAPDH	11.031	10.8197
41	D5	5.12EV71 48-800	VP1	14.87	14.879	0.104			v-0.5-3	GAPDH	10.729
42	D6	5.12EV71 48-800	VP1	14.987	14.879	0.104			v-0.5-3	GAPDH	10.699
43	D7	5.12EV71 48D-20	GAPDH	14.363	14.334	0.056			v-1-1	hbv	13.944	13.961	2.768		-7.674	204.223	201.845	2.98109
44	D8	5.12EV71 48D-20	GAPDH	14.27	14.334	0.056			v-1-1	hbv	13.985		2.809		-7.633	198.501
45	D9	5.12EV71 48D-20	GAPDH	14.37	14.334	0.056			v-1-1	hbv	13.954		2.778		-7.664	202.812
46	D10	5.12EV71 48D-20	VP1	20.379	20.448	0.086			v-1-1	GAPDH	11.008	11.176
47	D11	5.12EV71 48D-20	VP1	20.422	20.448	0.086			v-1-1	GAPDH	11.237
48	D12	5.12EV71 48D-20	VP1	20.544	20.448	0.086			v-1-1	GAPDH	11.283
49	E1	5.12EV71 48-4	GAPDH	13.829	13.792	0.04			c-0-3	hbv	22.079
50	E2	5.12EV71 48-4	GAPDH	13.797	13.792	0.04			c-0-3	hbv	21.875
51	E3	5.12EV71 48-4	GAPDH	13.75	13.792	0.04			c-0-3	hbv	22.004
52	E4	5.12EV71 48-4	VP1	15.467	15.395	0.063			c-0-3	GAPDH	10.77
53	E5	5.12EV71 48-4	VP1	15.352	15.395	0.063			c-0-3	GAPDH	10.869
54	E6	5.12EV71 48-4	VP1	15.366	15.395	0.063			c-0-3	GAPDH	10.969
55	E7	5.12EV71 V1	GAPDH	12.866	12.811	0.056			v-0-3	hbv	14.013
56	E8	5.12EV71 V1	GAPDH	12.754	12.811	0.056			v-0-3	hbv	14.09
57	E9	5.12EV71 V1	GAPDH	12.812	12.811	0.056			v-0-3	hbv	13.984
58	E10	5.12EV71 V1	VP1	11.112	11.163	0.049			v-0-3	GAPDH	10.754
59	E11	5.12EV71 V1	VP1	11.169	11.163	0.049			v-0-3	GAPDH	10.664
60	E12	5.12EV71 V1	VP1	11.209	11.163	0.049			v-0-3	GAPDH	10.887
61	F1	5.12EV71 48-20	GAPDH	14.79	14.796	0.011			v-0.5-3	hbv	14.568
62	F2	5.12EV71 48-20	GAPDH	14.809	14.796	0.011			v-0.5-3	hbv	14.529
63	F3	5.12EV71 48-20	GAPDH	14.789	14.796	0.011			v-0.5-3	hbv	14.593
64	F4	5.12EV71 48-20	VP1	21.767	21.811	0.078			v-0.5-3	GAPDH	11.031
65	F5	5.12EV71 48-20	VP1	21.766	21.811	0.078			v-0.5-3	GAPDH	10.729
66	F6	5.12EV71 48-20	VP1	21.901	21.811	0.078			v-0.5-3	GAPDH	10.699
67	F7	5.12EV71 V2	GAPDH	12.982	12.984	0.005			v-1-3	hbv	13.974
68	F8	5.12EV71 V2	GAPDH	12.99	12.984	0.005			v-1-3	hbv	13.926
69	F9	5.12EV71 V2	GAPDH	12.98	12.984	0.005			v-1-3	hbv	13.962
70	F10	5.12EV71 V2	VP1	11.159	11.232	0.071			v-1-3	GAPDH	10.963
71	F11	5.12EV71 V2	VP1	11.237	11.232	0.071			v-1-3	GAPDH	10.886
72	F12	5.12EV71 V2	VP1	11.301	11.232	0.071			v-1-3	GAPDH	10.833
73	G1	5.12EV71 48D-6	GAPDH	12.855	12.849	0.034
74	G2	5.12EV71 48D-6	GAPDH	12.879	12.849	0.034
75	G3	5.12EV71 48D-6	GAPDH	12.812	12.849	0.034
76	G4	5.12EV71 48D-6	VP1	11.971	12.01	0.041
77	G5	5.12EV71 48D-6	VP1	12.053	12.01	0.041
78	G6	5.12EV71 48D-6	VP1	12.005	12.01	0.041
79	G7	5.12EV71 V3	GAPDH	12.39	12.436	0.048
80	G8	5.12EV71 V3	GAPDH	12.486	12.436	0.048
81	G9	5.12EV71 V3	GAPDH	12.432	12.436	0.048
82	G10	5.12EV71 V3	VP1	11.01	11.057	0.105
83	G11	5.12EV71 V3	VP1	10.984	11.057	0.105
84	G12	5.12EV71 V3	VP1	11.177	11.057	0.105
85	H1	5.12EV71 48D-32	GAPDH	12.542	12.512	0.029
86	H2	5.12EV71 48D-32	GAPDH	12.483	12.512	0.029
87	H3	5.12EV71 48D-32	GAPDH	12.51	12.512	0.029
88	H4	5.12EV71 48D-32	VP1	12.04	12.053	0.033
89	H5	5.12EV71 48D-32	VP1	12.029	12.053	0.033
90	H6	5.12EV71 48D-32	VP1	12.091	12.053	0.033
91	H7	5.12EV71 C1	GAPDH	12.146	12.069	0.067
92	H8	5.12EV71 C1	GAPDH	12.021	12.069	0.067
93	H9	5.12EV71 C1	GAPDH	12.039	12.069	0.067
94	H10	5.12EV71 C1	VP1	23.829	23.934	0.224
95	H11	5.12EV71 C1	VP1	23.782	23.934	0.224
96	H12	5.12EV71 C1	VP1	24.192	23.934	0.224
Analysis Type = Singleplex
Endogenous Control = ACTIN
RQ Min/Max Confidence Level = 95.0
Reference Sample = EV71016160NM

## Sheet: Sheet1
Sample Name	Target Name	CT
c-0-1	hbv	21.402		c-0-1	hbv	21.402		c-0-2	hbv	21.647		c-0-3	hbv	22.079
c-0-1	hbv	21.538		c-0-1	hbv	21.538		c-0-2	hbv	21.904		c-0-3	hbv	21.875
c-0-1	hbv	21.303		c-0-1	hbv	21.303		c-0-2	hbv	21.612		c-0-3	hbv	22.004
c-0-1	GAPDH	10.981		c-0-1	GAPDH	10.981		c-0-2	GAPDH	10.912		c-0-3	GAPDH	10.77
c-0-1	GAPDH	10.942		c-0-1	GAPDH	10.942		c-0-2	GAPDH	10.928		c-0-3	GAPDH	10.869
c-0-1	GAPDH	10.994		c-0-1	GAPDH	10.994		c-0-2	GAPDH	10.923		c-0-3	GAPDH	10.969
v-0.5-3	hbv	14.568		v-0-1	hbv	15.36		v-0-2	hbv	14.798		v-0-3	hbv	14.013
v-0.5-3	hbv	14.529		v-0-1	hbv	15.206		v-0-2	hbv	14.621		v-0-3	hbv	14.09
v-0.5-3	hbv	14.593		v-0-1	hbv	15.217		v-0-2	hbv	14.737		v-0-3	hbv	13.984
v-0.5-3	GAPDH	11.031		v-0-1	GAPDH	11.003		v-0-2	GAPDH	10.724		v-0-3	GAPDH	10.754
v-0.5-3	GAPDH	10.729		v-0-1	GAPDH	10.964		v-0-2	GAPDH	10.863		v-0-3	GAPDH	10.664
v-0.5-3	GAPDH	10.699		v-0-1	GAPDH	10.994		v-0-2	GAPDH	10.578		v-0-3	GAPDH	10.887
c-0-2	hbv	21.647		v-0.5-1	hbv	12.867		v-0.5-2	hbv	15.333		v-0.5-3	hbv	14.568
c-0-2	hbv	21.904		v-0.5-1	hbv	12.751		v-0.5-2	hbv	14.887		v-0.5-3	hbv	14.529
c-0-2	hbv	21.612		v-0.5-1	hbv	12.794		v-0.5-2	hbv	14.928		v-0.5-3	hbv	14.593
c-0-2	GAPDH	10.912		v-0.5-1	GAPDH	11.198		v-0.5-2	GAPDH	10.935		v-0.5-3	GAPDH	11.031
c-0-2	GAPDH	10.928		v-0.5-1	GAPDH	10.994		v-0.5-2	GAPDH	10.936		v-0.5-3	GAPDH	10.729
c-0-2	GAPDH	10.923		v-0.5-1	GAPDH	11.125		v-0.5-2	GAPDH	11.003		v-0.5-3	GAPDH	10.699
v-1-1	hbv	13.944		v-1-1	hbv	13.944		v-1-2	hbv	13.521		v-1-3	hbv	13.974
v-1-1	hbv	13.985		v-1-1	hbv	13.985		v-1-2	hbv	13.694		v-1-3	hbv	13.926
v-1-1	hbv	13.954		v-1-1	hbv	13.954		v-1-2	hbv	13.635		v-1-3	hbv	13.962
v-1-1	GAPDH	11.008		v-1-1	GAPDH	11.008		v-1-2	GAPDH	10.905		v-1-3	GAPDH	10.963
v-1-1	GAPDH	11.237		v-1-1	GAPDH	11.237		v-1-2	GAPDH	10.788		v-1-3	GAPDH	10.886
v-1-1	GAPDH	11.283		v-1-1	GAPDH	11.283		v-1-2	GAPDH	10.904		v-1-3	GAPDH	10.833
c-0-3	hbv	22.079
c-0-3	hbv	21.875
c-0-3	hbv	22.004
c-0-3	GAPDH	10.77
c-0-3	GAPDH	10.869
c-0-3	GAPDH	10.969
v-1-2	hbv	13.521
v-1-2	hbv	13.694
v-1-2	hbv	13.635
v-1-2	GAPDH	10.905
v-1-2	GAPDH	10.788
v-1-2	GAPDH	10.904
v-0-1	hbv	15.36
v-0-1	hbv	15.206
v-0-1	hbv	15.217
v-0-1	GAPDH	11.003
v-0-1	GAPDH	10.964
v-0-1	GAPDH	10.994
v-1-3	hbv	13.974
v-1-3	hbv	13.926
v-1-3	hbv	13.962
v-1-3	GAPDH	10.963
v-1-3	GAPDH	10.886
v-1-3	GAPDH	10.833
v-0-2	hbv	14.798
v-0-2	hbv	14.621
v-0-2	hbv	14.737
v-0-2	GAPDH	10.724
v-0-2	GAPDH	10.863
v-0-2	GAPDH	10.578
v-0-3	hbv	14.013
v-0-3	hbv	14.09
v-0-3	hbv	13.984
v-0-3	GAPDH	10.754
v-0-3	GAPDH	10.664
v-0-3	GAPDH	10.887
v-0.5-1	hbv	12.867
v-0.5-1	hbv	12.751
v-0.5-1	hbv	12.794
v-0.5-1	GAPDH	11.198
v-0.5-1	GAPDH	10.994
v-0.5-1	GAPDH	11.125
v-0.5-2	hbv	15.333
v-0.5-2	hbv	14.887
v-0.5-2	hbv	14.928
v-0.5-2	GAPDH	10.935
v-0.5-2	GAPDH	10.936
v-0.5-2	GAPDH	11.003
4-3	HBV
4-3	HBV
4-3	HBV
4-3	GAPDH
4-3	GAPDH
4-3	GAPDH

## Sheet: 2-ΔCт模版  2 C做对照
Well	Well Position	Sample Name	Target Name	CT	Ct Mean	Ct SD					Sample Name	Target Name	CT	Ct Mean	ΔCт	mean	ΔΔCT	2-ΔΔCт	mean	相对量计算	mean	SD
1	A1	5.23EV71 C1	GAPDH	10.41	9.111	1.167					5.23EV71 C1	GAPDH	10.41	9.111
2	A2	5.23EV71 C1	GAPDH	8.773	9.111	1.167					5.23EV71 C1	GAPDH	8.773
3	A3	5.23EV71 C1	GAPDH	8.15	9.111	1.167					5.23EV71 C1	GAPDH	8.15
4	A4	5.23EV71 C1	VP1	22.708	22.725	0.015					5.23EV71 C1	VP1	22.708	22.725	13.597	13.614	-0.017	1.01185		1.26234e-05	1.2476e-05	1.28334e-07
5	A5	5.23EV71 C1	VP1	22.735	22.725	0.015					5.23EV71 C1	VP1	22.735		13.624		0.01	0.993092		1.23894e-05
6	A6	5.23EV71 C1	VP1	22.732	22.725	0.015					5.23EV71 C1	VP1	22.732		13.621		0.007	0.99516		1.24152e-05
7	A7	5.23EV71 V1	GAPDH	11.565	11.412	0.17					5.23EV71 V1	GAPDH	11.565	11.4113
8	A8	5.23EV71 V1	GAPDH	11.44	11.412	0.17					5.23EV71 V1	GAPDH	11.44
9	A9	5.23EV71 V1	GAPDH	11.229	11.412	0.17					5.23EV71 V1	GAPDH	11.229
10	A10	5.23EV71 V1	VP1	8.766	8.735	0.03					5.23EV71 V1	VP1	8.766	8.735	-2.64533		-16.2593	78441.7	80156.7	0.978604	1	0.0204942
11	A11	5.23EV71 V1	VP1	8.732	8.735	0.03					5.23EV71 V1	VP1	8.732		-2.67933		-16.2933	80312.3		1.00194
12	A12	5.23EV71 V1	VP1	8.707	8.735	0.03					5.23EV71 V1	VP1	8.707		-2.70433		-16.3183	81716.1		1.01945
13	B1	5.23EV71 46-20	GAPDH	11.557	11.457	0.097					5.23EV71 46-6	GAPDH	11.857	11.862
14	B2	5.23EV71 46-20	GAPDH	11.363	11.457	0.097					5.23EV71 46-6	GAPDH	11.844
15	B3	5.23EV71 46-20	GAPDH	11.451	11.457	0.097					5.23EV71 46-6	GAPDH	11.885
16	B4	5.23EV71 46-20	VP1	13.52	13.543	0.086					5.23EV71 46-6	VP1	9.224	9.23267	-2.638		-16.252	78044		0.973643	0.96782	0.00504258
17	B5	5.23EV71 46-20	VP1	13.637	13.543	0.086					5.23EV71 46-6	VP1	9.237		-2.625		-16.239	77343.9		0.964909
18	B6	5.23EV71 46-20	VP1	13.471	13.543	0.086					5.23EV71 46-6	VP1	9.237		-2.625		-16.239	77343.9		0.964909
19	B7	5.23EV71 46-4	GAPDH	11.254	11.117	0.12					5.23EV71 46-32	GAPDH	11.343	11.3093
20	B8	5.23EV71 46-4	GAPDH	11.063	11.117	0.12					5.23EV71 46-32	GAPDH	11.352
21	B9	5.23EV71 46-4	GAPDH	11.033	11.117	0.12					5.23EV71 46-32	GAPDH	11.233
22	B10	5.23EV71 46-4	VP1	13.202	13.142	0.064					5.23EV71 46-32	VP1	9.246	9.232	-2.06333		-15.6773	52402		0.653744	0.660147	0.0075054
23	B11	5.23EV71 46-4	VP1	13.075	13.142	0.064					5.23EV71 46-32	VP1	9.236		-2.07333		-15.6873	52766.5		0.658291
24	B12	5.23EV71 46-4	VP1	13.15	13.142	0.064					5.23EV71 46-32	VP1	9.214		-2.09533		-15.7093	53577.3		0.668406
25	C1	5.23EV71 46-800	GAPDH	10.924	10.914	0.086					5.23EV71 46-160	GAPDH	11.108	11.0677
26	C2	5.23EV71 46-800	GAPDH	10.994	10.914	0.086					5.23EV71 46-160	GAPDH	11.107
27	C3	5.23EV71 46-800	GAPDH	10.823	10.914	0.086					5.23EV71 46-160	GAPDH	10.988
28	C4	5.23EV71 46-800	VP1	13.281	13.226	0.095					5.23EV71 46-160	VP1	11.622	11.628	0.554333		-13.0597	8537.91		0.106515	0.106088	0.00215986
29	C5	5.23EV71 46-800	VP1	13.279	13.226	0.095					5.23EV71 46-160	VP1	11.66		0.592333		-13.0217	8315.96		0.103746
30	C6	5.23EV71 46-800	VP1	13.116	13.226	0.095					5.23EV71 46-160	VP1	11.602		0.534333		-13.0797	8657.09		0.108002
31	C7	5.23EV71 46-160	GAPDH	11.108	11.067	0.069					5.23EV71 46-800	GAPDH	10.924	10.9137
32	C8	5.23EV71 46-160	GAPDH	11.107	11.067	0.069					5.23EV71 46-800	GAPDH	10.994
33	C9	5.23EV71 46-160	GAPDH	10.988	11.067	0.069					5.23EV71 46-800	GAPDH	10.823
34	C10	5.23EV71 46-160	VP1	11.622	11.628	0.03					5.23EV71 46-800	VP1	13.281	13.2253	2.36733		-11.2467	2429.88		0.0303141	0.0315524	0.00210859
35	C11	5.23EV71 46-160	VP1	11.66	11.628	0.03					5.23EV71 46-800	VP1	13.279		2.36533		-11.2487	2433.25		0.0303561
36	C12	5.23EV71 46-160	VP1	11.602	11.628	0.03					5.23EV71 46-800	VP1	13.116		2.20233		-11.4117	2724.29		0.0339871
37	D1	5.23EV71 46-32	GAPDH	11.343	11.309	0.066					5.23EV71 46-4	GAPDH	11.254	11.1167
38	D2	5.23EV71 46-32	GAPDH	11.352	11.309	0.066					5.23EV71 46-4	GAPDH	11.063
39	D3	5.23EV71 46-32	GAPDH	11.233	11.309	0.066					5.23EV71 46-4	GAPDH	11.033
40	D4	5.23EV71 46-32	VP1	9.246	9.232	0.016					5.23EV71 46-4	VP1	13.202	13.1423	2.08533		-11.5287	2954.44		0.0368582	0.0384397	0.00170739
41	D5	5.23EV71 46-32	VP1	9.236	9.232	0.016					5.23EV71 46-4	VP1	13.075		1.95833		-11.6557	3226.3		0.04025
42	D6	5.23EV71 46-32	VP1	9.214	9.232	0.016					5.23EV71 46-4	VP1	13.15		2.03333		-11.5807	3062.87		0.038211
43	D7	5.23EV71 46-6	GAPDH	11.857	11.862	0.021					5.23EV71 46-20	GAPDH	11.557	11.457
44	D8	5.23EV71 46-6	GAPDH	11.844	11.862	0.021					5.23EV71 46-20	GAPDH	11.363
45	D9	5.23EV71 46-6	GAPDH	11.885	11.862	0.021					5.23EV71 46-20	GAPDH	11.451
46	D10	5.23EV71 46-6	VP1	9.224	9.233	0.007					5.23EV71 46-20	VP1	13.52	13.5427	2.063		-11.551	3000.53		0.0374333	0.0368924	0.00215608
47	D11	5.23EV71 46-6	VP1	9.237	9.233	0.007					5.23EV71 46-20	VP1	13.637		2.18		-11.434	2766.79		0.0345173
48	D12	5.23EV71 46-6	VP1	9.237	9.233	0.007					5.23EV71 46-20	VP1	13.471		2.014		-11.6	3104.19		0.0387265
49	E1											GAPDH		#DIV/0!
50	E2											GAPDH
51	E3											GAPDH
52	E4											VP1		#DIV/0!	#DIV/0!		#DIV/0!	#DIV/0!		#DIV/0!	#DIV/0!	#DIV/0!
53	E5											VP1			#DIV/0!		#DIV/0!	#DIV/0!		#DIV/0!
54	E6											VP1			#DIV/0!		#DIV/0!	#DIV/0!		#DIV/0!
55	E7											GAPDH		#DIV/0!
56	E8											GAPDH
57	E9											GAPDH
58	E10											VP1		#DIV/0!	#DIV/0!		#DIV/0!	#DIV/0!		#DIV/0!	#DIV/0!	#DIV/0!
59	E11											VP1			#DIV/0!		#DIV/0!	#DIV/0!		#DIV/0!
60	E12											VP1			#DIV/0!		#DIV/0!	#DIV/0!		#DIV/0!
61	F1											GAPDH		#DIV/0!
62	F2											GAPDH
63	F3											GAPDH
64	F4											VP1		#DIV/0!	#DIV/0!		#DIV/0!	#DIV/0!		#DIV/0!	#DIV/0!	#DIV/0!
65	F5											VP1			#DIV/0!		#DIV/0!	#DIV/0!		#DIV/0!
66	F6											VP1			#DIV/0!		#DIV/0!	#DIV/0!		#DIV/0!
67	F7											GAPDH		#DIV/0!
68	F8											GAPDH
69	F9											GAPDH
70	F10											VP1		#DIV/0!	#DIV/0!		#DIV/0!	#DIV/0!		#DIV/0!	#DIV/0!	#DIV/0!
71	F11											VP1			#DIV/0!		#DIV/0!	#DIV/0!		#DIV/0!
72	F12											VP1			#DIV/0!		#DIV/0!	#DIV/0!		#DIV/0!
73	G1											GAPDH		#DIV/0!
74	G2											GAPDH
75	G3											GAPDH
76	G4											VP1		#DIV/0!	#DIV/0!		#DIV/0!	#DIV/0!		#DIV/0!	#DIV/0!	#DIV/0!
77	G5											VP1			#DIV/0!		#DIV/0!	#DIV/0!		#DIV/0!
78	G6											VP1			#DIV/0!		#DIV/0!	#DIV/0!		#DIV/0!
79	G7											GAPDH		#DIV/0!
80	G8											GAPDH
81	G9											GAPDH
82	G10											VP1		#DIV/0!	#DIV/0!		#DIV/0!	#DIV/0!		#DIV/0!	#DIV/0!	#DIV/0!
83	G11											VP1			#DIV/0!		#DIV/0!	#DIV/0!		#DIV/0!
84	G12											VP1			#DIV/0!		#DIV/0!	#DIV/0!		#DIV/0!
85	H1											GAPDH		#DIV/0!
86	H2											GAPDH
87	H3											GAPDH
88	H4											VP1		#DIV/0!	#DIV/0!		#DIV/0!	#DIV/0!		#DIV/0!	#DIV/0!	#DIV/0!
89	H5											VP1			#DIV/0!		#DIV/0!	#DIV/0!		#DIV/0!
90	H6											VP1			#DIV/0!		#DIV/0!	#DIV/0!		#DIV/0!
91	H7											GAPDH		#DIV/0!
92	H8											GAPDH
93	H9											GAPDH
94	H10											VP1		#DIV/0!	#DIV/0!		#DIV/0!	#DIV/0!		#DIV/0!	#DIV/0!	#DIV/0!
95	H11											VP1			#DIV/0!		#DIV/0!	#DIV/0!		#DIV/0!
96	H12											VP1			#DIV/0!		#DIV/0!	#DIV/0!		#DIV/0!
Analysis Type = Singleplex
Endogenous Control = ACTIN
RQ Min/Max Confidence Level = 95.0
Reference Sample = EV71016160NM

## Sheet: 常用 2-ΔCт模版  2 V作对照
Well	Well Position	Sample Name	Target Name	CT	Ct Mean	Ct SD			Sample Name	Target Name	CT	mean	ΔCT		ΔΔCT	2-ΔΔCT	mean	SD
1	A1	5.23EV71 C1	GAPDH	10.41	9.111	1.167			5.23EV71 C1	GAPDH	10.41	9.111
2	A2	5.23EV71 C1	GAPDH	8.773	9.111	1.167			5.23EV71 C1	GAPDH	8.773
3	A3	5.23EV71 C1	GAPDH	8.15	9.111	1.167			5.23EV71 C1	GAPDH	8.15
4	A4	5.23EV71 C1	VP1	22.708	22.725	0.015			5.23EV71 C1	VP1	22.708	22.725	13.597		16.2733	1.26252e-05	1.24778e-05	1.28352e-07
5	A5	5.23EV71 C1	VP1	22.735	22.725	0.015			5.23EV71 C1	VP1	22.735		13.624		16.3003	1.23911e-05
6	A6	5.23EV71 C1	VP1	22.732	22.725	0.015			5.23EV71 C1	VP1	22.732		13.621		16.2973	1.24169e-05
7	A7	5.23EV71 V1	GAPDH	11.565	11.412	0.17			5.23EV71 V1	GAPDH	11.565	11.4113
8	A8	5.23EV71 V1	GAPDH	11.44	11.412	0.17			5.23EV71 V1	GAPDH	11.44
9	A9	5.23EV71 V1	GAPDH	11.229	11.412	0.17			5.23EV71 V1	GAPDH	11.229
10	A10	5.23EV71 V1	VP1	8.766	8.735	0.03			5.23EV71 V1	VP1	8.766	8.735	-2.64533	-2.67633	0.031	0.978742	1.00014	0.0204971
11	A11	5.23EV71 V1	VP1	8.732	8.735	0.03			5.23EV71 V1	VP1	8.732		-2.67933		-0.003	1.00208
12	A12	5.23EV71 V1	VP1	8.707	8.735	0.03			5.23EV71 V1	VP1	8.707		-2.70433		-0.028	1.0196
13	B1	5.23EV71 46-20	GAPDH	11.557	11.457	0.097			5.23EV71 46-6	GAPDH	11.857	11.862
14	B2	5.23EV71 46-20	GAPDH	11.363	11.457	0.097			5.23EV71 46-6	GAPDH	11.844
15	B3	5.23EV71 46-20	GAPDH	11.451	11.457	0.097			5.23EV71 46-6	GAPDH	11.885
16	B4	5.23EV71 46-20	VP1	13.52	13.543	0.086			5.23EV71 46-6	VP1	9.224	9.23267	-2.638		0.0383333	0.973779	0.967956	0.00504328
17	B5	5.23EV71 46-20	VP1	13.637	13.543	0.086			5.23EV71 46-6	VP1	9.237		-2.625		0.0513333	0.965044
18	B6	5.23EV71 46-20	VP1	13.471	13.543	0.086			5.23EV71 46-6	VP1	9.237		-2.625		0.0513333	0.965044
19	B7	5.23EV71 46-4	GAPDH	11.254	11.117	0.12			5.23EV71 46-32	GAPDH	11.343	11.3093
20	B8	5.23EV71 46-4	GAPDH	11.063	11.117	0.12			5.23EV71 46-32	GAPDH	11.352
21	B9	5.23EV71 46-4	GAPDH	11.033	11.117	0.12			5.23EV71 46-32	GAPDH	11.233
22	B10	5.23EV71 46-4	VP1	13.202	13.142	0.064			5.23EV71 46-32	VP1	9.246	9.232	-2.06333		0.613	0.653836	0.66024	0.00750646
23	B11	5.23EV71 46-4	VP1	13.075	13.142	0.064			5.23EV71 46-32	VP1	9.236		-2.07333		0.603	0.658383
24	B12	5.23EV71 46-4	VP1	13.15	13.142	0.064			5.23EV71 46-32	VP1	9.214		-2.09533		0.581	0.6685
25	C1	5.23EV71 46-800	GAPDH	10.924	10.914	0.086			5.23EV71 46-160	GAPDH	11.108	11.0677
26	C2	5.23EV71 46-800	GAPDH	10.994	10.914	0.086			5.23EV71 46-160	GAPDH	11.107
27	C3	5.23EV71 46-800	GAPDH	10.823	10.914	0.086			5.23EV71 46-160	GAPDH	10.988
28	C4	5.23EV71 46-800	VP1	13.281	13.226	0.095			5.23EV71 46-160	VP1	11.622	11.628	0.554333		3.23067	0.10653	0.106103	0.00216017
29	C5	5.23EV71 46-800	VP1	13.279	13.226	0.095			5.23EV71 46-160	VP1	11.66		0.592333		3.26867	0.103761
30	C6	5.23EV71 46-800	VP1	13.116	13.226	0.095			5.23EV71 46-160	VP1	11.602		0.534333		3.21067	0.108017
31	C7	5.23EV71 46-160	GAPDH	11.108	11.067	0.069			5.23EV71 46-800	GAPDH	10.924	10.9137
32	C8	5.23EV71 46-160	GAPDH	11.107	11.067	0.069			5.23EV71 46-800	GAPDH	10.994
33	C9	5.23EV71 46-160	GAPDH	10.988	11.067	0.069			5.23EV71 46-800	GAPDH	10.823
34	C10	5.23EV71 46-160	VP1	11.622	11.628	0.03			5.23EV71 46-800	VP1	13.281	13.2253	2.36733		5.04367	0.0303183	0.0315569	0.00210889
35	C11	5.23EV71 46-160	VP1	11.66	11.628	0.03			5.23EV71 46-800	VP1	13.279		2.36533		5.04167	0.0303604
36	C12	5.23EV71 46-160	VP1	11.602	11.628	0.03			5.23EV71 46-800	VP1	13.116		2.20233		4.87867	0.0339919
37	D1	5.23EV71 46-32	GAPDH	11.343	11.309	0.066			5.23EV71 46-4	GAPDH	11.254	11.1167
38	D2	5.23EV71 46-32	GAPDH	11.352	11.309	0.066			5.23EV71 46-4	GAPDH	11.063
39	D3	5.23EV71 46-32	GAPDH	11.233	11.309	0.066			5.23EV71 46-4	GAPDH	11.033
40	D4	5.23EV71 46-32	VP1	9.246	9.232	0.016			5.23EV71 46-4	VP1	13.202	13.1423	2.08533		4.76167	0.0368634	0.0384451	0.00170763
41	D5	5.23EV71 46-32	VP1	9.236	9.232	0.016			5.23EV71 46-4	VP1	13.075		1.95833		4.63467	0.0402556
42	D6	5.23EV71 46-32	VP1	9.214	9.232	0.016			5.23EV71 46-4	VP1	13.15		2.03333		4.70967	0.0382163
43	D7	5.23EV71 46-6	GAPDH	11.857	11.862	0.021			5.23EV71 46-20	GAPDH	11.557	11.457
44	D8	5.23EV71 46-6	GAPDH	11.844	11.862	0.021			5.23EV71 46-20	GAPDH	11.363
45	D9	5.23EV71 46-6	GAPDH	11.885	11.862	0.021			5.23EV71 46-20	GAPDH	11.451
46	D10	5.23EV71 46-6	VP1	9.224	9.233	0.007			5.23EV71 46-20	VP1	13.52	13.5427	2.063		4.73933	0.0374385	0.0368975	0.00215639
47	D11	5.23EV71 46-6	VP1	9.237	9.233	0.007			5.23EV71 46-20	VP1	13.637		2.18		4.85633	0.0345222
48	D12	5.23EV71 46-6	VP1	9.237	9.233	0.007			5.23EV71 46-20	VP1	13.471		2.014		4.69033	0.0387319
										GAPDH		#DIV/0!
										GAPDH
										GAPDH
										VP1		#DIV/0!	#DIV/0!		#DIV/0!	#DIV/0!	#DIV/0!	#DIV/0!
										VP1			#DIV/0!		#DIV/0!	#DIV/0!
										VP1			#DIV/0!		#DIV/0!	#DIV/0!
										GAPDH		#DIV/0!
										GAPDH
										GAPDH
										VP1		#DIV/0!	#DIV/0!		#DIV/0!	#DIV/0!	#DIV/0!	#DIV/0!
										VP1			#DIV/0!		#DIV/0!	#DIV/0!
										VP1			#DIV/0!		#DIV/0!	#DIV/0!
										GAPDH		#DIV/0!
										GAPDH
										GAPDH
										VP1		#DIV/0!	#DIV/0!		#DIV/0!	#DIV/0!	#DIV/0!	#DIV/0!
										VP1			#DIV/0!		#DIV/0!	#DIV/0!
										VP1			#DIV/0!		#DIV/0!	#DIV/0!
										GAPDH		#DIV/0!
										GAPDH
										GAPDH
										VP1		#DIV/0!	#DIV/0!		#DIV/0!	#DIV/0!	#DIV/0!	#DIV/0!
										VP1			#DIV/0!		#DIV/0!	#DIV/0!
										VP1			#DIV/0!		#DIV/0!	#DIV/0!
										GAPDH		#DIV/0!
										GAPDH
										GAPDH
										VP1		#DIV/0!	#DIV/0!		#DIV/0!	#DIV/0!	#DIV/0!	#DIV/0!
										VP1			#DIV/0!		#DIV/0!	#DIV/0!
										VP1			#DIV/0!		#DIV/0!	#DIV/0!
										GAPDH		#DIV/0!
										GAPDH
										GAPDH
										VP1		#DIV/0!	#DIV/0!		#DIV/0!	#DIV/0!	#DIV/0!	#DIV/0!
										VP1			#DIV/0!		#DIV/0!	#DIV/0!
										VP1			#DIV/0!		#DIV/0!	#DIV/0!
										GAPDH		#DIV/0!
										GAPDH
										GAPDH
										VP1		#DIV/0!	#DIV/0!		#DIV/0!	#DIV/0!	#DIV/0!	#DIV/0!
										VP1			#DIV/0!		#DIV/0!	#DIV/0!
										VP1			#DIV/0!		#DIV/0!	#DIV/0!
										GAPDH		#DIV/0!
										GAPDH
										GAPDH
										VP1		#DIV/0!	#DIV/0!		#DIV/0!	#DIV/0!	#DIV/0!	#DIV/0!
										VP1			#DIV/0!		#DIV/0!	#DIV/0!
										VP1			#DIV/0!		#DIV/0!	#DIV/0!
