# Supplementary material
Source: Research Square preprint supplement (doi:10.21203/rs.3.rs-8928353/v1)
Supplement: Supplementary file 5 [file 84c1e79916b9b6aace79a113.xlsx]

## Sheet: 2-ΔCт模版  1 C作对照
Well	Well Position	Sample Name	Target Name	CT	Ct Mean	Ct SD					Sample Name	Target Name	CT	mean	ΔCт	mean	ΔΔCт	2-ΔΔCт	mean	相对量计算	mean	SD
1	A1	5.12EV71 48-6	GAPDH	12.371	12.344	0.028					5.12EV71 C1	VP1	23.829	23.9343	11.7603	11.8657	-0.105333	1.07574		0.00011064	0.000103658	1.53771e-05
2	A2	5.12EV71 48-6	GAPDH	12.315	12.344	0.028					5.12EV71 C1	VP1	23.782		11.7133		-0.152333	1.11137		0.000114304
3	A3	5.12EV71 48-6	GAPDH	12.346	12.344	0.028					5.12EV71 C1	VP1	24.192		12.1233		0.257667	0.83644		8.6028e-05
4	A4	5.12EV71 48-6	VP1	11.184	11.208	0.096					5.12EV71 C1	GAPDH	12.146	12.0687
5	A5	5.12EV71 48-6	VP1	11.127	11.208	0.096					5.12EV71 C1	GAPDH	12.021
6	A6	5.12EV71 48-6	VP1	11.314	11.208	0.096					5.12EV71 C1	GAPDH	12.039
7	A7	5.12EV71 48D-160	GAPDH	12.73	12.726	0.058					5.12EV71 V3	VP1	11.01	11.057	-1.426		-13.2917	10027.4	9722.87	1.03133	1	0.0711204
8	A8	5.12EV71 48D-160	GAPDH	12.782	12.726	0.058					5.12EV71 V3	VP1	10.984		-1.452		-13.3177	10209.8		1.05008
9	A9	5.12EV71 48D-160	GAPDH	12.666	12.726	0.058					5.12EV71 V3	VP1	11.177		-1.259		-13.1247	8931.38		0.918594
10	A10	5.12EV71 48D-160	VP1	11.603	12.118	0.838					5.12EV71 V3	GAPDH	12.39	12.436						0
11	A11	5.12EV71 48D-160	VP1	11.667	12.118	0.838					5.12EV71 V3	GAPDH	12.486							0
12	A12	5.12EV71 48D-160	VP1	13.085	12.118	0.838					5.12EV71 V3	GAPDH	12.432							0
13	B1	5.12EV71 48-32	GAPDH	12.162	12.14	0.02					5.12EV71 48-6	VP1	11.184	11.2083	-1.16		-13.0257	8339.05		0.857673	0.84456	0.0554107
14	B2	5.12EV71 48-32	GAPDH	12.124	12.14	0.02					5.12EV71 48-6	VP1	11.127		-1.217		-13.0827	8675.11		0.892237
15	B3	5.12EV71 48-32	GAPDH	12.133	12.14	0.02					5.12EV71 48-6	VP1	11.314		-1.03		-12.8957	7620.48		0.783769
16	B4	5.12EV71 48-32	VP1	11.233	11.242	0.041					5.12EV71 48-6	GAPDH	12.371	12.344
17	B5	5.12EV71 48-32	VP1	11.205	11.242	0.041					5.12EV71 48-6	GAPDH	12.315
18	B6	5.12EV71 48-32	VP1	11.287	11.242	0.041					5.12EV71 48-6	GAPDH	12.346
19	B7	5.12EV71 48D-800	GAPDH	12.931	12.865	0.068					5.12EV71 48D-32	VP1	12.04	12.0533	-0.471667		-12.3373	5174.96		0.532246	0.527442	0.0120229
20	B8	5.12EV71 48D-800	GAPDH	12.868	12.865	0.068					5.12EV71 48D-32	VP1	12.029		-0.482667		-12.3483	5214.57		0.53632
21	B9	5.12EV71 48D-800	GAPDH	12.796	12.865	0.068					5.12EV71 48D-32	VP1	12.091		-0.420667		-12.2863	4995.22		0.51376
22	B10	5.12EV71 48D-800	VP1	12.868	12.954	0.076					5.12EV71 48D-32	GAPDH	12.542	12.5117
23	B11	5.12EV71 48D-800	VP1	12.983	12.954	0.076					5.12EV71 48D-32	GAPDH	12.483
24	B12	5.12EV71 48D-800	VP1	13.01	12.954	0.076					5.12EV71 48D-32	GAPDH	12.51
25	C1	5.12EV71 48-160	GAPDH	12.489	12.459	0.052					5.12EV71 48-160	VP1	12.238	12.3357	-0.221667		-12.0873	4351.61		0.447564	0.418911	0.0284302
26	C2	5.12EV71 48-160	GAPDH	12.49	12.459	0.052					5.12EV71 48-160	VP1	12.434		-0.0256667		-11.8913	3798.81		0.390709
27	C3	5.12EV71 48-160	GAPDH	12.4	12.459	0.052					5.12EV71 48-160	VP1	12.335		-0.124667		-11.9903	4068.65		0.418461
28	C4	5.12EV71 48-160	VP1	12.238	12.336	0.098					5.12EV71 48-160	GAPDH	12.489	12.4597
29	C5	5.12EV71 48-160	VP1	12.434	12.336	0.098					5.12EV71 48-160	GAPDH	12.49
30	C6	5.12EV71 48-160	VP1	12.335	12.336	0.098					5.12EV71 48-160	GAPDH	12.4
31	C7	5.12EV71 48D-4	GAPDH	14.047	14.088	0.038					5.12EV71 48-800	VP1	14.78	14.879	1.99067		-9.875	939.012		0.0965776	0.0903278	0.00646415
32	C8	5.12EV71 48D-4	GAPDH	14.097	14.088	0.038					5.12EV71 48-800	VP1	14.87		2.08067		-9.785	882.223		0.0907369
33	C9	5.12EV71 48D-4	GAPDH	14.121	14.088	0.038					5.12EV71 48-800	VP1	14.987		2.19767		-9.668	813.501		0.0836688
34	C10	5.12EV71 48D-4	VP1	16.7	16.707	0.047					5.12EV71 48-800	GAPDH	12.709	12.7893
35	C11	5.12EV71 48D-4	VP1	16.663	16.707	0.047					5.12EV71 48-800	GAPDH	13.218
36	C12	5.12EV71 48D-4	VP1	16.757	16.707	0.047					5.12EV71 48-800	GAPDH	12.441
37	D1	5.12EV71 48-800	GAPDH	12.709	12.789	0.394					5.12EV71 48D-4	VP1	16.7	16.7067	2.61167		-9.254	610.565		0.0627967	0.0625296	0.00204514
38	D2	5.12EV71 48-800	GAPDH	13.218	12.789	0.394					5.12EV71 48D-4	VP1	16.663		2.57467		-9.291	626.426		0.0644281
39	D3	5.12EV71 48-800	GAPDH	12.441	12.789	0.394					5.12EV71 48D-4	VP1	16.757		2.66867		-9.197	586.912		0.060364
40	D4	5.12EV71 48-800	VP1	14.78	14.879	0.104					5.12EV71 48D-4	GAPDH	14.047	14.0883
41	D5	5.12EV71 48-800	VP1	14.87	14.879	0.104					5.12EV71 48D-4	GAPDH	14.097
42	D6	5.12EV71 48-800	VP1	14.987	14.879	0.104					5.12EV71 48D-4	GAPDH	14.121
43	D7	5.12EV71 48D-20	GAPDH	14.363	14.334	0.056					5.12EV71 48D-20	VP1	20.379	20.4483	6.04467		-5.821	56.5322		0.00581435	0.00554798	0.000324914
44	D8	5.12EV71 48D-20	GAPDH	14.27	14.334	0.056					5.12EV71 48D-20	VP1	20.422		6.08767		-5.778	54.8721		0.00564361
45	D9	5.12EV71 48D-20	GAPDH	14.37	14.334	0.056					5.12EV71 48D-20	VP1	20.544		6.20967		-5.656	50.4226		0.00518598
46	D10	5.12EV71 48D-20	VP1	20.379	20.448	0.086					5.12EV71 48D-20	GAPDH	14.363	14.3343
47	D11	5.12EV71 48D-20	VP1	20.422	20.448	0.086					5.12EV71 48D-20	GAPDH	14.27
48	D12	5.12EV71 48D-20	VP1	20.544	20.448	0.086					5.12EV71 48D-20	GAPDH	14.37
49	E1	5.12EV71 48-4	GAPDH	13.829	13.792	0.04						VP1		#DIV/0!	#DIV/0!		#DIV/0!	#DIV/0!		#DIV/0!	#DIV/0!	#DIV/0!
50	E2	5.12EV71 48-4	GAPDH	13.797	13.792	0.04						VP1			#DIV/0!		#DIV/0!	#DIV/0!		#DIV/0!
51	E3	5.12EV71 48-4	GAPDH	13.75	13.792	0.04						VP1			#DIV/0!		#DIV/0!	#DIV/0!		#DIV/0!
52	E4	5.12EV71 48-4	VP1	15.467	15.395	0.063						GAPDH		#DIV/0!
53	E5	5.12EV71 48-4	VP1	15.352	15.395	0.063						GAPDH
54	E6	5.12EV71 48-4	VP1	15.366	15.395	0.063						GAPDH
55	E7	5.12EV71 V1	GAPDH	12.866	12.811	0.056						VP1		#DIV/0!	#DIV/0!		#DIV/0!	#DIV/0!		#DIV/0!	#DIV/0!	#DIV/0!
56	E8	5.12EV71 V1	GAPDH	12.754	12.811	0.056						VP1			#DIV/0!		#DIV/0!	#DIV/0!		#DIV/0!
57	E9	5.12EV71 V1	GAPDH	12.812	12.811	0.056						VP1			#DIV/0!		#DIV/0!	#DIV/0!		#DIV/0!
58	E10	5.12EV71 V1	VP1	11.112	11.163	0.049						GAPDH		#DIV/0!
59	E11	5.12EV71 V1	VP1	11.169	11.163	0.049						GAPDH
60	E12	5.12EV71 V1	VP1	11.209	11.163	0.049						GAPDH
61	F1	5.12EV71 48-20	GAPDH	14.79	14.796	0.011						VP1		#DIV/0!	#DIV/0!		#DIV/0!	#DIV/0!		#DIV/0!	#DIV/0!	#DIV/0!
62	F2	5.12EV71 48-20	GAPDH	14.809	14.796	0.011						VP1			#DIV/0!		#DIV/0!	#DIV/0!		#DIV/0!
63	F3	5.12EV71 48-20	GAPDH	14.789	14.796	0.011						VP1			#DIV/0!		#DIV/0!	#DIV/0!		#DIV/0!
64	F4	5.12EV71 48-20	VP1	21.767	21.811	0.078						GAPDH		#DIV/0!
65	F5	5.12EV71 48-20	VP1	21.766	21.811	0.078						GAPDH
66	F6	5.12EV71 48-20	VP1	21.901	21.811	0.078						GAPDH
67	F7	5.12EV71 V2	GAPDH	12.982	12.984	0.005						VP1		#DIV/0!	#DIV/0!		#DIV/0!	#DIV/0!		#DIV/0!	#DIV/0!	#DIV/0!
68	F8	5.12EV71 V2	GAPDH	12.99	12.984	0.005						VP1			#DIV/0!		#DIV/0!	#DIV/0!		#DIV/0!
69	F9	5.12EV71 V2	GAPDH	12.98	12.984	0.005						VP1			#DIV/0!		#DIV/0!	#DIV/0!		#DIV/0!
70	F10	5.12EV71 V2	VP1	11.159	11.232	0.071						GAPDH		#DIV/0!
71	F11	5.12EV71 V2	VP1	11.237	11.232	0.071						GAPDH
72	F12	5.12EV71 V2	VP1	11.301	11.232	0.071						GAPDH
73	G1	5.12EV71 48D-6	GAPDH	12.855	12.849	0.034						VP1		#DIV/0!	#DIV/0!		#DIV/0!	#DIV/0!		#DIV/0!	#DIV/0!	#DIV/0!
74	G2	5.12EV71 48D-6	GAPDH	12.879	12.849	0.034						VP1			#DIV/0!		#DIV/0!	#DIV/0!		#DIV/0!
75	G3	5.12EV71 48D-6	GAPDH	12.812	12.849	0.034						VP1			#DIV/0!		#DIV/0!	#DIV/0!		#DIV/0!
76	G4	5.12EV71 48D-6	VP1	11.971	12.01	0.041						GAPDH		#DIV/0!
77	G5	5.12EV71 48D-6	VP1	12.053	12.01	0.041						GAPDH
78	G6	5.12EV71 48D-6	VP1	12.005	12.01	0.041						GAPDH
79	G7	5.12EV71 V3	GAPDH	12.39	12.436	0.048						VP1		#DIV/0!	#DIV/0!		#DIV/0!	#DIV/0!		#DIV/0!	#DIV/0!	#DIV/0!
80	G8	5.12EV71 V3	GAPDH	12.486	12.436	0.048						VP1			#DIV/0!		#DIV/0!	#DIV/0!		#DIV/0!
81	G9	5.12EV71 V3	GAPDH	12.432	12.436	0.048						VP1			#DIV/0!		#DIV/0!	#DIV/0!		#DIV/0!
82	G10	5.12EV71 V3	VP1	11.01	11.057	0.105						GAPDH		#DIV/0!
83	G11	5.12EV71 V3	VP1	10.984	11.057	0.105						GAPDH
84	G12	5.12EV71 V3	VP1	11.177	11.057	0.105						GAPDH
85	H1	5.12EV71 48D-32	GAPDH	12.542	12.512	0.029						VP1		#DIV/0!	#DIV/0!		#DIV/0!	#DIV/0!		#DIV/0!	#DIV/0!	#DIV/0!
86	H2	5.12EV71 48D-32	GAPDH	12.483	12.512	0.029						VP1			#DIV/0!		#DIV/0!	#DIV/0!		#DIV/0!
87	H3	5.12EV71 48D-32	GAPDH	12.51	12.512	0.029						VP1			#DIV/0!		#DIV/0!	#DIV/0!		#DIV/0!
88	H4	5.12EV71 48D-32	VP1	12.04	12.053	0.033						GAPDH		#DIV/0!
89	H5	5.12EV71 48D-32	VP1	12.029	12.053	0.033						GAPDH
90	H6	5.12EV71 48D-32	VP1	12.091	12.053	0.033						GAPDH
91	H7	5.12EV71 C1	GAPDH	12.146	12.069	0.067						VP1		#DIV/0!	#DIV/0!		#DIV/0!	#DIV/0!		#DIV/0!	#DIV/0!	#DIV/0!
92	H8	5.12EV71 C1	GAPDH	12.021	12.069	0.067						VP1			#DIV/0!		#DIV/0!	#DIV/0!		#DIV/0!
93	H9	5.12EV71 C1	GAPDH	12.039	12.069	0.067						VP1			#DIV/0!		#DIV/0!	#DIV/0!		#DIV/0!
94	H10	5.12EV71 C1	VP1	23.829	23.934	0.224						GAPDH		#DIV/0!
95	H11	5.12EV71 C1	VP1	23.782	23.934	0.224						GAPDH
96	H12	5.12EV71 C1	VP1	24.192	23.934	0.224						GAPDH
Analysis Type = Singleplex
Endogenous Control = ACTIN
RQ Min/Max Confidence Level = 95.0
Reference Sample = EV71016160NM

## Sheet: 常用 2-ΔCт模版  1 V作对照
Well	Well Position	Sample Name	Target Name	CT	Ct Mean	Ct SD			Sample Name	Target Name	CT	mean	ΔCT		ΔΔCT	2-ΔΔCT	mean	SD
1	A1	5.12EV71 48-6	GAPDH	12.371	12.344	0.028			C1	HBV	20.844	20.8663	8.458		9.70567	0.00119758	0.00117936	2.53704e-05
2	A2	5.12EV71 48-6	GAPDH	12.315	12.344	0.028			C1	HBV	20.902		8.516		9.76367	0.00115039
3	A3	5.12EV71 48-6	GAPDH	12.346	12.344	0.028			C1	HBV	20.853		8.467		9.71467	0.00119013
4	A4	5.12EV71 48-6	VP1	11.184	11.208	0.096			C1	GAPDH	12.337	12.386
5	A5	5.12EV71 48-6	VP1	11.127	11.208	0.096			C1	GAPDH	12.395
6	A6	5.12EV71 48-6	VP1	11.314	11.208	0.096			C1	GAPDH	12.426
7	A7	5.12EV71 48D-160	GAPDH	12.73	12.726	0.058			V2	HBV	10.427	10.3	-1.12067	-1.24767	0.127	0.915734	1.01113	0.189558
8	A8	5.12EV71 48D-160	GAPDH	12.782	12.726	0.058			V2	HBV	10.002		-1.54567		-0.298	1.22944
9	A9	5.12EV71 48D-160	GAPDH	12.666	12.726	0.058			V2	HBV	10.471		-1.07667		0.171	0.888227
10	A10	5.12EV71 48D-160	VP1	11.603	12.118	0.838			V2	GAPDH	11.506	11.5477
11	A11	5.12EV71 48D-160	VP1	11.667	12.118	0.838			V2	GAPDH	11.48
12	A12	5.12EV71 48D-160	VP1	13.085	12.118	0.838			V2	GAPDH	11.657
13	B1	5.12EV71 48-32	GAPDH	12.162	12.14	0.02			20-019-1	HBV	11.406	11.3073	-0.918333		0.329333	0.795904	0.853283	0.0511734
14	B2	5.12EV71 48-32	GAPDH	12.124	12.14	0.02			20-019-1	HBV	11.278		-1.04633		0.201333	0.869746
15	B3	5.12EV71 48-32	GAPDH	12.133	12.14	0.02			20-019-1	HBV	11.238		-1.08633		0.161333	0.894198
16	B4	5.12EV71 48-32	VP1	11.233	11.242	0.041			20-019-1	GAPDH	12.362	12.3243
17	B5	5.12EV71 48-32	VP1	11.205	11.242	0.041			20-019-1	GAPDH	12.304
18	B6	5.12EV71 48-32	VP1	11.287	11.242	0.041			20-019-1	GAPDH	12.307
19	B7	5.12EV71 48D-800	GAPDH	12.931	12.865	0.068			20-019-2	HBV	10.614	10.5093	-1.31333		-0.0656667	1.04657	1.12689	0.0722181
20	B8	5.12EV71 48D-800	GAPDH	12.868	12.865	0.068			20-019-2	HBV	10.433		-1.49433		-0.246667	1.18646
21	B9	5.12EV71 48D-800	GAPDH	12.796	12.865	0.068			20-019-2	HBV	10.481		-1.44633		-0.198667	1.14764
22	B10	5.12EV71 48D-800	VP1	12.868	12.954	0.076			20-019-2	GAPDH	11.867	11.9273
23	B11	5.12EV71 48D-800	VP1	12.983	12.954	0.076			20-019-2	GAPDH	11.978
24	B12	5.12EV71 48D-800	VP1	13.01	12.954	0.076			20-019-2	GAPDH	11.937
25	C1	5.12EV71 48-160	GAPDH	12.489	12.459	0.052			20-019-3	HBV	11.33	11.245	-0.414		0.833667	0.561101	0.59581	0.0342222
26	C2	5.12EV71 48-160	GAPDH	12.49	12.459	0.052			20-019-3	HBV	11.241		-0.503		0.744667	0.596806
27	C3	5.12EV71 48-160	GAPDH	12.4	12.459	0.052			20-019-3	HBV	11.164		-0.58		0.667667	0.629524
28	C4	5.12EV71 48-160	VP1	12.238	12.336	0.098			20-019-3	GAPDH	11.708	11.744
29	C5	5.12EV71 48-160	VP1	12.434	12.336	0.098			20-019-3	GAPDH	11.795
30	C6	5.12EV71 48-160	VP1	12.335	12.336	0.098			20-019-3	GAPDH	11.729
31	C7	5.12EV71 48D-4	GAPDH	14.047	14.088	0.038			4-019-1	HBV	10.977	10.9867	-1.30967		-0.062	1.04391	1.03696	0.00683254
32	C8	5.12EV71 48D-4	GAPDH	14.097	14.088	0.038			4-019-1	HBV	10.996		-1.29067		-0.043	1.03025
33	C9	5.12EV71 48D-4	GAPDH	14.121	14.088	0.038			4-019-1	HBV	10.987		-1.29967		-0.052	1.0367
34	C10	5.12EV71 48D-4	VP1	16.7	16.707	0.047			4-019-1	GAPDH	12.335	12.2867
35	C11	5.12EV71 48D-4	VP1	16.663	16.707	0.047			4-019-1	GAPDH	12.252
36	C12	5.12EV71 48D-4	VP1	16.757	16.707	0.047			4-019-1	GAPDH	12.273
37	D1	5.12EV71 48-800	GAPDH	12.709	12.789	0.394			4-019-2	HBV	10.414	10.1873	-1.85267		-0.605	1.52098	1.79591	0.297118
38	D2	5.12EV71 48-800	GAPDH	13.218	12.789	0.394			4-019-2	HBV	10.207		-2.05967		-0.812	1.75564
39	D3	5.12EV71 48-800	GAPDH	12.441	12.789	0.394			4-019-2	HBV	9.941		-2.32567		-1.078	2.11111
40	D4	5.12EV71 48-800	VP1	14.78	14.879	0.104			4-019-2	GAPDH	12.251	12.2667
41	D5	5.12EV71 48-800	VP1	14.87	14.879	0.104			4-019-2	GAPDH	12.276
42	D6	5.12EV71 48-800	VP1	14.987	14.879	0.104			4-019-2	GAPDH	12.273
43	D7	5.12EV71 48D-20	GAPDH	14.363	14.334	0.056			4-019-3	HBV	11.773	11.359	-0.188		1.05967	0.479743	0.651815	0.149191
44	D8	5.12EV71 48D-20	GAPDH	14.27	14.334	0.056			4-019-3	HBV	11.166		-0.795		0.452667	0.730691
45	D9	5.12EV71 48D-20	GAPDH	14.37	14.334	0.056			4-019-3	HBV	11.138		-0.823		0.424667	0.745011
46	D10	5.12EV71 48D-20	VP1	20.379	20.448	0.086			4-019-3	GAPDH	11.913	11.961
47	D11	5.12EV71 48D-20	VP1	20.422	20.448	0.086			4-019-3	GAPDH	11.936
48	D12	5.12EV71 48D-20	VP1	20.544	20.448	0.086			4-019-3	GAPDH	12.034
49	E1	5.12EV71 48-4	GAPDH	13.829	13.792	0.04			0.8-019-1	HBV	10.366	10.4777	-3.18867		-1.941	3.83972	3.55924	0.245322
50	E2	5.12EV71 48-4	GAPDH	13.797	13.792	0.04			0.8-019-1	HBV	10.548		-3.00667		-1.759	3.38463
51	E3	5.12EV71 48-4	GAPDH	13.75	13.792	0.04			0.8-019-1	HBV	10.519		-3.03567		-1.788	3.45336
52	E4	5.12EV71 48-4	VP1	15.467	15.395	0.063			0.8-019-1	GAPDH	13.576	13.5547
53	E5	5.12EV71 48-4	VP1	15.352	15.395	0.063			0.8-019-1	GAPDH	13.533
54	E6	5.12EV71 48-4	VP1	15.366	15.395	0.063			0.8-019-1	GAPDH	13.555
55	E7	5.12EV71 V1	GAPDH	12.866	12.811	0.056			0.8-019-2	HBV	11.202	11.1453	-0.905667		0.342	0.788947	0.82088	0.0282566
56	E8	5.12EV71 V1	GAPDH	12.754	12.811	0.056			0.8-019-2	HBV	11.127		-0.980667		0.267	0.831046
57	E9	5.12EV71 V1	GAPDH	12.812	12.811	0.056			0.8-019-2	HBV	11.107		-1.00067		0.247	0.842647
58	E10	5.12EV71 V1	VP1	11.112	11.163	0.049			0.8-019-2	GAPDH	12.075	12.1077
59	E11	5.12EV71 V1	VP1	11.169	11.163	0.049			0.8-019-2	GAPDH	12.051
60	E12	5.12EV71 V1	VP1	11.209	11.163	0.049			0.8-019-2	GAPDH	12.197
61	F1	5.12EV71 48-20	GAPDH	14.79	14.796	0.011			0.8-019-3	HBV	10.95	10.95	-0.916333		0.331333	0.794802	0.794995	0.0214889
62	F2	5.12EV71 48-20	GAPDH	14.809	14.796	0.011			0.8-019-3	HBV	10.911		-0.955333		0.292333	0.81658
63	F3	5.12EV71 48-20	GAPDH	14.789	14.796	0.011			0.8-019-3	HBV	10.989		-0.877333		0.370333	0.773604
64	F4	5.12EV71 48-20	VP1	21.767	21.811	0.078			0.8-019-3	GAPDH	11.948	11.8663
65	F5	5.12EV71 48-20	VP1	21.766	21.811	0.078			0.8-019-3	GAPDH	11.832
66	F6	5.12EV71 48-20	VP1	21.901	21.811	0.078			0.8-019-3	GAPDH	11.819
67	F7	5.12EV71 V2	GAPDH	12.982	12.984	0.005						#DIV/0!	#DIV/0!		#DIV/0!	#DIV/0!	#DIV/0!	#DIV/0!
68	F8	5.12EV71 V2	GAPDH	12.99	12.984	0.005							#DIV/0!		#DIV/0!	#DIV/0!
69	F9	5.12EV71 V2	GAPDH	12.98	12.984	0.005							#DIV/0!		#DIV/0!	#DIV/0!
70	F10	5.12EV71 V2	VP1	11.159	11.232	0.071						#DIV/0!
71	F11	5.12EV71 V2	VP1	11.237	11.232	0.071
72	F12	5.12EV71 V2	VP1	11.301	11.232	0.071
73	G1	5.12EV71 48D-6	GAPDH	12.855	12.849	0.034						#DIV/0!	#DIV/0!		#DIV/0!	#DIV/0!	#DIV/0!	#DIV/0!
74	G2	5.12EV71 48D-6	GAPDH	12.879	12.849	0.034							#DIV/0!		#DIV/0!	#DIV/0!
75	G3	5.12EV71 48D-6	GAPDH	12.812	12.849	0.034							#DIV/0!		#DIV/0!	#DIV/0!
76	G4	5.12EV71 48D-6	VP1	11.971	12.01	0.041						#DIV/0!
77	G5	5.12EV71 48D-6	VP1	12.053	12.01	0.041
78	G6	5.12EV71 48D-6	VP1	12.005	12.01	0.041
79	G7	5.12EV71 V3	GAPDH	12.39	12.436	0.048						#DIV/0!	#DIV/0!		#DIV/0!	#DIV/0!	#DIV/0!	#DIV/0!
80	G8	5.12EV71 V3	GAPDH	12.486	12.436	0.048							#DIV/0!		#DIV/0!	#DIV/0!
81	G9	5.12EV71 V3	GAPDH	12.432	12.436	0.048							#DIV/0!		#DIV/0!	#DIV/0!
82	G10	5.12EV71 V3	VP1	11.01	11.057	0.105						#DIV/0!
83	G11	5.12EV71 V3	VP1	10.984	11.057	0.105
84	G12	5.12EV71 V3	VP1	11.177	11.057	0.105
85	H1	5.12EV71 48D-32	GAPDH	12.542	12.512	0.029						#DIV/0!	#DIV/0!		#DIV/0!	#DIV/0!	#DIV/0!	#DIV/0!
86	H2	5.12EV71 48D-32	GAPDH	12.483	12.512	0.029							#DIV/0!		#DIV/0!	#DIV/0!
87	H3	5.12EV71 48D-32	GAPDH	12.51	12.512	0.029							#DIV/0!		#DIV/0!	#DIV/0!
88	H4	5.12EV71 48D-32	VP1	12.04	12.053	0.033						#DIV/0!
89	H5	5.12EV71 48D-32	VP1	12.029	12.053	0.033
90	H6	5.12EV71 48D-32	VP1	12.091	12.053	0.033
91	H7	5.12EV71 C1	GAPDH	12.146	12.069	0.067						#DIV/0!	#DIV/0!		#DIV/0!	#DIV/0!	#DIV/0!	#DIV/0!
92	H8	5.12EV71 C1	GAPDH	12.021	12.069	0.067							#DIV/0!		#DIV/0!	#DIV/0!
93	H9	5.12EV71 C1	GAPDH	12.039	12.069	0.067							#DIV/0!		#DIV/0!	#DIV/0!
94	H10	5.12EV71 C1	VP1	23.829	23.934	0.224						#DIV/0!
95	H11	5.12EV71 C1	VP1	23.782	23.934	0.224
96	H12	5.12EV71 C1	VP1	24.192	23.934	0.224
Analysis Type = Singleplex
Endogenous Control = ACTIN
RQ Min/Max Confidence Level = 95.0
Reference Sample = EV71016160NM

## Sheet: Sheet1
Sample Name	Target Name	CT
20-019-1	HBV	11.406			C1	HBV	20.844	C2	HBV	24.584
20-019-1	HBV	11.278			C1	HBV	20.902	C2	HBV	24.599
20-019-1	HBV	11.238			C1	HBV	20.853	C2	HBV	24.492
20-019-1	GAPDH	12.362			C1	GAPDH	12.337	C2	GAPDH	12.431
20-019-1	GAPDH	12.304			C1	GAPDH	12.395	C2	GAPDH	12.324
20-019-1	GAPDH	12.307			C1	GAPDH	12.426	C2	GAPDH	12.484
0.8-019-3	HBV	10.95			V1	HBV	10.946	V2	HBV	10.427	V3	HBV	11.902
0.8-019-3	HBV	10.911			V1	HBV	10.883	V2	HBV	10.002	V3	HBV	11.877
0.8-019-3	HBV	10.989			V1	HBV	10.893	V2	HBV	10.471	V3	HBV	11.876
0.8-019-3	GAPDH	11.948			V1	GAPDH	11.756	V2	GAPDH	11.506	V3	GAPDH	12.507
0.8-019-3	GAPDH	11.832			V1	GAPDH	11.763	V2	GAPDH	11.48	V3	GAPDH	12.424
0.8-019-3	GAPDH	11.819			V1	GAPDH	11.935	V2	GAPDH	11.657	V3	GAPDH	12.536
4-019-1	HBV	10.977			20-019-1	HBV	11.406
4-019-1	HBV	10.996			20-019-1	HBV	11.278
4-019-1	HBV	10.987			20-019-1	HBV	11.238				C	0	0.8	4	20
4-019-1	GAPDH	12.335			20-019-1	GAPDH	12.362				0.00119758	0.915734	0.788947	0.479743	0.561101
4-019-1	GAPDH	12.252			20-019-1	GAPDH	12.304				0.00115039	1.22944	0.831046	0.730691	0.596806
4-019-1	GAPDH	12.273			20-019-1	GAPDH	12.307				0.00119013	0.888227	0.842647	0.745011	0.629524
V1	HBV	10.946			20-019-2	HBV	10.614					0.0842663	0.211053		0.438899
V1	HBV	10.883			20-019-2	HBV	10.433					-0.229439	0.168954	0.269309	0.403194
V1	HBV	10.893			20-019-2	HBV	10.481					0.111773	0.157353	0.254989	0.370476
V1	GAPDH	11.756			20-019-2	GAPDH	11.867
V1	GAPDH	11.763			20-019-2	GAPDH	11.978					-0.0111331	0.189558	0.17912	0.0282566	0.262149	0.0101257	0.40419	0.0342222
V1	GAPDH	11.935			20-019-2	GAPDH	11.937					0	18.9558	17.912	2.82566	26.2149	1.01257	40.419	3.42222
0.8-019-1	HBV	10.366			20-019-3	HBV	11.33
0.8-019-1	HBV	10.548			20-019-3	HBV	11.241
0.8-019-1	HBV	10.519			20-019-3	HBV	11.164
0.8-019-1	GAPDH	13.576			20-019-3	GAPDH	11.708
0.8-019-1	GAPDH	13.533			20-019-3	GAPDH	11.795
0.8-019-1	GAPDH	13.555			20-019-3	GAPDH	11.729
V2	HBV	10.427			4-019-1	HBV	10.977				C
V2	HBV	10.002			4-019-1	HBV	10.996				0
V2	HBV	10.471			4-019-1	HBV	10.987				0.8
V2	GAPDH	11.506			4-019-1	GAPDH	12.335				4
V2	GAPDH	11.48			4-019-1	GAPDH	12.252				20
V2	GAPDH	11.657			4-019-1	GAPDH	12.273
20-019-2	HBV	10.614			4-019-2	HBV	10.414
20-019-2	HBV	10.433			4-019-2	HBV	10.207
20-019-2	HBV	10.481			4-019-2	HBV	9.941
20-019-2	GAPDH	11.867			4-019-2	GAPDH	12.251
20-019-2	GAPDH	11.978			4-019-2	GAPDH	12.276
20-019-2	GAPDH	11.937			4-019-2	GAPDH	12.273
V3	HBV	11.902			4-019-3	HBV	11.773
V3	HBV	11.877			4-019-3	HBV	11.166
V3	HBV	11.876			4-019-3	HBV	11.138
V3	GAPDH	12.507			4-019-3	GAPDH	11.913
V3	GAPDH	12.424			4-019-3	GAPDH	11.936
V3	GAPDH	12.536			4-019-3	GAPDH	12.034
4-019-2	HBV	10.414			0.8-019-1	HBV	10.366
4-019-2	HBV	10.207			0.8-019-1	HBV	10.548
4-019-2	HBV	9.941			0.8-019-1	HBV	10.519
4-019-2	GAPDH	12.251			0.8-019-1	GAPDH	13.576
4-019-2	GAPDH	12.276			0.8-019-1	GAPDH	13.533
4-019-2	GAPDH	12.273			0.8-019-1	GAPDH	13.555
C1	HBV	20.844			0.8-019-2	HBV	11.202
C1	HBV	20.902			0.8-019-2	HBV	11.127
C1	HBV	20.853			0.8-019-2	HBV	11.107
C1	GAPDH	12.337			0.8-019-2	GAPDH	12.075
C1	GAPDH	12.395			0.8-019-2	GAPDH	12.051
C1	GAPDH	12.426			0.8-019-2	GAPDH	12.197
0.8-019-2	HBV	11.202			0.8-019-3	HBV	10.95
0.8-019-2	HBV	11.127			0.8-019-3	HBV	10.911
0.8-019-2	HBV	11.107			0.8-019-3	HBV	10.989
0.8-019-2	GAPDH	12.075			0.8-019-3	GAPDH	11.948
0.8-019-2	GAPDH	12.051			0.8-019-3	GAPDH	11.832
0.8-019-2	GAPDH	12.197			0.8-019-3	GAPDH	11.819
C2	HBV	24.584
C2	HBV	24.599
C2	HBV	24.492
C2	GAPDH	12.431
C2	GAPDH	12.324
C2	GAPDH	12.484
20-019-3	HBV	11.33
20-019-3	HBV	11.241
20-019-3	HBV	11.164
20-019-3	GAPDH	11.708
20-019-3	GAPDH	11.795
20-019-3	GAPDH	11.729
4-019-3	HBV	11.773
4-019-3	HBV	11.166
4-019-3	HBV	11.138
4-019-3	GAPDH	11.913
4-019-3	GAPDH	11.936
4-019-3	GAPDH	12.034

## Sheet: 2-ΔCт模版  2 C做对照
Well	Well Position	Sample Name	Target Name	CT	Ct Mean	Ct SD					Sample Name	Target Name	CT	Ct Mean	ΔCт	mean	ΔΔCT	2-ΔΔCт	mean	相对量计算	mean	SD
1	A1	5.23EV71 C1	GAPDH	10.41	9.111	1.167					5.23EV71 C1	GAPDH	10.41	9.111
2	A2	5.23EV71 C1	GAPDH	8.773	9.111	1.167					5.23EV71 C1	GAPDH	8.773
3	A3	5.23EV71 C1	GAPDH	8.15	9.111	1.167					5.23EV71 C1	GAPDH	8.15
4	A4	5.23EV71 C1	VP1	22.708	22.725	0.015					5.23EV71 C1	VP1	22.708	22.725	13.597	13.614	-0.017	1.01185		1.26234e-05	1.2476e-05	1.28334e-07
5	A5	5.23EV71 C1	VP1	22.735	22.725	0.015					5.23EV71 C1	VP1	22.735		13.624		0.01	0.993092		1.23894e-05
6	A6	5.23EV71 C1	VP1	22.732	22.725	0.015					5.23EV71 C1	VP1	22.732		13.621		0.007	0.99516		1.24152e-05
7	A7	5.23EV71 V1	GAPDH	11.565	11.412	0.17					5.23EV71 V1	GAPDH	11.565	11.4113
8	A8	5.23EV71 V1	GAPDH	11.44	11.412	0.17					5.23EV71 V1	GAPDH	11.44
9	A9	5.23EV71 V1	GAPDH	11.229	11.412	0.17					5.23EV71 V1	GAPDH	11.229
10	A10	5.23EV71 V1	VP1	8.766	8.735	0.03					5.23EV71 V1	VP1	8.766	8.735	-2.64533		-16.2593	78441.7	80156.7	0.978604	1	0.0204942
11	A11	5.23EV71 V1	VP1	8.732	8.735	0.03					5.23EV71 V1	VP1	8.732		-2.67933		-16.2933	80312.3		1.00194
12	A12	5.23EV71 V1	VP1	8.707	8.735	0.03					5.23EV71 V1	VP1	8.707		-2.70433		-16.3183	81716.1		1.01945
13	B1	5.23EV71 46-20	GAPDH	11.557	11.457	0.097					5.23EV71 46-6	GAPDH	11.857	11.862
14	B2	5.23EV71 46-20	GAPDH	11.363	11.457	0.097					5.23EV71 46-6	GAPDH	11.844
15	B3	5.23EV71 46-20	GAPDH	11.451	11.457	0.097					5.23EV71 46-6	GAPDH	11.885
16	B4	5.23EV71 46-20	VP1	13.52	13.543	0.086					5.23EV71 46-6	VP1	9.224	9.23267	-2.638		-16.252	78044		0.973643	0.96782	0.00504258
17	B5	5.23EV71 46-20	VP1	13.637	13.543	0.086					5.23EV71 46-6	VP1	9.237		-2.625		-16.239	77343.9		0.964909
18	B6	5.23EV71 46-20	VP1	13.471	13.543	0.086					5.23EV71 46-6	VP1	9.237		-2.625		-16.239	77343.9		0.964909
19	B7	5.23EV71 46-4	GAPDH	11.254	11.117	0.12					5.23EV71 46-32	GAPDH	11.343	11.3093
20	B8	5.23EV71 46-4	GAPDH	11.063	11.117	0.12					5.23EV71 46-32	GAPDH	11.352
21	B9	5.23EV71 46-4	GAPDH	11.033	11.117	0.12					5.23EV71 46-32	GAPDH	11.233
22	B10	5.23EV71 46-4	VP1	13.202	13.142	0.064					5.23EV71 46-32	VP1	9.246	9.232	-2.06333		-15.6773	52402		0.653744	0.660147	0.0075054
23	B11	5.23EV71 46-4	VP1	13.075	13.142	0.064					5.23EV71 46-32	VP1	9.236		-2.07333		-15.6873	52766.5		0.658291
24	B12	5.23EV71 46-4	VP1	13.15	13.142	0.064					5.23EV71 46-32	VP1	9.214		-2.09533		-15.7093	53577.3		0.668406
25	C1	5.23EV71 46-800	GAPDH	10.924	10.914	0.086					5.23EV71 46-160	GAPDH	11.108	11.0677
26	C2	5.23EV71 46-800	GAPDH	10.994	10.914	0.086					5.23EV71 46-160	GAPDH	11.107
27	C3	5.23EV71 46-800	GAPDH	10.823	10.914	0.086					5.23EV71 46-160	GAPDH	10.988
28	C4	5.23EV71 46-800	VP1	13.281	13.226	0.095					5.23EV71 46-160	VP1	11.622	11.628	0.554333		-13.0597	8537.91		0.106515	0.106088	0.00215986
29	C5	5.23EV71 46-800	VP1	13.279	13.226	0.095					5.23EV71 46-160	VP1	11.66		0.592333		-13.0217	8315.96		0.103746
30	C6	5.23EV71 46-800	VP1	13.116	13.226	0.095					5.23EV71 46-160	VP1	11.602		0.534333		-13.0797	8657.09		0.108002
31	C7	5.23EV71 46-160	GAPDH	11.108	11.067	0.069					5.23EV71 46-800	GAPDH	10.924	10.9137
32	C8	5.23EV71 46-160	GAPDH	11.107	11.067	0.069					5.23EV71 46-800	GAPDH	10.994
33	C9	5.23EV71 46-160	GAPDH	10.988	11.067	0.069					5.23EV71 46-800	GAPDH	10.823
34	C10	5.23EV71 46-160	VP1	11.622	11.628	0.03					5.23EV71 46-800	VP1	13.281	13.2253	2.36733		-11.2467	2429.88		0.0303141	0.0315524	0.00210859
35	C11	5.23EV71 46-160	VP1	11.66	11.628	0.03					5.23EV71 46-800	VP1	13.279		2.36533		-11.2487	2433.25		0.0303561
36	C12	5.23EV71 46-160	VP1	11.602	11.628	0.03					5.23EV71 46-800	VP1	13.116		2.20233		-11.4117	2724.29		0.0339871
37	D1	5.23EV71 46-32	GAPDH	11.343	11.309	0.066					5.23EV71 46-4	GAPDH	11.254	11.1167
38	D2	5.23EV71 46-32	GAPDH	11.352	11.309	0.066					5.23EV71 46-4	GAPDH	11.063
39	D3	5.23EV71 46-32	GAPDH	11.233	11.309	0.066					5.23EV71 46-4	GAPDH	11.033
40	D4	5.23EV71 46-32	VP1	9.246	9.232	0.016					5.23EV71 46-4	VP1	13.202	13.1423	2.08533		-11.5287	2954.44		0.0368582	0.0384397	0.00170739
41	D5	5.23EV71 46-32	VP1	9.236	9.232	0.016					5.23EV71 46-4	VP1	13.075		1.95833		-11.6557	3226.3		0.04025
42	D6	5.23EV71 46-32	VP1	9.214	9.232	0.016					5.23EV71 46-4	VP1	13.15		2.03333		-11.5807	3062.87		0.038211
43	D7	5.23EV71 46-6	GAPDH	11.857	11.862	0.021					5.23EV71 46-20	GAPDH	11.557	11.457
44	D8	5.23EV71 46-6	GAPDH	11.844	11.862	0.021					5.23EV71 46-20	GAPDH	11.363
45	D9	5.23EV71 46-6	GAPDH	11.885	11.862	0.021					5.23EV71 46-20	GAPDH	11.451
46	D10	5.23EV71 46-6	VP1	9.224	9.233	0.007					5.23EV71 46-20	VP1	13.52	13.5427	2.063		-11.551	3000.53		0.0374333	0.0368924	0.00215608
47	D11	5.23EV71 46-6	VP1	9.237	9.233	0.007					5.23EV71 46-20	VP1	13.637		2.18		-11.434	2766.79		0.0345173
48	D12	5.23EV71 46-6	VP1	9.237	9.233	0.007					5.23EV71 46-20	VP1	13.471		2.014		-11.6	3104.19		0.0387265
49	E1											GAPDH		#DIV/0!
50	E2											GAPDH
51	E3											GAPDH
52	E4											VP1		#DIV/0!	#DIV/0!		#DIV/0!	#DIV/0!		#DIV/0!	#DIV/0!	#DIV/0!
53	E5											VP1			#DIV/0!		#DIV/0!	#DIV/0!		#DIV/0!
54	E6											VP1			#DIV/0!		#DIV/0!	#DIV/0!		#DIV/0!
55	E7											GAPDH		#DIV/0!
56	E8											GAPDH
57	E9											GAPDH
58	E10											VP1		#DIV/0!	#DIV/0!		#DIV/0!	#DIV/0!		#DIV/0!	#DIV/0!	#DIV/0!
59	E11											VP1			#DIV/0!		#DIV/0!	#DIV/0!		#DIV/0!
60	E12											VP1			#DIV/0!		#DIV/0!	#DIV/0!		#DIV/0!
61	F1											GAPDH		#DIV/0!
62	F2											GAPDH
63	F3											GAPDH
64	F4											VP1		#DIV/0!	#DIV/0!		#DIV/0!	#DIV/0!		#DIV/0!	#DIV/0!	#DIV/0!
65	F5											VP1			#DIV/0!		#DIV/0!	#DIV/0!		#DIV/0!
66	F6											VP1			#DIV/0!		#DIV/0!	#DIV/0!		#DIV/0!
67	F7											GAPDH		#DIV/0!
68	F8											GAPDH
69	F9											GAPDH
70	F10											VP1		#DIV/0!	#DIV/0!		#DIV/0!	#DIV/0!		#DIV/0!	#DIV/0!	#DIV/0!
71	F11											VP1			#DIV/0!		#DIV/0!	#DIV/0!		#DIV/0!
72	F12											VP1			#DIV/0!		#DIV/0!	#DIV/0!		#DIV/0!
73	G1											GAPDH		#DIV/0!
74	G2											GAPDH
75	G3											GAPDH
76	G4											VP1		#DIV/0!	#DIV/0!		#DIV/0!	#DIV/0!		#DIV/0!	#DIV/0!	#DIV/0!
77	G5											VP1			#DIV/0!		#DIV/0!	#DIV/0!		#DIV/0!
78	G6											VP1			#DIV/0!		#DIV/0!	#DIV/0!		#DIV/0!
79	G7											GAPDH		#DIV/0!
80	G8											GAPDH
81	G9											GAPDH
82	G10											VP1		#DIV/0!	#DIV/0!		#DIV/0!	#DIV/0!		#DIV/0!	#DIV/0!	#DIV/0!
83	G11											VP1			#DIV/0!		#DIV/0!	#DIV/0!		#DIV/0!
84	G12											VP1			#DIV/0!		#DIV/0!	#DIV/0!		#DIV/0!
85	H1											GAPDH		#DIV/0!
86	H2											GAPDH
87	H3											GAPDH
88	H4											VP1		#DIV/0!	#DIV/0!		#DIV/0!	#DIV/0!		#DIV/0!	#DIV/0!	#DIV/0!
89	H5											VP1			#DIV/0!		#DIV/0!	#DIV/0!		#DIV/0!
90	H6											VP1			#DIV/0!		#DIV/0!	#DIV/0!		#DIV/0!
91	H7											GAPDH		#DIV/0!
92	H8											GAPDH
93	H9											GAPDH
94	H10											VP1		#DIV/0!	#DIV/0!		#DIV/0!	#DIV/0!		#DIV/0!	#DIV/0!	#DIV/0!
95	H11											VP1			#DIV/0!		#DIV/0!	#DIV/0!		#DIV/0!
96	H12											VP1			#DIV/0!		#DIV/0!	#DIV/0!		#DIV/0!
Analysis Type = Singleplex
Endogenous Control = ACTIN
RQ Min/Max Confidence Level = 95.0
Reference Sample = EV71016160NM

## Sheet: 常用 2-ΔCт模版  2 V作对照
Well	Well Position	Sample Name	Target Name	CT	Ct Mean	Ct SD			Sample Name	Target Name	CT	mean	ΔCT		ΔΔCT	2-ΔΔCT	mean	SD
1	A1	5.23EV71 C1	GAPDH	10.41	9.111	1.167			5.23EV71 C1	GAPDH	10.41	9.111
2	A2	5.23EV71 C1	GAPDH	8.773	9.111	1.167			5.23EV71 C1	GAPDH	8.773
3	A3	5.23EV71 C1	GAPDH	8.15	9.111	1.167			5.23EV71 C1	GAPDH	8.15
4	A4	5.23EV71 C1	VP1	22.708	22.725	0.015			5.23EV71 C1	VP1	22.708	22.725	13.597		16.2733	1.26252e-05	1.24778e-05	1.28352e-07
5	A5	5.23EV71 C1	VP1	22.735	22.725	0.015			5.23EV71 C1	VP1	22.735		13.624		16.3003	1.23911e-05
6	A6	5.23EV71 C1	VP1	22.732	22.725	0.015			5.23EV71 C1	VP1	22.732		13.621		16.2973	1.24169e-05
7	A7	5.23EV71 V1	GAPDH	11.565	11.412	0.17			5.23EV71 V1	GAPDH	11.565	11.4113
8	A8	5.23EV71 V1	GAPDH	11.44	11.412	0.17			5.23EV71 V1	GAPDH	11.44
9	A9	5.23EV71 V1	GAPDH	11.229	11.412	0.17			5.23EV71 V1	GAPDH	11.229
10	A10	5.23EV71 V1	VP1	8.766	8.735	0.03			5.23EV71 V1	VP1	8.766	8.735	-2.64533	-2.67633	0.031	0.978742	1.00014	0.0204971
11	A11	5.23EV71 V1	VP1	8.732	8.735	0.03			5.23EV71 V1	VP1	8.732		-2.67933		-0.003	1.00208
12	A12	5.23EV71 V1	VP1	8.707	8.735	0.03			5.23EV71 V1	VP1	8.707		-2.70433		-0.028	1.0196
13	B1	5.23EV71 46-20	GAPDH	11.557	11.457	0.097			5.23EV71 46-6	GAPDH	11.857	11.862
14	B2	5.23EV71 46-20	GAPDH	11.363	11.457	0.097			5.23EV71 46-6	GAPDH	11.844
15	B3	5.23EV71 46-20	GAPDH	11.451	11.457	0.097			5.23EV71 46-6	GAPDH	11.885
16	B4	5.23EV71 46-20	VP1	13.52	13.543	0.086			5.23EV71 46-6	VP1	9.224	9.23267	-2.638		0.0383333	0.973779	0.967956	0.00504328
17	B5	5.23EV71 46-20	VP1	13.637	13.543	0.086			5.23EV71 46-6	VP1	9.237		-2.625		0.0513333	0.965044
18	B6	5.23EV71 46-20	VP1	13.471	13.543	0.086			5.23EV71 46-6	VP1	9.237		-2.625		0.0513333	0.965044
19	B7	5.23EV71 46-4	GAPDH	11.254	11.117	0.12			5.23EV71 46-32	GAPDH	11.343	11.3093
20	B8	5.23EV71 46-4	GAPDH	11.063	11.117	0.12			5.23EV71 46-32	GAPDH	11.352
21	B9	5.23EV71 46-4	GAPDH	11.033	11.117	0.12			5.23EV71 46-32	GAPDH	11.233
22	B10	5.23EV71 46-4	VP1	13.202	13.142	0.064			5.23EV71 46-32	VP1	9.246	9.232	-2.06333		0.613	0.653836	0.66024	0.00750646
23	B11	5.23EV71 46-4	VP1	13.075	13.142	0.064			5.23EV71 46-32	VP1	9.236		-2.07333		0.603	0.658383
24	B12	5.23EV71 46-4	VP1	13.15	13.142	0.064			5.23EV71 46-32	VP1	9.214		-2.09533		0.581	0.6685
25	C1	5.23EV71 46-800	GAPDH	10.924	10.914	0.086			5.23EV71 46-160	GAPDH	11.108	11.0677
26	C2	5.23EV71 46-800	GAPDH	10.994	10.914	0.086			5.23EV71 46-160	GAPDH	11.107
27	C3	5.23EV71 46-800	GAPDH	10.823	10.914	0.086			5.23EV71 46-160	GAPDH	10.988
28	C4	5.23EV71 46-800	VP1	13.281	13.226	0.095			5.23EV71 46-160	VP1	11.622	11.628	0.554333		3.23067	0.10653	0.106103	0.00216017
29	C5	5.23EV71 46-800	VP1	13.279	13.226	0.095			5.23EV71 46-160	VP1	11.66		0.592333		3.26867	0.103761
30	C6	5.23EV71 46-800	VP1	13.116	13.226	0.095			5.23EV71 46-160	VP1	11.602		0.534333		3.21067	0.108017
31	C7	5.23EV71 46-160	GAPDH	11.108	11.067	0.069			5.23EV71 46-800	GAPDH	10.924	10.9137
32	C8	5.23EV71 46-160	GAPDH	11.107	11.067	0.069			5.23EV71 46-800	GAPDH	10.994
33	C9	5.23EV71 46-160	GAPDH	10.988	11.067	0.069			5.23EV71 46-800	GAPDH	10.823
34	C10	5.23EV71 46-160	VP1	11.622	11.628	0.03			5.23EV71 46-800	VP1	13.281	13.2253	2.36733		5.04367	0.0303183	0.0315569	0.00210889
35	C11	5.23EV71 46-160	VP1	11.66	11.628	0.03			5.23EV71 46-800	VP1	13.279		2.36533		5.04167	0.0303604
36	C12	5.23EV71 46-160	VP1	11.602	11.628	0.03			5.23EV71 46-800	VP1	13.116		2.20233		4.87867	0.0339919
37	D1	5.23EV71 46-32	GAPDH	11.343	11.309	0.066			5.23EV71 46-4	GAPDH	11.254	11.1167
38	D2	5.23EV71 46-32	GAPDH	11.352	11.309	0.066			5.23EV71 46-4	GAPDH	11.063
39	D3	5.23EV71 46-32	GAPDH	11.233	11.309	0.066			5.23EV71 46-4	GAPDH	11.033
40	D4	5.23EV71 46-32	VP1	9.246	9.232	0.016			5.23EV71 46-4	VP1	13.202	13.1423	2.08533		4.76167	0.0368634	0.0384451	0.00170763
41	D5	5.23EV71 46-32	VP1	9.236	9.232	0.016			5.23EV71 46-4	VP1	13.075		1.95833		4.63467	0.0402556
42	D6	5.23EV71 46-32	VP1	9.214	9.232	0.016			5.23EV71 46-4	VP1	13.15		2.03333		4.70967	0.0382163
43	D7	5.23EV71 46-6	GAPDH	11.857	11.862	0.021			5.23EV71 46-20	GAPDH	11.557	11.457
44	D8	5.23EV71 46-6	GAPDH	11.844	11.862	0.021			5.23EV71 46-20	GAPDH	11.363
45	D9	5.23EV71 46-6	GAPDH	11.885	11.862	0.021			5.23EV71 46-20	GAPDH	11.451
46	D10	5.23EV71 46-6	VP1	9.224	9.233	0.007			5.23EV71 46-20	VP1	13.52	13.5427	2.063		4.73933	0.0374385	0.0368975	0.00215639
47	D11	5.23EV71 46-6	VP1	9.237	9.233	0.007			5.23EV71 46-20	VP1	13.637		2.18		4.85633	0.0345222
48	D12	5.23EV71 46-6	VP1	9.237	9.233	0.007			5.23EV71 46-20	VP1	13.471		2.014		4.69033	0.0387319
										GAPDH		#DIV/0!
										GAPDH
										GAPDH
										VP1		#DIV/0!	#DIV/0!		#DIV/0!	#DIV/0!	#DIV/0!	#DIV/0!
										VP1			#DIV/0!		#DIV/0!	#DIV/0!
										VP1			#DIV/0!		#DIV/0!	#DIV/0!
										GAPDH		#DIV/0!
										GAPDH
										GAPDH
										VP1		#DIV/0!	#DIV/0!		#DIV/0!	#DIV/0!	#DIV/0!	#DIV/0!
										VP1			#DIV/0!		#DIV/0!	#DIV/0!
										VP1			#DIV/0!		#DIV/0!	#DIV/0!
										GAPDH		#DIV/0!
										GAPDH
										GAPDH
										VP1		#DIV/0!	#DIV/0!		#DIV/0!	#DIV/0!	#DIV/0!	#DIV/0!
										VP1			#DIV/0!		#DIV/0!	#DIV/0!
										VP1			#DIV/0!		#DIV/0!	#DIV/0!
										GAPDH		#DIV/0!
										GAPDH
										GAPDH
										VP1		#DIV/0!	#DIV/0!		#DIV/0!	#DIV/0!	#DIV/0!	#DIV/0!
										VP1			#DIV/0!		#DIV/0!	#DIV/0!
										VP1			#DIV/0!		#DIV/0!	#DIV/0!
										GAPDH		#DIV/0!
										GAPDH
										GAPDH
										VP1		#DIV/0!	#DIV/0!		#DIV/0!	#DIV/0!	#DIV/0!	#DIV/0!
										VP1			#DIV/0!		#DIV/0!	#DIV/0!
										VP1			#DIV/0!		#DIV/0!	#DIV/0!
										GAPDH		#DIV/0!
										GAPDH
										GAPDH
										VP1		#DIV/0!	#DIV/0!		#DIV/0!	#DIV/0!	#DIV/0!	#DIV/0!
										VP1			#DIV/0!		#DIV/0!	#DIV/0!
										VP1			#DIV/0!		#DIV/0!	#DIV/0!
										GAPDH		#DIV/0!
										GAPDH
										GAPDH
										VP1		#DIV/0!	#DIV/0!		#DIV/0!	#DIV/0!	#DIV/0!	#DIV/0!
										VP1			#DIV/0!		#DIV/0!	#DIV/0!
										VP1			#DIV/0!		#DIV/0!	#DIV/0!
										GAPDH		#DIV/0!
										GAPDH
										GAPDH
										VP1		#DIV/0!	#DIV/0!		#DIV/0!	#DIV/0!	#DIV/0!	#DIV/0!
										VP1			#DIV/0!		#DIV/0!	#DIV/0!
										VP1			#DIV/0!		#DIV/0!	#DIV/0!
