# Supplementary material
Source: Research Square preprint supplement (doi:10.21203/rs.3.rs-8928353/v1)
Supplement: Supplementary file 6 [file bf6b43d0d104b30e44b4e465.xlsx]

## Sheet: 2-ΔCт模版  1 C作对照
Well	Well Position	Sample Name	Target Name	CT	Ct Mean	Ct SD					Sample Name	Target Name	CT	mean	ΔCт	mean	ΔΔCт	2-ΔΔCт	mean	相对量计算	mean	SD
1	A1	5.12EV71 48-6	GAPDH	12.371	12.344	0.028					5.12EV71 C1	VP1	23.829	23.9343	11.7603	11.8657	-0.105333	1.07574		0.00011064	0.000103658	1.53771e-05
2	A2	5.12EV71 48-6	GAPDH	12.315	12.344	0.028					5.12EV71 C1	VP1	23.782		11.7133		-0.152333	1.11137		0.000114304
3	A3	5.12EV71 48-6	GAPDH	12.346	12.344	0.028					5.12EV71 C1	VP1	24.192		12.1233		0.257667	0.83644		8.6028e-05
4	A4	5.12EV71 48-6	VP1	11.184	11.208	0.096					5.12EV71 C1	GAPDH	12.146	12.0687
5	A5	5.12EV71 48-6	VP1	11.127	11.208	0.096					5.12EV71 C1	GAPDH	12.021
6	A6	5.12EV71 48-6	VP1	11.314	11.208	0.096					5.12EV71 C1	GAPDH	12.039
7	A7	5.12EV71 48D-160	GAPDH	12.73	12.726	0.058					5.12EV71 V3	VP1	11.01	11.057	-1.426		-13.2917	10027.4	9722.87	1.03133	1	0.0711204
8	A8	5.12EV71 48D-160	GAPDH	12.782	12.726	0.058					5.12EV71 V3	VP1	10.984		-1.452		-13.3177	10209.8		1.05008
9	A9	5.12EV71 48D-160	GAPDH	12.666	12.726	0.058					5.12EV71 V3	VP1	11.177		-1.259		-13.1247	8931.38		0.918594
10	A10	5.12EV71 48D-160	VP1	11.603	12.118	0.838					5.12EV71 V3	GAPDH	12.39	12.436						0
11	A11	5.12EV71 48D-160	VP1	11.667	12.118	0.838					5.12EV71 V3	GAPDH	12.486							0
12	A12	5.12EV71 48D-160	VP1	13.085	12.118	0.838					5.12EV71 V3	GAPDH	12.432							0
13	B1	5.12EV71 48-32	GAPDH	12.162	12.14	0.02					5.12EV71 48-6	VP1	11.184	11.2083	-1.16		-13.0257	8339.05		0.857673	0.84456	0.0554107
14	B2	5.12EV71 48-32	GAPDH	12.124	12.14	0.02					5.12EV71 48-6	VP1	11.127		-1.217		-13.0827	8675.11		0.892237
15	B3	5.12EV71 48-32	GAPDH	12.133	12.14	0.02					5.12EV71 48-6	VP1	11.314		-1.03		-12.8957	7620.48		0.783769
16	B4	5.12EV71 48-32	VP1	11.233	11.242	0.041					5.12EV71 48-6	GAPDH	12.371	12.344
17	B5	5.12EV71 48-32	VP1	11.205	11.242	0.041					5.12EV71 48-6	GAPDH	12.315
18	B6	5.12EV71 48-32	VP1	11.287	11.242	0.041					5.12EV71 48-6	GAPDH	12.346
19	B7	5.12EV71 48D-800	GAPDH	12.931	12.865	0.068					5.12EV71 48D-32	VP1	12.04	12.0533	-0.471667		-12.3373	5174.96		0.532246	0.527442	0.0120229
20	B8	5.12EV71 48D-800	GAPDH	12.868	12.865	0.068					5.12EV71 48D-32	VP1	12.029		-0.482667		-12.3483	5214.57		0.53632
21	B9	5.12EV71 48D-800	GAPDH	12.796	12.865	0.068					5.12EV71 48D-32	VP1	12.091		-0.420667		-12.2863	4995.22		0.51376
22	B10	5.12EV71 48D-800	VP1	12.868	12.954	0.076					5.12EV71 48D-32	GAPDH	12.542	12.5117
23	B11	5.12EV71 48D-800	VP1	12.983	12.954	0.076					5.12EV71 48D-32	GAPDH	12.483
24	B12	5.12EV71 48D-800	VP1	13.01	12.954	0.076					5.12EV71 48D-32	GAPDH	12.51
25	C1	5.12EV71 48-160	GAPDH	12.489	12.459	0.052					5.12EV71 48-160	VP1	12.238	12.3357	-0.221667		-12.0873	4351.61		0.447564	0.418911	0.0284302
26	C2	5.12EV71 48-160	GAPDH	12.49	12.459	0.052					5.12EV71 48-160	VP1	12.434		-0.0256667		-11.8913	3798.81		0.390709
27	C3	5.12EV71 48-160	GAPDH	12.4	12.459	0.052					5.12EV71 48-160	VP1	12.335		-0.124667		-11.9903	4068.65		0.418461
28	C4	5.12EV71 48-160	VP1	12.238	12.336	0.098					5.12EV71 48-160	GAPDH	12.489	12.4597
29	C5	5.12EV71 48-160	VP1	12.434	12.336	0.098					5.12EV71 48-160	GAPDH	12.49
30	C6	5.12EV71 48-160	VP1	12.335	12.336	0.098					5.12EV71 48-160	GAPDH	12.4
31	C7	5.12EV71 48D-4	GAPDH	14.047	14.088	0.038					5.12EV71 48-800	VP1	14.78	14.879	1.99067		-9.875	939.012		0.0965776	0.0903278	0.00646415
32	C8	5.12EV71 48D-4	GAPDH	14.097	14.088	0.038					5.12EV71 48-800	VP1	14.87		2.08067		-9.785	882.223		0.0907369
33	C9	5.12EV71 48D-4	GAPDH	14.121	14.088	0.038					5.12EV71 48-800	VP1	14.987		2.19767		-9.668	813.501		0.0836688
34	C10	5.12EV71 48D-4	VP1	16.7	16.707	0.047					5.12EV71 48-800	GAPDH	12.709	12.7893
35	C11	5.12EV71 48D-4	VP1	16.663	16.707	0.047					5.12EV71 48-800	GAPDH	13.218
36	C12	5.12EV71 48D-4	VP1	16.757	16.707	0.047					5.12EV71 48-800	GAPDH	12.441
37	D1	5.12EV71 48-800	GAPDH	12.709	12.789	0.394					5.12EV71 48D-4	VP1	16.7	16.7067	2.61167		-9.254	610.565		0.0627967	0.0625296	0.00204514
38	D2	5.12EV71 48-800	GAPDH	13.218	12.789	0.394					5.12EV71 48D-4	VP1	16.663		2.57467		-9.291	626.426		0.0644281
39	D3	5.12EV71 48-800	GAPDH	12.441	12.789	0.394					5.12EV71 48D-4	VP1	16.757		2.66867		-9.197	586.912		0.060364
40	D4	5.12EV71 48-800	VP1	14.78	14.879	0.104					5.12EV71 48D-4	GAPDH	14.047	14.0883
41	D5	5.12EV71 48-800	VP1	14.87	14.879	0.104					5.12EV71 48D-4	GAPDH	14.097
42	D6	5.12EV71 48-800	VP1	14.987	14.879	0.104					5.12EV71 48D-4	GAPDH	14.121
43	D7	5.12EV71 48D-20	GAPDH	14.363	14.334	0.056					5.12EV71 48D-20	VP1	20.379	20.4483	6.04467		-5.821	56.5322		0.00581435	0.00554798	0.000324914
44	D8	5.12EV71 48D-20	GAPDH	14.27	14.334	0.056					5.12EV71 48D-20	VP1	20.422		6.08767		-5.778	54.8721		0.00564361
45	D9	5.12EV71 48D-20	GAPDH	14.37	14.334	0.056					5.12EV71 48D-20	VP1	20.544		6.20967		-5.656	50.4226		0.00518598
46	D10	5.12EV71 48D-20	VP1	20.379	20.448	0.086					5.12EV71 48D-20	GAPDH	14.363	14.3343
47	D11	5.12EV71 48D-20	VP1	20.422	20.448	0.086					5.12EV71 48D-20	GAPDH	14.27
48	D12	5.12EV71 48D-20	VP1	20.544	20.448	0.086					5.12EV71 48D-20	GAPDH	14.37
49	E1	5.12EV71 48-4	GAPDH	13.829	13.792	0.04						VP1		#DIV/0!	#DIV/0!		#DIV/0!	#DIV/0!		#DIV/0!	#DIV/0!	#DIV/0!
50	E2	5.12EV71 48-4	GAPDH	13.797	13.792	0.04						VP1			#DIV/0!		#DIV/0!	#DIV/0!		#DIV/0!
51	E3	5.12EV71 48-4	GAPDH	13.75	13.792	0.04						VP1			#DIV/0!		#DIV/0!	#DIV/0!		#DIV/0!
52	E4	5.12EV71 48-4	VP1	15.467	15.395	0.063						GAPDH		#DIV/0!
53	E5	5.12EV71 48-4	VP1	15.352	15.395	0.063						GAPDH
54	E6	5.12EV71 48-4	VP1	15.366	15.395	0.063						GAPDH
55	E7	5.12EV71 V1	GAPDH	12.866	12.811	0.056						VP1		#DIV/0!	#DIV/0!		#DIV/0!	#DIV/0!		#DIV/0!	#DIV/0!	#DIV/0!
56	E8	5.12EV71 V1	GAPDH	12.754	12.811	0.056						VP1			#DIV/0!		#DIV/0!	#DIV/0!		#DIV/0!
57	E9	5.12EV71 V1	GAPDH	12.812	12.811	0.056						VP1			#DIV/0!		#DIV/0!	#DIV/0!		#DIV/0!
58	E10	5.12EV71 V1	VP1	11.112	11.163	0.049						GAPDH		#DIV/0!
59	E11	5.12EV71 V1	VP1	11.169	11.163	0.049						GAPDH
60	E12	5.12EV71 V1	VP1	11.209	11.163	0.049						GAPDH
61	F1	5.12EV71 48-20	GAPDH	14.79	14.796	0.011						VP1		#DIV/0!	#DIV/0!		#DIV/0!	#DIV/0!		#DIV/0!	#DIV/0!	#DIV/0!
62	F2	5.12EV71 48-20	GAPDH	14.809	14.796	0.011						VP1			#DIV/0!		#DIV/0!	#DIV/0!		#DIV/0!
63	F3	5.12EV71 48-20	GAPDH	14.789	14.796	0.011						VP1			#DIV/0!		#DIV/0!	#DIV/0!		#DIV/0!
64	F4	5.12EV71 48-20	VP1	21.767	21.811	0.078						GAPDH		#DIV/0!
65	F5	5.12EV71 48-20	VP1	21.766	21.811	0.078						GAPDH
66	F6	5.12EV71 48-20	VP1	21.901	21.811	0.078						GAPDH
67	F7	5.12EV71 V2	GAPDH	12.982	12.984	0.005						VP1		#DIV/0!	#DIV/0!		#DIV/0!	#DIV/0!		#DIV/0!	#DIV/0!	#DIV/0!
68	F8	5.12EV71 V2	GAPDH	12.99	12.984	0.005						VP1			#DIV/0!		#DIV/0!	#DIV/0!		#DIV/0!
69	F9	5.12EV71 V2	GAPDH	12.98	12.984	0.005						VP1			#DIV/0!		#DIV/0!	#DIV/0!		#DIV/0!
70	F10	5.12EV71 V2	VP1	11.159	11.232	0.071						GAPDH		#DIV/0!
71	F11	5.12EV71 V2	VP1	11.237	11.232	0.071						GAPDH
72	F12	5.12EV71 V2	VP1	11.301	11.232	0.071						GAPDH
73	G1	5.12EV71 48D-6	GAPDH	12.855	12.849	0.034						VP1		#DIV/0!	#DIV/0!		#DIV/0!	#DIV/0!		#DIV/0!	#DIV/0!	#DIV/0!
74	G2	5.12EV71 48D-6	GAPDH	12.879	12.849	0.034						VP1			#DIV/0!		#DIV/0!	#DIV/0!		#DIV/0!
75	G3	5.12EV71 48D-6	GAPDH	12.812	12.849	0.034						VP1			#DIV/0!		#DIV/0!	#DIV/0!		#DIV/0!
76	G4	5.12EV71 48D-6	VP1	11.971	12.01	0.041						GAPDH		#DIV/0!
77	G5	5.12EV71 48D-6	VP1	12.053	12.01	0.041						GAPDH
78	G6	5.12EV71 48D-6	VP1	12.005	12.01	0.041						GAPDH
79	G7	5.12EV71 V3	GAPDH	12.39	12.436	0.048						VP1		#DIV/0!	#DIV/0!		#DIV/0!	#DIV/0!		#DIV/0!	#DIV/0!	#DIV/0!
80	G8	5.12EV71 V3	GAPDH	12.486	12.436	0.048						VP1			#DIV/0!		#DIV/0!	#DIV/0!		#DIV/0!
81	G9	5.12EV71 V3	GAPDH	12.432	12.436	0.048						VP1			#DIV/0!		#DIV/0!	#DIV/0!		#DIV/0!
82	G10	5.12EV71 V3	VP1	11.01	11.057	0.105						GAPDH		#DIV/0!
83	G11	5.12EV71 V3	VP1	10.984	11.057	0.105						GAPDH
84	G12	5.12EV71 V3	VP1	11.177	11.057	0.105						GAPDH
85	H1	5.12EV71 48D-32	GAPDH	12.542	12.512	0.029						VP1		#DIV/0!	#DIV/0!		#DIV/0!	#DIV/0!		#DIV/0!	#DIV/0!	#DIV/0!
86	H2	5.12EV71 48D-32	GAPDH	12.483	12.512	0.029						VP1			#DIV/0!		#DIV/0!	#DIV/0!		#DIV/0!
87	H3	5.12EV71 48D-32	GAPDH	12.51	12.512	0.029						VP1			#DIV/0!		#DIV/0!	#DIV/0!		#DIV/0!
88	H4	5.12EV71 48D-32	VP1	12.04	12.053	0.033						GAPDH		#DIV/0!
89	H5	5.12EV71 48D-32	VP1	12.029	12.053	0.033						GAPDH
90	H6	5.12EV71 48D-32	VP1	12.091	12.053	0.033						GAPDH
91	H7	5.12EV71 C1	GAPDH	12.146	12.069	0.067						VP1		#DIV/0!	#DIV/0!		#DIV/0!	#DIV/0!		#DIV/0!	#DIV/0!	#DIV/0!
92	H8	5.12EV71 C1	GAPDH	12.021	12.069	0.067						VP1			#DIV/0!		#DIV/0!	#DIV/0!		#DIV/0!
93	H9	5.12EV71 C1	GAPDH	12.039	12.069	0.067						VP1			#DIV/0!		#DIV/0!	#DIV/0!		#DIV/0!
94	H10	5.12EV71 C1	VP1	23.829	23.934	0.224						GAPDH		#DIV/0!
95	H11	5.12EV71 C1	VP1	23.782	23.934	0.224						GAPDH
96	H12	5.12EV71 C1	VP1	24.192	23.934	0.224						GAPDH
Analysis Type = Singleplex
Endogenous Control = ACTIN
RQ Min/Max Confidence Level = 95.0
Reference Sample = EV71016160NM

## Sheet: 常用 2-ΔCт模版  1 V作对照 (3)
Well	Well Position	Sample Name	Target Name	CT	Ct Mean	Ct SD			Sample Name	Target Name	CT	mean	ΔCT		ΔΔCT	2-ΔΔCT	mean	SD
1	A1	5.12EV71 48-6	GAPDH	12.371	12.344	0.028			NC-100	PTGS1-1	24.662	24.5587	13.5063		2.21167	0.215885	0.232231	0.0147102
2	A2	5.12EV71 48-6	GAPDH	12.315	12.344	0.028			NC-100	PTGS1-1	24.531		13.3753		2.08067	0.236405
3	A3	5.12EV71 48-6	GAPDH	12.346	12.344	0.028			NC-100	PTGS1-1	24.483		13.3273		2.03267	0.244403
4	A4	5.12EV71 48-6	VP1	11.184	11.208	0.096			NC-100	GAPDH	11.072	11.1557
5	A5	5.12EV71 48-6	VP1	11.127	11.208	0.096			NC-100	GAPDH	11.162
6	A6	5.12EV71 48-6	VP1	11.314	11.208	0.096			NC-100	GAPDH	11.233
7	A7	5.12EV71 48D-160	GAPDH	12.73	12.726	0.058			NC-50	PTGS1-1	25.049	24.9973	11.3463	11.2947	0.0516667	0.964821	1.00098	0.0546776
8	A8	5.12EV71 48D-160	GAPDH	12.782	12.726	0.058			NC-50	PTGS1-1	25.035		11.3323		0.0376667	0.974229
9	A9	5.12EV71 48D-160	GAPDH	12.666	12.726	0.058			NC-50	PTGS1-1	24.908		11.2053		-0.0893333	1.06388
10	A10	5.12EV71 48D-160	VP1	11.603	12.118	0.838			NC-50	GAPDH	13.918	13.7027
11	A11	5.12EV71 48D-160	VP1	11.667	12.118	0.838			NC-50	GAPDH	13.684
12	A12	5.12EV71 48D-160	VP1	13.085	12.118	0.838			NC-50	GAPDH	13.506
13	B1	5.12EV71 48-32	GAPDH	12.162	12.14	0.02			SIRNA-1-50	PTGS1-1	24.423	24.438	13.1313		1.83667	0.279968	0.277211	0.0106852
14	B2	5.12EV71 48-32	GAPDH	12.124	12.14	0.02			SIRNA-1-50	PTGS1-1	24.5		13.2083		1.91367	0.265417
15	B3	5.12EV71 48-32	GAPDH	12.133	12.14	0.02			SIRNA-1-50	PTGS1-1	24.391		13.0993		1.80467	0.286247
16	B4	5.12EV71 48-32	VP1	11.233	11.242	0.041			SIRNA-1-50	GAPDH	11.168	11.2917
17	B5	5.12EV71 48-32	VP1	11.205	11.242	0.041			SIRNA-1-50	GAPDH	11.246
18	B6	5.12EV71 48-32	VP1	11.287	11.242	0.041			SIRNA-1-50	GAPDH	11.461
19	B7	5.12EV71 48D-800	GAPDH	12.931	12.865	0.068			SIRNA-1-100	PTGS1-1	24.912	24.874	13.2593		1.96467	0.256198	0.263285	0.0141519
20	B8	5.12EV71 48D-800	GAPDH	12.868	12.865	0.068			SIRNA-1-100	PTGS1-1	24.786		13.1333		1.83867	0.27958
21	B9	5.12EV71 48D-800	GAPDH	12.796	12.865	0.068			SIRNA-1-100	PTGS1-1	24.924		13.2713		1.97667	0.254076
22	B10	5.12EV71 48D-800	VP1	12.868	12.954	0.076			SIRNA-1-100	GAPDH	11.549	11.6527
23	B11	5.12EV71 48D-800	VP1	12.983	12.954	0.076			SIRNA-1-100	GAPDH	11.734
24	B12	5.12EV71 48D-800	VP1	13.01	12.954	0.076			SIRNA-1-100	GAPDH	11.675
25	C1	5.12EV71 48-160	GAPDH	12.489	12.459	0.052			SIRNA-2-50	PTGS1-1	24.45	24.4243	12.9833		1.68867	0.310213	0.315837	0.00727996
26	C2	5.12EV71 48-160	GAPDH	12.49	12.459	0.052			SIRNA-2-50	PTGS1-1	24.436		12.9693		1.67467	0.313238
27	C3	5.12EV71 48-160	GAPDH	12.4	12.459	0.052			SIRNA-2-50	PTGS1-1	24.387		12.9203		1.62567	0.32406
28	C4	5.12EV71 48-160	VP1	12.238	12.336	0.098			SIRNA-2-50	GAPDH	11.435	11.4667
29	C5	5.12EV71 48-160	VP1	12.434	12.336	0.098			SIRNA-2-50	GAPDH	11.492
30	C6	5.12EV71 48-160	VP1	12.335	12.336	0.098			SIRNA-2-50	GAPDH	11.473
31	C7	5.12EV71 48D-4	GAPDH	14.047	14.088	0.038			SIRNA-2-100	PTGS1-1	25.019	24.9397	13.2617		1.967	0.255784	0.270498	0.0143256
32	C8	5.12EV71 48D-4	GAPDH	14.097	14.088	0.038			SIRNA-2-100	PTGS1-1	24.866		13.1087		1.814	0.284401
33	C9	5.12EV71 48D-4	GAPDH	14.121	14.088	0.038			SIRNA-2-100	PTGS1-1	24.934		13.1767		1.882	0.271307
34	C10	5.12EV71 48D-4	VP1	16.7	16.707	0.047			SIRNA-2-100	GAPDH	11.684	11.7573
35	C11	5.12EV71 48D-4	VP1	16.663	16.707	0.047			SIRNA-2-100	GAPDH	11.882
36	C12	5.12EV71 48D-4	VP1	16.757	16.707	0.047			SIRNA-2-100	GAPDH	11.706
37	D1	5.12EV71 48-800	GAPDH	12.709	12.789	0.394			SIRNA-3-50	PTGS1-1	24.494	24.418	13.279		1.98433	0.25273	0.266647	0.0140419
38	D2	5.12EV71 48-800	GAPDH	13.218	12.789	0.394			SIRNA-3-50	PTGS1-1	24.342		13.127		1.83233	0.28081
39	D3	5.12EV71 48-800	GAPDH	12.441	12.789	0.394			SIRNA-3-50	PTGS1-1	24.418		13.203		1.90833	0.2664
40	D4	5.12EV71 48-800	VP1	14.78	14.879	0.104			SIRNA-3-50	GAPDH	11.295	11.215
41	D5	5.12EV71 48-800	VP1	14.87	14.879	0.104			SIRNA-3-50	GAPDH	11.129
42	D6	5.12EV71 48-800	VP1	14.987	14.879	0.104			SIRNA-3-50	GAPDH	11.221
43	D7	5.12EV71 48D-20	GAPDH	14.363	14.334	0.056			SIRNA-3-100	PTGS1-1	25.28	24.9127	13.8143		2.51967	0.174383	0.228458	0.0468635
44	D8	5.12EV71 48D-20	GAPDH	14.27	14.334	0.056			SIRNA-3-100	PTGS1-1	24.739		13.2733		1.97867	0.253724
45	D9	5.12EV71 48D-20	GAPDH	14.37	14.334	0.056			SIRNA-3-100	PTGS1-1	24.719		13.2533		1.95867	0.257266
46	D10	5.12EV71 48D-20	VP1	20.379	20.448	0.086			SIRNA-3-100	GAPDH	11.406	11.4657
47	D11	5.12EV71 48D-20	VP1	20.422	20.448	0.086			SIRNA-3-100	GAPDH	11.445
48	D12	5.12EV71 48D-20	VP1	20.544	20.448	0.086			SIRNA-3-100	GAPDH	11.546
49	E1	5.12EV71 48-4	GAPDH	13.829	13.792	0.04						#DIV/0!	#DIV/0!		#DIV/0!	#DIV/0!	#DIV/0!	#DIV/0!
50	E2	5.12EV71 48-4	GAPDH	13.797	13.792	0.04							#DIV/0!		#DIV/0!	#DIV/0!
51	E3	5.12EV71 48-4	GAPDH	13.75	13.792	0.04							#DIV/0!		#DIV/0!	#DIV/0!
52	E4	5.12EV71 48-4	VP1	15.467	15.395	0.063						#DIV/0!
53	E5	5.12EV71 48-4	VP1	15.352	15.395	0.063
54	E6	5.12EV71 48-4	VP1	15.366	15.395	0.063
55	E7	5.12EV71 V1	GAPDH	12.866	12.811	0.056						#DIV/0!	#DIV/0!		#DIV/0!	#DIV/0!	#DIV/0!	#DIV/0!
56	E8	5.12EV71 V1	GAPDH	12.754	12.811	0.056							#DIV/0!		#DIV/0!	#DIV/0!
57	E9	5.12EV71 V1	GAPDH	12.812	12.811	0.056							#DIV/0!		#DIV/0!	#DIV/0!
58	E10	5.12EV71 V1	VP1	11.112	11.163	0.049						#DIV/0!
59	E11	5.12EV71 V1	VP1	11.169	11.163	0.049
60	E12	5.12EV71 V1	VP1	11.209	11.163	0.049
61	F1	5.12EV71 48-20	GAPDH	14.79	14.796	0.011						#DIV/0!	#DIV/0!		#DIV/0!	#DIV/0!	#DIV/0!	#DIV/0!
62	F2	5.12EV71 48-20	GAPDH	14.809	14.796	0.011							#DIV/0!		#DIV/0!	#DIV/0!
63	F3	5.12EV71 48-20	GAPDH	14.789	14.796	0.011							#DIV/0!		#DIV/0!	#DIV/0!
64	F4	5.12EV71 48-20	VP1	21.767	21.811	0.078						#DIV/0!
65	F5	5.12EV71 48-20	VP1	21.766	21.811	0.078
66	F6	5.12EV71 48-20	VP1	21.901	21.811	0.078
67	F7	5.12EV71 V2	GAPDH	12.982	12.984	0.005						#DIV/0!	#DIV/0!		#DIV/0!	#DIV/0!	#DIV/0!	#DIV/0!
68	F8	5.12EV71 V2	GAPDH	12.99	12.984	0.005							#DIV/0!		#DIV/0!	#DIV/0!
69	F9	5.12EV71 V2	GAPDH	12.98	12.984	0.005							#DIV/0!		#DIV/0!	#DIV/0!
70	F10	5.12EV71 V2	VP1	11.159	11.232	0.071						#DIV/0!
71	F11	5.12EV71 V2	VP1	11.237	11.232	0.071
72	F12	5.12EV71 V2	VP1	11.301	11.232	0.071
73	G1	5.12EV71 48D-6	GAPDH	12.855	12.849	0.034						#DIV/0!	#DIV/0!		#DIV/0!	#DIV/0!	#DIV/0!	#DIV/0!
74	G2	5.12EV71 48D-6	GAPDH	12.879	12.849	0.034							#DIV/0!		#DIV/0!	#DIV/0!
75	G3	5.12EV71 48D-6	GAPDH	12.812	12.849	0.034							#DIV/0!		#DIV/0!	#DIV/0!
76	G4	5.12EV71 48D-6	VP1	11.971	12.01	0.041						#DIV/0!
77	G5	5.12EV71 48D-6	VP1	12.053	12.01	0.041
78	G6	5.12EV71 48D-6	VP1	12.005	12.01	0.041
79	G7	5.12EV71 V3	GAPDH	12.39	12.436	0.048						#DIV/0!	#DIV/0!		#DIV/0!	#DIV/0!	#DIV/0!	#DIV/0!
80	G8	5.12EV71 V3	GAPDH	12.486	12.436	0.048							#DIV/0!		#DIV/0!	#DIV/0!
81	G9	5.12EV71 V3	GAPDH	12.432	12.436	0.048							#DIV/0!		#DIV/0!	#DIV/0!
82	G10	5.12EV71 V3	VP1	11.01	11.057	0.105						#DIV/0!
83	G11	5.12EV71 V3	VP1	10.984	11.057	0.105
84	G12	5.12EV71 V3	VP1	11.177	11.057	0.105
85	H1	5.12EV71 48D-32	GAPDH	12.542	12.512	0.029						#DIV/0!	#DIV/0!		#DIV/0!	#DIV/0!	#DIV/0!	#DIV/0!
86	H2	5.12EV71 48D-32	GAPDH	12.483	12.512	0.029							#DIV/0!		#DIV/0!	#DIV/0!
87	H3	5.12EV71 48D-32	GAPDH	12.51	12.512	0.029							#DIV/0!		#DIV/0!	#DIV/0!
88	H4	5.12EV71 48D-32	VP1	12.04	12.053	0.033						#DIV/0!
89	H5	5.12EV71 48D-32	VP1	12.029	12.053	0.033
90	H6	5.12EV71 48D-32	VP1	12.091	12.053	0.033
91	H7	5.12EV71 C1	GAPDH	12.146	12.069	0.067						#DIV/0!	#DIV/0!		#DIV/0!	#DIV/0!	#DIV/0!	#DIV/0!
92	H8	5.12EV71 C1	GAPDH	12.021	12.069	0.067							#DIV/0!		#DIV/0!	#DIV/0!
93	H9	5.12EV71 C1	GAPDH	12.039	12.069	0.067							#DIV/0!		#DIV/0!	#DIV/0!
94	H10	5.12EV71 C1	VP1	23.829	23.934	0.224						#DIV/0!
95	H11	5.12EV71 C1	VP1	23.782	23.934	0.224
96	H12	5.12EV71 C1	VP1	24.192	23.934	0.224
Analysis Type = Singleplex
Endogenous Control = ACTIN
RQ Min/Max Confidence Level = 95.0
Reference Sample = EV71016160NM

## Sheet: 常用 2-ΔCт模版  1 V作对照
Well	Well Position	Sample Name	Target Name	CT	Ct Mean	Ct SD			Sample Name	Target Name	CT	mean	ΔCT		ΔΔCT	2-ΔΔCT	mean	SD
1	A1	5.12EV71 48-6	GAPDH	12.371	12.344	0.028			NC-50	PTGS1-1	25.049	24.9973	11.3463		0.501667	0.70629	0.732758	0.0400263
2	A2	5.12EV71 48-6	GAPDH	12.315	12.344	0.028			NC-50	PTGS1-1	25.035		11.3323		0.487667	0.713178
3	A3	5.12EV71 48-6	GAPDH	12.346	12.344	0.028			NC-50	PTGS1-1	24.908		11.2053		0.360667	0.778805
4	A4	5.12EV71 48-6	VP1	11.184	11.208	0.096			NC-50	GAPDH	13.918	13.7027
5	A5	5.12EV71 48-6	VP1	11.127	11.208	0.096			NC-50	GAPDH	13.684
6	A6	5.12EV71 48-6	VP1	11.314	11.208	0.096			NC-50	GAPDH	13.506
7	A7	5.12EV71 48D-160	GAPDH	12.73	12.726	0.058			NC-50	PTGS1-2	24.525	24.5473	10.8223	10.8447	-0.0223333	1.0156	1.0009	0.0514865
8	A8	5.12EV71 48D-160	GAPDH	12.782	12.726	0.058			NC-50	PTGS1-2	24.486		10.7833		-0.0613333	1.04343
9	A9	5.12EV71 48D-160	GAPDH	12.666	12.726	0.058			NC-50	PTGS1-2	24.631		10.9283		0.0836667	0.943656
10	A10	5.12EV71 48D-160	VP1	11.603	12.118	0.838			NC-50	GAPDH	13.918	13.7027
11	A11	5.12EV71 48D-160	VP1	11.667	12.118	0.838			NC-50	GAPDH	13.684
12	A12	5.12EV71 48D-160	VP1	13.085	12.118	0.838			NC-50	GAPDH	13.506
13	B1	5.12EV71 48-32	GAPDH	12.162	12.14	0.02			SIRNA-1-50	PTGS1-2	24.084	24.051	12.7923		1.94767	0.259235	0.265269	0.00532467
14	B2	5.12EV71 48-32	GAPDH	12.124	12.14	0.02			SIRNA-1-50	PTGS1-2	24.04		12.7483		1.90367	0.267263
15	B3	5.12EV71 48-32	GAPDH	12.133	12.14	0.02			SIRNA-1-50	PTGS1-2	24.029		12.7373		1.89267	0.269309
16	B4	5.12EV71 48-32	VP1	11.233	11.242	0.041			SIRNA-1-50	GAPDH	11.168	11.2917
17	B5	5.12EV71 48-32	VP1	11.205	11.242	0.041			SIRNA-1-50	GAPDH	11.246
18	B6	5.12EV71 48-32	VP1	11.287	11.242	0.041			SIRNA-1-50	GAPDH	11.461
19	B7	5.12EV71 48D-800	GAPDH	12.931	12.865	0.068			SIRNA-2-50	PTGS1-2	23.981	24.021	12.5143		1.66967	0.314326	0.305815	0.00879959
20	B8	5.12EV71 48D-800	GAPDH	12.868	12.865	0.068			SIRNA-2-50	PTGS1-2	24.018		12.5513		1.70667	0.306367
21	B9	5.12EV71 48D-800	GAPDH	12.796	12.865	0.068			SIRNA-2-50	PTGS1-2	24.064		12.5973		1.75267	0.296753
22	B10	5.12EV71 48D-800	VP1	12.868	12.954	0.076			SIRNA-2-50	GAPDH	11.435	11.4667
23	B11	5.12EV71 48D-800	VP1	12.983	12.954	0.076			SIRNA-2-50	GAPDH	11.492
24	B12	5.12EV71 48D-800	VP1	13.01	12.954	0.076			SIRNA-2-50	GAPDH	11.473
25	C1	5.12EV71 48-160	GAPDH	12.489	12.459	0.052			SIRNA-3-50	PTGS1-2	23.748	23.749	12.533		1.68833	0.310285	0.310082	0.00333487
26	C2	5.12EV71 48-160	GAPDH	12.49	12.459	0.052			SIRNA-3-50	PTGS1-2	23.734		12.519		1.67433	0.313311
27	C3	5.12EV71 48-160	GAPDH	12.4	12.459	0.052			SIRNA-3-50	PTGS1-2	23.765		12.55		1.70533	0.30665
28	C4	5.12EV71 48-160	VP1	12.238	12.336	0.098			SIRNA-3-50	GAPDH	11.295	11.215
29	C5	5.12EV71 48-160	VP1	12.434	12.336	0.098			SIRNA-3-50	GAPDH	11.129
30	C6	5.12EV71 48-160	VP1	12.335	12.336	0.098			SIRNA-3-50	GAPDH	11.221
31	C7	5.12EV71 48D-4	GAPDH	14.047	14.088	0.038			SIRNA-1-100	PTGS1-2	24.154	24.2007	12.5013		1.65667	0.317171	0.30754	0.0204315
32	C8	5.12EV71 48D-4	GAPDH	14.097	14.088	0.038			SIRNA-1-100	PTGS1-2	24.135		12.4823		1.63767	0.321376
33	C9	5.12EV71 48D-4	GAPDH	14.121	14.088	0.038			SIRNA-1-100	PTGS1-2	24.313		12.6603		1.81567	0.284073
34	C10	5.12EV71 48D-4	VP1	16.7	16.707	0.047			SIRNA-1-100	GAPDH	11.549	11.6527
35	C11	5.12EV71 48D-4	VP1	16.663	16.707	0.047			SIRNA-1-100	GAPDH	11.734
36	C12	5.12EV71 48D-4	VP1	16.757	16.707	0.047			SIRNA-1-100	GAPDH	11.675
37	D1	5.12EV71 48-800	GAPDH	12.709	12.789	0.394			SIRNA-2-100	PTGS1-2	23.946	24.0087	12.1887		1.344	0.393927	0.377415	0.0162297
38	D2	5.12EV71 48-800	GAPDH	13.218	12.789	0.394			SIRNA-2-100	PTGS1-2	24.07		12.3127		1.468	0.361483
39	D3	5.12EV71 48-800	GAPDH	12.441	12.789	0.394			SIRNA-2-100	PTGS1-2	24.01		12.2527		1.408	0.376834
40	D4	5.12EV71 48-800	VP1	14.78	14.879	0.104			SIRNA-2-100	GAPDH	11.684	11.7573
41	D5	5.12EV71 48-800	VP1	14.87	14.879	0.104			SIRNA-2-100	GAPDH	11.882
42	D6	5.12EV71 48-800	VP1	14.987	14.879	0.104			SIRNA-2-100	GAPDH	11.706
43	D7	5.12EV71 48D-20	GAPDH	14.363	14.334	0.056			SIRNA-3-100	PTGS1-2	23.895	23.902	12.4293		1.58467	0.333402	0.331953	0.0127976
44	D8	5.12EV71 48D-20	GAPDH	14.27	14.334	0.056			SIRNA-3-100	PTGS1-2	23.961		12.4953		1.65067	0.318493
45	D9	5.12EV71 48D-20	GAPDH	14.37	14.334	0.056			SIRNA-3-100	PTGS1-2	23.85		12.3843		1.53967	0.343965
46	D10	5.12EV71 48D-20	VP1	20.379	20.448	0.086			SIRNA-3-100	GAPDH	11.406	11.4657
47	D11	5.12EV71 48D-20	VP1	20.422	20.448	0.086			SIRNA-3-100	GAPDH	11.445
48	D12	5.12EV71 48D-20	VP1	20.544	20.448	0.086			SIRNA-3-100	GAPDH	11.546
49	E1	5.12EV71 48-4	GAPDH	13.829	13.792	0.04			SIRNA-3-100	GAPDH	11.546	11.546	#DIV/0!		#DIV/0!	#DIV/0!	#DIV/0!	#DIV/0!
50	E2	5.12EV71 48-4	GAPDH	13.797	13.792	0.04							#DIV/0!		#DIV/0!	#DIV/0!
51	E3	5.12EV71 48-4	GAPDH	13.75	13.792	0.04							#DIV/0!		#DIV/0!	#DIV/0!
52	E4	5.12EV71 48-4	VP1	15.467	15.395	0.063						#DIV/0!
53	E5	5.12EV71 48-4	VP1	15.352	15.395	0.063
54	E6	5.12EV71 48-4	VP1	15.366	15.395	0.063
55	E7	5.12EV71 V1	GAPDH	12.866	12.811	0.056						#DIV/0!	#DIV/0!		#DIV/0!	#DIV/0!	#DIV/0!	#DIV/0!
56	E8	5.12EV71 V1	GAPDH	12.754	12.811	0.056							#DIV/0!		#DIV/0!	#DIV/0!
57	E9	5.12EV71 V1	GAPDH	12.812	12.811	0.056							#DIV/0!		#DIV/0!	#DIV/0!
58	E10	5.12EV71 V1	VP1	11.112	11.163	0.049						#DIV/0!
59	E11	5.12EV71 V1	VP1	11.169	11.163	0.049
60	E12	5.12EV71 V1	VP1	11.209	11.163	0.049
61	F1	5.12EV71 48-20	GAPDH	14.79	14.796	0.011						#DIV/0!	#DIV/0!		#DIV/0!	#DIV/0!	#DIV/0!	#DIV/0!
62	F2	5.12EV71 48-20	GAPDH	14.809	14.796	0.011							#DIV/0!		#DIV/0!	#DIV/0!
63	F3	5.12EV71 48-20	GAPDH	14.789	14.796	0.011							#DIV/0!		#DIV/0!	#DIV/0!
64	F4	5.12EV71 48-20	VP1	21.767	21.811	0.078						#DIV/0!
65	F5	5.12EV71 48-20	VP1	21.766	21.811	0.078
66	F6	5.12EV71 48-20	VP1	21.901	21.811	0.078
67	F7	5.12EV71 V2	GAPDH	12.982	12.984	0.005						#DIV/0!	#DIV/0!		#DIV/0!	#DIV/0!	#DIV/0!	#DIV/0!
68	F8	5.12EV71 V2	GAPDH	12.99	12.984	0.005							#DIV/0!		#DIV/0!	#DIV/0!
69	F9	5.12EV71 V2	GAPDH	12.98	12.984	0.005							#DIV/0!		#DIV/0!	#DIV/0!
70	F10	5.12EV71 V2	VP1	11.159	11.232	0.071						#DIV/0!
71	F11	5.12EV71 V2	VP1	11.237	11.232	0.071
72	F12	5.12EV71 V2	VP1	11.301	11.232	0.071
73	G1	5.12EV71 48D-6	GAPDH	12.855	12.849	0.034						#DIV/0!	#DIV/0!		#DIV/0!	#DIV/0!	#DIV/0!	#DIV/0!
74	G2	5.12EV71 48D-6	GAPDH	12.879	12.849	0.034							#DIV/0!		#DIV/0!	#DIV/0!
75	G3	5.12EV71 48D-6	GAPDH	12.812	12.849	0.034							#DIV/0!		#DIV/0!	#DIV/0!
76	G4	5.12EV71 48D-6	VP1	11.971	12.01	0.041						#DIV/0!
77	G5	5.12EV71 48D-6	VP1	12.053	12.01	0.041
78	G6	5.12EV71 48D-6	VP1	12.005	12.01	0.041
79	G7	5.12EV71 V3	GAPDH	12.39	12.436	0.048						#DIV/0!	#DIV/0!		#DIV/0!	#DIV/0!	#DIV/0!	#DIV/0!
80	G8	5.12EV71 V3	GAPDH	12.486	12.436	0.048							#DIV/0!		#DIV/0!	#DIV/0!
81	G9	5.12EV71 V3	GAPDH	12.432	12.436	0.048							#DIV/0!		#DIV/0!	#DIV/0!
82	G10	5.12EV71 V3	VP1	11.01	11.057	0.105						#DIV/0!
83	G11	5.12EV71 V3	VP1	10.984	11.057	0.105
84	G12	5.12EV71 V3	VP1	11.177	11.057	0.105
85	H1	5.12EV71 48D-32	GAPDH	12.542	12.512	0.029						#DIV/0!	#DIV/0!		#DIV/0!	#DIV/0!	#DIV/0!	#DIV/0!
86	H2	5.12EV71 48D-32	GAPDH	12.483	12.512	0.029							#DIV/0!		#DIV/0!	#DIV/0!
87	H3	5.12EV71 48D-32	GAPDH	12.51	12.512	0.029							#DIV/0!		#DIV/0!	#DIV/0!
88	H4	5.12EV71 48D-32	VP1	12.04	12.053	0.033						#DIV/0!
89	H5	5.12EV71 48D-32	VP1	12.029	12.053	0.033
90	H6	5.12EV71 48D-32	VP1	12.091	12.053	0.033
91	H7	5.12EV71 C1	GAPDH	12.146	12.069	0.067						#DIV/0!	#DIV/0!		#DIV/0!	#DIV/0!	#DIV/0!	#DIV/0!
92	H8	5.12EV71 C1	GAPDH	12.021	12.069	0.067							#DIV/0!		#DIV/0!	#DIV/0!
93	H9	5.12EV71 C1	GAPDH	12.039	12.069	0.067							#DIV/0!		#DIV/0!	#DIV/0!
94	H10	5.12EV71 C1	VP1	23.829	23.934	0.224						#DIV/0!
95	H11	5.12EV71 C1	VP1	23.782	23.934	0.224
96	H12	5.12EV71 C1	VP1	24.192	23.934	0.224
Analysis Type = Singleplex
Endogenous Control = ACTIN
RQ Min/Max Confidence Level = 95.0
Reference Sample = EV71016160NM

## Sheet: 常用 2-ΔCт模版  1 V作对照 (2)
Well	Well Position	Sample Name	Target Name	CT	Ct Mean	Ct SD			Sample Name	Target Name	CT	mean	ΔCT		ΔΔCT	2-ΔΔCT	mean	SD
1	A1	5.12EV71 48-6	GAPDH	12.371	12.344	0.028			NC-50	PTGS1-2	24.525	24.5473	10.8223		-0.553	1.46713	1.44589	0.0743773
2	A2	5.12EV71 48-6	GAPDH	12.315	12.344	0.028			NC-50	PTGS1-2	24.486		10.7833		-0.592	1.50733
3	A3	5.12EV71 48-6	GAPDH	12.346	12.344	0.028			NC-50	PTGS1-2	24.631		10.9283		-0.447	1.3632
4	A4	5.12EV71 48-6	VP1	11.184	11.208	0.096			NC-50	GAPDH	13.918	13.7027
5	A5	5.12EV71 48-6	VP1	11.127	11.208	0.096			NC-50	GAPDH	13.684
6	A6	5.12EV71 48-6	VP1	11.314	11.208	0.096			NC-50	GAPDH	13.506
7	A7	5.12EV71 48D-160	GAPDH	12.73	12.726	0.058			NC-50	PTGS1-3	25.179	25.078	11.4763	11.3753	0.101	0.932386	1.00327	0.100935
8	A8	5.12EV71 48D-160	GAPDH	12.782	12.726	0.058			NC-50	PTGS1-3	24.916		11.2133		-0.162	1.11884
9	A9	5.12EV71 48D-160	GAPDH	12.666	12.726	0.058			NC-50	PTGS1-3	25.139		11.4363		0.061	0.958599
10	A10	5.12EV71 48D-160	VP1	11.603	12.118	0.838			NC-50	GAPDH	13.918	13.7027
11	A11	5.12EV71 48D-160	VP1	11.667	12.118	0.838			NC-50	GAPDH	13.684
12	A12	5.12EV71 48D-160	VP1	13.085	12.118	0.838			NC-50	GAPDH	13.506
13	B1	5.12EV71 48-32	GAPDH	12.162	12.14	0.02			SIRNA-1-50	PTGS1-3	24.358	24.4203	13.0663		1.691	0.309712	0.296762	0.0114934
14	B2	5.12EV71 48-32	GAPDH	12.124	12.14	0.02			SIRNA-1-50	PTGS1-3	24.439		13.1473		1.772	0.292803
15	B3	5.12EV71 48-32	GAPDH	12.133	12.14	0.02			SIRNA-1-50	PTGS1-3	24.464		13.1723		1.797	0.287772
16	B4	5.12EV71 48-32	VP1	11.233	11.242	0.041			SIRNA-1-50	GAPDH	11.168	11.2917
17	B5	5.12EV71 48-32	VP1	11.205	11.242	0.041			SIRNA-1-50	GAPDH	11.246
18	B6	5.12EV71 48-32	VP1	11.287	11.242	0.041			SIRNA-1-50	GAPDH	11.461
19	B7	5.12EV71 48D-800	GAPDH	12.931	12.865	0.068			SIRNA-2-50	PTGS1-3	24.243	24.2963	12.7763		1.401	0.378667	0.365094	0.0136567
20	B8	5.12EV71 48D-800	GAPDH	12.868	12.865	0.068			SIRNA-2-50	PTGS1-3	24.351		12.8843		1.509	0.351355
21	B9	5.12EV71 48D-800	GAPDH	12.796	12.865	0.068			SIRNA-2-50	PTGS1-3	24.295		12.8283		1.453	0.365261
22	B10	5.12EV71 48D-800	VP1	12.868	12.954	0.076			SIRNA-2-50	GAPDH	11.435	11.4667
23	B11	5.12EV71 48D-800	VP1	12.983	12.954	0.076			SIRNA-2-50	GAPDH	11.492
24	B12	5.12EV71 48D-800	VP1	13.01	12.954	0.076			SIRNA-2-50	GAPDH	11.473
25	C1	5.12EV71 48-160	GAPDH	12.489	12.459	0.052			SIRNA-3-50	PTGS1-3	23.984	23.989	12.769		1.39367	0.380596	0.379401	0.0117263
26	C2	5.12EV71 48-160	GAPDH	12.49	12.459	0.052			SIRNA-3-50	PTGS1-3	24.036		12.821		1.44567	0.367122
27	C3	5.12EV71 48-160	GAPDH	12.4	12.459	0.052			SIRNA-3-50	PTGS1-3	23.947		12.732		1.35667	0.390483
28	C4	5.12EV71 48-160	VP1	12.238	12.336	0.098			SIRNA-3-50	GAPDH	11.295	11.215
29	C5	5.12EV71 48-160	VP1	12.434	12.336	0.098			SIRNA-3-50	GAPDH	11.129
30	C6	5.12EV71 48-160	VP1	12.335	12.336	0.098			SIRNA-3-50	GAPDH	11.221
31	C7	5.12EV71 48D-4	GAPDH	14.047	14.088	0.038			SIRNA-1-100	PTGS1-3	24.43	24.4123	12.7773		1.402	0.378404	0.383322	0.0172367
32	C8	5.12EV71 48D-4	GAPDH	14.097	14.088	0.038			SIRNA-1-100	PTGS1-3	24.466		12.8133		1.438	0.369079
33	C9	5.12EV71 48D-4	GAPDH	14.121	14.088	0.038			SIRNA-1-100	PTGS1-3	24.341		12.6883		1.313	0.402483
34	C10	5.12EV71 48D-4	VP1	16.7	16.707	0.047			SIRNA-1-100	GAPDH	11.549	11.6527
35	C11	5.12EV71 48D-4	VP1	16.663	16.707	0.047			SIRNA-1-100	GAPDH	11.734
36	C12	5.12EV71 48D-4	VP1	16.757	16.707	0.047			SIRNA-1-100	GAPDH	11.675
37	D1	5.12EV71 48-800	GAPDH	12.709	12.789	0.394			SIRNA-2-100	PTGS1-3	24.197	24.1817	12.4397		1.06433	0.478194	0.483361	0.00923953
38	D2	5.12EV71 48-800	GAPDH	13.218	12.789	0.394			SIRNA-2-100	PTGS1-3	24.15		12.3927		1.01733	0.494029
39	D3	5.12EV71 48-800	GAPDH	12.441	12.789	0.394			SIRNA-2-100	PTGS1-3	24.198		12.4407		1.06533	0.477862
40	D4	5.12EV71 48-800	VP1	14.78	14.879	0.104			SIRNA-2-100	GAPDH	11.684	11.7573
41	D5	5.12EV71 48-800	VP1	14.87	14.879	0.104			SIRNA-2-100	GAPDH	11.882
42	D6	5.12EV71 48-800	VP1	14.987	14.879	0.104			SIRNA-2-100	GAPDH	11.706
43	D7	5.12EV71 48D-20	GAPDH	14.363	14.334	0.056			SIRNA-3-100	PTGS1-3	24.067	24.082	12.6013		1.226	0.427501	0.423171	0.0107417
44	D8	5.12EV71 48D-20	GAPDH	14.27	14.334	0.056			SIRNA-3-100	PTGS1-3	24.055		12.5893		1.214	0.431072
45	D9	5.12EV71 48D-20	GAPDH	14.37	14.334	0.056			SIRNA-3-100	PTGS1-3	24.124		12.6583		1.283	0.41094
46	D10	5.12EV71 48D-20	VP1	20.379	20.448	0.086			SIRNA-3-100	GAPDH	11.406	11.4657
47	D11	5.12EV71 48D-20	VP1	20.422	20.448	0.086			SIRNA-3-100	GAPDH	11.445
48	D12	5.12EV71 48D-20	VP1	20.544	20.448	0.086			SIRNA-3-100	GAPDH	11.546
49	E1	5.12EV71 48-4	GAPDH	13.829	13.792	0.04						#DIV/0!	#DIV/0!		#DIV/0!	#DIV/0!	#DIV/0!	#DIV/0!
50	E2	5.12EV71 48-4	GAPDH	13.797	13.792	0.04							#DIV/0!		#DIV/0!	#DIV/0!
51	E3	5.12EV71 48-4	GAPDH	13.75	13.792	0.04							#DIV/0!		#DIV/0!	#DIV/0!
52	E4	5.12EV71 48-4	VP1	15.467	15.395	0.063						#DIV/0!
53	E5	5.12EV71 48-4	VP1	15.352	15.395	0.063
54	E6	5.12EV71 48-4	VP1	15.366	15.395	0.063
55	E7	5.12EV71 V1	GAPDH	12.866	12.811	0.056						#DIV/0!	#DIV/0!		#DIV/0!	#DIV/0!	#DIV/0!	#DIV/0!
56	E8	5.12EV71 V1	GAPDH	12.754	12.811	0.056							#DIV/0!		#DIV/0!	#DIV/0!
57	E9	5.12EV71 V1	GAPDH	12.812	12.811	0.056							#DIV/0!		#DIV/0!	#DIV/0!
58	E10	5.12EV71 V1	VP1	11.112	11.163	0.049						#DIV/0!
59	E11	5.12EV71 V1	VP1	11.169	11.163	0.049
60	E12	5.12EV71 V1	VP1	11.209	11.163	0.049
61	F1	5.12EV71 48-20	GAPDH	14.79	14.796	0.011						#DIV/0!	#DIV/0!		#DIV/0!	#DIV/0!	#DIV/0!	#DIV/0!
62	F2	5.12EV71 48-20	GAPDH	14.809	14.796	0.011							#DIV/0!		#DIV/0!	#DIV/0!
63	F3	5.12EV71 48-20	GAPDH	14.789	14.796	0.011							#DIV/0!		#DIV/0!	#DIV/0!
64	F4	5.12EV71 48-20	VP1	21.767	21.811	0.078						#DIV/0!
65	F5	5.12EV71 48-20	VP1	21.766	21.811	0.078
66	F6	5.12EV71 48-20	VP1	21.901	21.811	0.078
67	F7	5.12EV71 V2	GAPDH	12.982	12.984	0.005						#DIV/0!	#DIV/0!		#DIV/0!	#DIV/0!	#DIV/0!	#DIV/0!
68	F8	5.12EV71 V2	GAPDH	12.99	12.984	0.005							#DIV/0!		#DIV/0!	#DIV/0!
69	F9	5.12EV71 V2	GAPDH	12.98	12.984	0.005							#DIV/0!		#DIV/0!	#DIV/0!
70	F10	5.12EV71 V2	VP1	11.159	11.232	0.071						#DIV/0!
71	F11	5.12EV71 V2	VP1	11.237	11.232	0.071
72	F12	5.12EV71 V2	VP1	11.301	11.232	0.071
73	G1	5.12EV71 48D-6	GAPDH	12.855	12.849	0.034						#DIV/0!	#DIV/0!		#DIV/0!	#DIV/0!	#DIV/0!	#DIV/0!
74	G2	5.12EV71 48D-6	GAPDH	12.879	12.849	0.034							#DIV/0!		#DIV/0!	#DIV/0!
75	G3	5.12EV71 48D-6	GAPDH	12.812	12.849	0.034							#DIV/0!		#DIV/0!	#DIV/0!
76	G4	5.12EV71 48D-6	VP1	11.971	12.01	0.041						#DIV/0!
77	G5	5.12EV71 48D-6	VP1	12.053	12.01	0.041
78	G6	5.12EV71 48D-6	VP1	12.005	12.01	0.041
79	G7	5.12EV71 V3	GAPDH	12.39	12.436	0.048						#DIV/0!	#DIV/0!		#DIV/0!	#DIV/0!	#DIV/0!	#DIV/0!
80	G8	5.12EV71 V3	GAPDH	12.486	12.436	0.048							#DIV/0!		#DIV/0!	#DIV/0!
81	G9	5.12EV71 V3	GAPDH	12.432	12.436	0.048							#DIV/0!		#DIV/0!	#DIV/0!
82	G10	5.12EV71 V3	VP1	11.01	11.057	0.105						#DIV/0!
83	G11	5.12EV71 V3	VP1	10.984	11.057	0.105
84	G12	5.12EV71 V3	VP1	11.177	11.057	0.105
85	H1	5.12EV71 48D-32	GAPDH	12.542	12.512	0.029						#DIV/0!	#DIV/0!		#DIV/0!	#DIV/0!	#DIV/0!	#DIV/0!
86	H2	5.12EV71 48D-32	GAPDH	12.483	12.512	0.029							#DIV/0!		#DIV/0!	#DIV/0!
87	H3	5.12EV71 48D-32	GAPDH	12.51	12.512	0.029							#DIV/0!		#DIV/0!	#DIV/0!
88	H4	5.12EV71 48D-32	VP1	12.04	12.053	0.033						#DIV/0!
89	H5	5.12EV71 48D-32	VP1	12.029	12.053	0.033
90	H6	5.12EV71 48D-32	VP1	12.091	12.053	0.033
91	H7	5.12EV71 C1	GAPDH	12.146	12.069	0.067						#DIV/0!	#DIV/0!		#DIV/0!	#DIV/0!	#DIV/0!	#DIV/0!
92	H8	5.12EV71 C1	GAPDH	12.021	12.069	0.067							#DIV/0!		#DIV/0!	#DIV/0!
93	H9	5.12EV71 C1	GAPDH	12.039	12.069	0.067							#DIV/0!		#DIV/0!	#DIV/0!
94	H10	5.12EV71 C1	VP1	23.829	23.934	0.224						#DIV/0!
95	H11	5.12EV71 C1	VP1	23.782	23.934	0.224
96	H12	5.12EV71 C1	VP1	24.192	23.934	0.224
Analysis Type = Singleplex
Endogenous Control = ACTIN
RQ Min/Max Confidence Level = 95.0
Reference Sample = EV71016160NM

## Sheet: Sheet1
Well Position	Sample Name	Target Name	CT
A1	NC-50	PTGS1-1	25.049		NC-50	PTGS1-1	25.049		NC-100	PTGS1-1	24.662		NC-100	PTGS1-2	24.045		NC-100	PTGS1-3	24.008
A2	NC-50	PTGS1-1	25.035		NC-50	PTGS1-1	25.035		NC-100	PTGS1-1	24.531		NC-100	PTGS1-2	23.986		NC-100	PTGS1-3	24.06
A3	NC-50	PTGS1-1	24.908		NC-50	PTGS1-1	24.908		NC-100	PTGS1-1	24.483		NC-100	PTGS1-2	24.007		NC-100	PTGS1-3	23.968
A4	NC-50	PTGS1-2	24.525		NC-50	PTGS1-2	24.525		NC-100	GAPDH	11.072		NC-100	GAPDH	11.072		NC-100	GAPDH	11.072
A5	NC-50	PTGS1-2	24.486		NC-50	PTGS1-2	24.486		NC-100	GAPDH	11.162		NC-100	GAPDH	11.162		NC-100	GAPDH	11.162
A6	NC-50	PTGS1-2	24.631		NC-50	PTGS1-2	24.631		NC-100	GAPDH	11.233		NC-100	GAPDH	11.233		NC-100	GAPDH	11.233
A7	NC-50	PTGS1-3	25.179		NC-50	PTGS1-3	25.179
A8	NC-50	PTGS1-3	24.916		NC-50	PTGS1-3	24.916		SIRNA-1-50	PTGS1-1	24.423		SIRNA-1-50	PTGS1-2	24.084		SIRNA-1-50	PTGS1-3	24.358
A9	NC-50	PTGS1-3	25.139		NC-50	PTGS1-3	25.139		SIRNA-1-50	PTGS1-1	24.5		SIRNA-1-50	PTGS1-2	24.04		SIRNA-1-50	PTGS1-3	24.439
A10	NC-50	GAPDH	13.918		NC-50	GAPDH	13.918		SIRNA-1-50	PTGS1-1	24.391		SIRNA-1-50	PTGS1-2	24.029		SIRNA-1-50	PTGS1-3	24.464
A11	NC-50	GAPDH	13.684		NC-50	GAPDH	13.684		SIRNA-1-50	GAPDH	11.168		SIRNA-1-50	GAPDH	11.168		SIRNA-1-50	GAPDH	11.168
A12	NC-50	GAPDH	13.506		NC-50	GAPDH	13.506		SIRNA-1-50	GAPDH	11.246		SIRNA-1-50	GAPDH	11.246		SIRNA-1-50	GAPDH	11.246
B1	SIRNA-1-50	PTGS1-1	24.423		NC-100	PTGS1-1	24.662		SIRNA-1-50	GAPDH	11.461		SIRNA-1-50	GAPDH	11.461		SIRNA-1-50	GAPDH	11.461
B2	SIRNA-1-50	PTGS1-1	24.5		NC-100	PTGS1-1	24.531		SIRNA-2-50	PTGS1-1	24.45		SIRNA-2-50	PTGS1-2	23.981		SIRNA-2-50	PTGS1-3	24.243
B3	SIRNA-1-50	PTGS1-1	24.391		NC-100	PTGS1-1	24.483		SIRNA-2-50	PTGS1-1	24.436		SIRNA-2-50	PTGS1-2	24.018		SIRNA-2-50	PTGS1-3	24.351
B4	SIRNA-1-50	PTGS1-2	24.084		NC-100	PTGS1-2	24.045		SIRNA-2-50	PTGS1-1	24.387		SIRNA-2-50	PTGS1-2	24.064		SIRNA-2-50	PTGS1-3	24.295
B5	SIRNA-1-50	PTGS1-2	24.04		NC-100	PTGS1-2	23.986		SIRNA-2-50	GAPDH	11.435		SIRNA-2-50	GAPDH	11.435		SIRNA-2-50	GAPDH	11.435
B6	SIRNA-1-50	PTGS1-2	24.029		NC-100	PTGS1-2	24.007		SIRNA-2-50	GAPDH	11.492		SIRNA-2-50	GAPDH	11.492		SIRNA-2-50	GAPDH	11.492
B7	SIRNA-1-50	PTGS1-3	24.358		NC-100	PTGS1-3	24.008		SIRNA-2-50	GAPDH	11.473		SIRNA-2-50	GAPDH	11.473		SIRNA-2-50	GAPDH	11.473
B8	SIRNA-1-50	PTGS1-3	24.439		NC-100	PTGS1-3	24.06		SIRNA-3-50	PTGS1-1	24.494		SIRNA-3-50	PTGS1-2	23.748		SIRNA-3-50	PTGS1-3	23.984
B9	SIRNA-1-50	PTGS1-3	24.464		NC-100	PTGS1-3	23.968		SIRNA-3-50	PTGS1-1	24.342		SIRNA-3-50	PTGS1-2	23.734		SIRNA-3-50	PTGS1-3	24.036
B10	SIRNA-1-50	GAPDH	11.168		NC-100	GAPDH	11.072		SIRNA-3-50	PTGS1-1	24.418		SIRNA-3-50	PTGS1-2	23.765		SIRNA-3-50	PTGS1-3	23.947
B11	SIRNA-1-50	GAPDH	11.246		NC-100	GAPDH	11.162		SIRNA-3-50	GAPDH	11.295		SIRNA-3-50	GAPDH	11.295		SIRNA-3-50	GAPDH	11.295
B12	SIRNA-1-50	GAPDH	11.461		NC-100	GAPDH	11.233		SIRNA-3-50	GAPDH	11.129		SIRNA-3-50	GAPDH	11.129		SIRNA-3-50	GAPDH	11.129
C1	SIRNA-2-50	PTGS1-1	24.45						SIRNA-3-50	GAPDH	11.221		SIRNA-3-50	GAPDH	11.221		SIRNA-3-50	GAPDH	11.221
C2	SIRNA-2-50	PTGS1-1	24.436
C3	SIRNA-2-50	PTGS1-1	24.387						SIRNA-1-100	PTGS1-1	24.912		SIRNA-1-100	PTGS1-2	24.154		SIRNA-1-100	PTGS1-3	24.43
C4	SIRNA-2-50	PTGS1-2	23.981						SIRNA-1-100	PTGS1-1	24.786		SIRNA-1-100	PTGS1-2	24.135		SIRNA-1-100	PTGS1-3	24.466
C5	SIRNA-2-50	PTGS1-2	24.018						SIRNA-1-100	PTGS1-1	24.924		SIRNA-1-100	PTGS1-2	24.313		SIRNA-1-100	PTGS1-3	24.341
C6	SIRNA-2-50	PTGS1-2	24.064						SIRNA-1-100	GAPDH	11.549		SIRNA-1-100	GAPDH	11.549		SIRNA-1-100	GAPDH	11.549
C7	SIRNA-2-50	PTGS1-3	24.243						SIRNA-1-100	GAPDH	11.734		SIRNA-1-100	GAPDH	11.734		SIRNA-1-100	GAPDH	11.734
C8	SIRNA-2-50	PTGS1-3	24.351						SIRNA-1-100	GAPDH	11.675		SIRNA-1-100	GAPDH	11.675		SIRNA-1-100	GAPDH	11.675
C9	SIRNA-2-50	PTGS1-3	24.295						SIRNA-2-100	PTGS1-1	25.019		SIRNA-2-100	PTGS1-2	23.946		SIRNA-2-100	PTGS1-3	24.197
C10	SIRNA-2-50	GAPDH	11.435						SIRNA-2-100	PTGS1-1	24.866		SIRNA-2-100	PTGS1-2	24.07		SIRNA-2-100	PTGS1-3	24.15
C11	SIRNA-2-50	GAPDH	11.492						SIRNA-2-100	PTGS1-1	24.934		SIRNA-2-100	PTGS1-2	24.01		SIRNA-2-100	PTGS1-3	24.198
C12	SIRNA-2-50	GAPDH	11.473						SIRNA-2-100	GAPDH	11.684		SIRNA-2-100	GAPDH	11.684		SIRNA-2-100	GAPDH	11.684
D1	SIRNA-3-50	PTGS1-1	24.494						SIRNA-2-100	GAPDH	11.882		SIRNA-2-100	GAPDH	11.882		SIRNA-2-100	GAPDH	11.882
D2	SIRNA-3-50	PTGS1-1	24.342						SIRNA-2-100	GAPDH	11.706		SIRNA-2-100	GAPDH	11.706		SIRNA-2-100	GAPDH	11.706
D3	SIRNA-3-50	PTGS1-1	24.418						SIRNA-3-100	PTGS1-1	25.28		SIRNA-3-100	PTGS1-2	23.895		SIRNA-3-100	PTGS1-3	24.067
D4	SIRNA-3-50	PTGS1-2	23.748						SIRNA-3-100	PTGS1-1	24.739		SIRNA-3-100	PTGS1-2	23.961		SIRNA-3-100	PTGS1-3	24.055
D5	SIRNA-3-50	PTGS1-2	23.734						SIRNA-3-100	PTGS1-1	24.719		SIRNA-3-100	PTGS1-2	23.85		SIRNA-3-100	PTGS1-3	24.124
D6	SIRNA-3-50	PTGS1-2	23.765						SIRNA-3-100	GAPDH	11.406		SIRNA-3-100	GAPDH	11.406		SIRNA-3-100	GAPDH	11.406
D7	SIRNA-3-50	PTGS1-3	23.984						SIRNA-3-100	GAPDH	11.445		SIRNA-3-100	GAPDH	11.445		SIRNA-3-100	GAPDH	11.445
D8	SIRNA-3-50	PTGS1-3	24.036						SIRNA-3-100	GAPDH	11.546		SIRNA-3-100	GAPDH	11.546		SIRNA-3-100	GAPDH	11.546
D9	SIRNA-3-50	PTGS1-3	23.947
D10	SIRNA-3-50	GAPDH	11.295
D11	SIRNA-3-50	GAPDH	11.129
D12	SIRNA-3-50	GAPDH	11.221
E1	NC-100	PTGS1-1	24.662
E2	NC-100	PTGS1-1	24.531
E3	NC-100	PTGS1-1	24.483
E4	NC-100	PTGS1-2	24.045
E5	NC-100	PTGS1-2	23.986
E6	NC-100	PTGS1-2	24.007
E7	NC-100	PTGS1-3	24.008
E8	NC-100	PTGS1-3	24.06
E9	NC-100	PTGS1-3	23.968
E10	NC-100	GAPDH	11.072
E11	NC-100	GAPDH	11.162
E12	NC-100	GAPDH	11.233
F1	SIRNA-1-100	PTGS1-1	24.912
F2	SIRNA-1-100	PTGS1-1	24.786
F3	SIRNA-1-100	PTGS1-1	24.924
F4	SIRNA-1-100	PTGS1-2	24.154
F5	SIRNA-1-100	PTGS1-2	24.135
F6	SIRNA-1-100	PTGS1-2	24.313
F7	SIRNA-1-100	PTGS1-3	24.43
F8	SIRNA-1-100	PTGS1-3	24.466
F9	SIRNA-1-100	PTGS1-3	24.341
F10	SIRNA-1-100	GAPDH	11.549
F11	SIRNA-1-100	GAPDH	11.734
F12	SIRNA-1-100	GAPDH	11.675
G1	SIRNA-2-100	PTGS1-1	25.019
G2	SIRNA-2-100	PTGS1-1	24.866
G3	SIRNA-2-100	PTGS1-1	24.934
G4	SIRNA-2-100	PTGS1-2	23.946
G5	SIRNA-2-100	PTGS1-2	24.07
G6	SIRNA-2-100	PTGS1-2	24.01
G7	SIRNA-2-100	PTGS1-3	24.197
G8	SIRNA-2-100	PTGS1-3	24.15
G9	SIRNA-2-100	PTGS1-3	24.198
G10	SIRNA-2-100	GAPDH	11.684
G11	SIRNA-2-100	GAPDH	11.882
G12	SIRNA-2-100	GAPDH	11.706
H1	SIRNA-3-100	PTGS1-1	25.28
H2	SIRNA-3-100	PTGS1-1	24.739
H3	SIRNA-3-100	PTGS1-1	24.719
H4	SIRNA-3-100	PTGS1-2	23.895
H5	SIRNA-3-100	PTGS1-2	23.961
H6	SIRNA-3-100	PTGS1-2	23.85
H7	SIRNA-3-100	PTGS1-3	24.067
H8	SIRNA-3-100	PTGS1-3	24.055
H9	SIRNA-3-100	PTGS1-3	24.124
H10	SIRNA-3-100	GAPDH	11.406
H11	SIRNA-3-100	GAPDH	11.445
H12	SIRNA-3-100	GAPDH	11.546

## Sheet: 2-ΔCт模版  2 C做对照
Well	Well Position	Sample Name	Target Name	CT	Ct Mean	Ct SD					Sample Name	Target Name	CT	Ct Mean	ΔCт	mean	ΔΔCT	2-ΔΔCт	mean	相对量计算	mean	SD
1	A1	5.23EV71 C1	GAPDH	10.41	9.111	1.167					5.23EV71 C1	GAPDH	10.41	9.111
2	A2	5.23EV71 C1	GAPDH	8.773	9.111	1.167					5.23EV71 C1	GAPDH	8.773
3	A3	5.23EV71 C1	GAPDH	8.15	9.111	1.167					5.23EV71 C1	GAPDH	8.15
4	A4	5.23EV71 C1	VP1	22.708	22.725	0.015					5.23EV71 C1	VP1	22.708	22.725	13.597	13.614	-0.017	1.01185		1.26234e-05	1.2476e-05	1.28334e-07
5	A5	5.23EV71 C1	VP1	22.735	22.725	0.015					5.23EV71 C1	VP1	22.735		13.624		0.01	0.993092		1.23894e-05
6	A6	5.23EV71 C1	VP1	22.732	22.725	0.015					5.23EV71 C1	VP1	22.732		13.621		0.007	0.99516		1.24152e-05
7	A7	5.23EV71 V1	GAPDH	11.565	11.412	0.17					5.23EV71 V1	GAPDH	11.565	11.4113
8	A8	5.23EV71 V1	GAPDH	11.44	11.412	0.17					5.23EV71 V1	GAPDH	11.44
9	A9	5.23EV71 V1	GAPDH	11.229	11.412	0.17					5.23EV71 V1	GAPDH	11.229
10	A10	5.23EV71 V1	VP1	8.766	8.735	0.03					5.23EV71 V1	VP1	8.766	8.735	-2.64533		-16.2593	78441.7	80156.7	0.978604	1	0.0204942
11	A11	5.23EV71 V1	VP1	8.732	8.735	0.03					5.23EV71 V1	VP1	8.732		-2.67933		-16.2933	80312.3		1.00194
12	A12	5.23EV71 V1	VP1	8.707	8.735	0.03					5.23EV71 V1	VP1	8.707		-2.70433		-16.3183	81716.1		1.01945
13	B1	5.23EV71 46-20	GAPDH	11.557	11.457	0.097					5.23EV71 46-6	GAPDH	11.857	11.862
14	B2	5.23EV71 46-20	GAPDH	11.363	11.457	0.097					5.23EV71 46-6	GAPDH	11.844
15	B3	5.23EV71 46-20	GAPDH	11.451	11.457	0.097					5.23EV71 46-6	GAPDH	11.885
16	B4	5.23EV71 46-20	VP1	13.52	13.543	0.086					5.23EV71 46-6	VP1	9.224	9.23267	-2.638		-16.252	78044		0.973643	0.96782	0.00504258
17	B5	5.23EV71 46-20	VP1	13.637	13.543	0.086					5.23EV71 46-6	VP1	9.237		-2.625		-16.239	77343.9		0.964909
18	B6	5.23EV71 46-20	VP1	13.471	13.543	0.086					5.23EV71 46-6	VP1	9.237		-2.625		-16.239	77343.9		0.964909
19	B7	5.23EV71 46-4	GAPDH	11.254	11.117	0.12					5.23EV71 46-32	GAPDH	11.343	11.3093
20	B8	5.23EV71 46-4	GAPDH	11.063	11.117	0.12					5.23EV71 46-32	GAPDH	11.352
21	B9	5.23EV71 46-4	GAPDH	11.033	11.117	0.12					5.23EV71 46-32	GAPDH	11.233
22	B10	5.23EV71 46-4	VP1	13.202	13.142	0.064					5.23EV71 46-32	VP1	9.246	9.232	-2.06333		-15.6773	52402		0.653744	0.660147	0.0075054
23	B11	5.23EV71 46-4	VP1	13.075	13.142	0.064					5.23EV71 46-32	VP1	9.236		-2.07333		-15.6873	52766.5		0.658291
24	B12	5.23EV71 46-4	VP1	13.15	13.142	0.064					5.23EV71 46-32	VP1	9.214		-2.09533		-15.7093	53577.3		0.668406
25	C1	5.23EV71 46-800	GAPDH	10.924	10.914	0.086					5.23EV71 46-160	GAPDH	11.108	11.0677
26	C2	5.23EV71 46-800	GAPDH	10.994	10.914	0.086					5.23EV71 46-160	GAPDH	11.107
27	C3	5.23EV71 46-800	GAPDH	10.823	10.914	0.086					5.23EV71 46-160	GAPDH	10.988
28	C4	5.23EV71 46-800	VP1	13.281	13.226	0.095					5.23EV71 46-160	VP1	11.622	11.628	0.554333		-13.0597	8537.91		0.106515	0.106088	0.00215986
29	C5	5.23EV71 46-800	VP1	13.279	13.226	0.095					5.23EV71 46-160	VP1	11.66		0.592333		-13.0217	8315.96		0.103746
30	C6	5.23EV71 46-800	VP1	13.116	13.226	0.095					5.23EV71 46-160	VP1	11.602		0.534333		-13.0797	8657.09		0.108002
31	C7	5.23EV71 46-160	GAPDH	11.108	11.067	0.069					5.23EV71 46-800	GAPDH	10.924	10.9137
32	C8	5.23EV71 46-160	GAPDH	11.107	11.067	0.069					5.23EV71 46-800	GAPDH	10.994
33	C9	5.23EV71 46-160	GAPDH	10.988	11.067	0.069					5.23EV71 46-800	GAPDH	10.823
34	C10	5.23EV71 46-160	VP1	11.622	11.628	0.03					5.23EV71 46-800	VP1	13.281	13.2253	2.36733		-11.2467	2429.88		0.0303141	0.0315524	0.00210859
35	C11	5.23EV71 46-160	VP1	11.66	11.628	0.03					5.23EV71 46-800	VP1	13.279		2.36533		-11.2487	2433.25		0.0303561
36	C12	5.23EV71 46-160	VP1	11.602	11.628	0.03					5.23EV71 46-800	VP1	13.116		2.20233		-11.4117	2724.29		0.0339871
37	D1	5.23EV71 46-32	GAPDH	11.343	11.309	0.066					5.23EV71 46-4	GAPDH	11.254	11.1167
38	D2	5.23EV71 46-32	GAPDH	11.352	11.309	0.066					5.23EV71 46-4	GAPDH	11.063
39	D3	5.23EV71 46-32	GAPDH	11.233	11.309	0.066					5.23EV71 46-4	GAPDH	11.033
40	D4	5.23EV71 46-32	VP1	9.246	9.232	0.016					5.23EV71 46-4	VP1	13.202	13.1423	2.08533		-11.5287	2954.44		0.0368582	0.0384397	0.00170739
41	D5	5.23EV71 46-32	VP1	9.236	9.232	0.016					5.23EV71 46-4	VP1	13.075		1.95833		-11.6557	3226.3		0.04025
42	D6	5.23EV71 46-32	VP1	9.214	9.232	0.016					5.23EV71 46-4	VP1	13.15		2.03333		-11.5807	3062.87		0.038211
43	D7	5.23EV71 46-6	GAPDH	11.857	11.862	0.021					5.23EV71 46-20	GAPDH	11.557	11.457
44	D8	5.23EV71 46-6	GAPDH	11.844	11.862	0.021					5.23EV71 46-20	GAPDH	11.363
45	D9	5.23EV71 46-6	GAPDH	11.885	11.862	0.021					5.23EV71 46-20	GAPDH	11.451
46	D10	5.23EV71 46-6	VP1	9.224	9.233	0.007					5.23EV71 46-20	VP1	13.52	13.5427	2.063		-11.551	3000.53		0.0374333	0.0368924	0.00215608
47	D11	5.23EV71 46-6	VP1	9.237	9.233	0.007					5.23EV71 46-20	VP1	13.637		2.18		-11.434	2766.79		0.0345173
48	D12	5.23EV71 46-6	VP1	9.237	9.233	0.007					5.23EV71 46-20	VP1	13.471		2.014		-11.6	3104.19		0.0387265
49	E1											GAPDH		#DIV/0!
50	E2											GAPDH
51	E3											GAPDH
52	E4											VP1		#DIV/0!	#DIV/0!		#DIV/0!	#DIV/0!		#DIV/0!	#DIV/0!	#DIV/0!
53	E5											VP1			#DIV/0!		#DIV/0!	#DIV/0!		#DIV/0!
54	E6											VP1			#DIV/0!		#DIV/0!	#DIV/0!		#DIV/0!
55	E7											GAPDH		#DIV/0!
56	E8											GAPDH
57	E9											GAPDH
58	E10											VP1		#DIV/0!	#DIV/0!		#DIV/0!	#DIV/0!		#DIV/0!	#DIV/0!	#DIV/0!
59	E11											VP1			#DIV/0!		#DIV/0!	#DIV/0!		#DIV/0!
60	E12											VP1			#DIV/0!		#DIV/0!	#DIV/0!		#DIV/0!
61	F1											GAPDH		#DIV/0!
62	F2											GAPDH
63	F3											GAPDH
64	F4											VP1		#DIV/0!	#DIV/0!		#DIV/0!	#DIV/0!		#DIV/0!	#DIV/0!	#DIV/0!
65	F5											VP1			#DIV/0!		#DIV/0!	#DIV/0!		#DIV/0!
66	F6											VP1			#DIV/0!		#DIV/0!	#DIV/0!		#DIV/0!
67	F7											GAPDH		#DIV/0!
68	F8											GAPDH
69	F9											GAPDH
70	F10											VP1		#DIV/0!	#DIV/0!		#DIV/0!	#DIV/0!		#DIV/0!	#DIV/0!	#DIV/0!
71	F11											VP1			#DIV/0!		#DIV/0!	#DIV/0!		#DIV/0!
72	F12											VP1			#DIV/0!		#DIV/0!	#DIV/0!		#DIV/0!
73	G1											GAPDH		#DIV/0!
74	G2											GAPDH
75	G3											GAPDH
76	G4											VP1		#DIV/0!	#DIV/0!		#DIV/0!	#DIV/0!		#DIV/0!	#DIV/0!	#DIV/0!
77	G5											VP1			#DIV/0!		#DIV/0!	#DIV/0!		#DIV/0!
78	G6											VP1			#DIV/0!		#DIV/0!	#DIV/0!		#DIV/0!
79	G7											GAPDH		#DIV/0!
80	G8											GAPDH
81	G9											GAPDH
82	G10											VP1		#DIV/0!	#DIV/0!		#DIV/0!	#DIV/0!		#DIV/0!	#DIV/0!	#DIV/0!
83	G11											VP1			#DIV/0!		#DIV/0!	#DIV/0!		#DIV/0!
84	G12											VP1			#DIV/0!		#DIV/0!	#DIV/0!		#DIV/0!
85	H1											GAPDH		#DIV/0!
86	H2											GAPDH
87	H3											GAPDH
88	H4											VP1		#DIV/0!	#DIV/0!		#DIV/0!	#DIV/0!		#DIV/0!	#DIV/0!	#DIV/0!
89	H5											VP1			#DIV/0!		#DIV/0!	#DIV/0!		#DIV/0!
90	H6											VP1			#DIV/0!		#DIV/0!	#DIV/0!		#DIV/0!
91	H7											GAPDH		#DIV/0!
92	H8											GAPDH
93	H9											GAPDH
94	H10											VP1		#DIV/0!	#DIV/0!		#DIV/0!	#DIV/0!		#DIV/0!	#DIV/0!	#DIV/0!
95	H11											VP1			#DIV/0!		#DIV/0!	#DIV/0!		#DIV/0!
96	H12											VP1			#DIV/0!		#DIV/0!	#DIV/0!		#DIV/0!
Analysis Type = Singleplex
Endogenous Control = ACTIN
RQ Min/Max Confidence Level = 95.0
Reference Sample = EV71016160NM

## Sheet: 常用 2-ΔCт模版  2 V作对照
Well	Well Position	Sample Name	Target Name	CT	Ct Mean	Ct SD			Sample Name	Target Name	CT	mean	ΔCT		ΔΔCT	2-ΔΔCT	mean	SD
1	A1	5.23EV71 C1	GAPDH	10.41	9.111	1.167			5.23EV71 C1	GAPDH	10.41	9.111
2	A2	5.23EV71 C1	GAPDH	8.773	9.111	1.167			5.23EV71 C1	GAPDH	8.773
3	A3	5.23EV71 C1	GAPDH	8.15	9.111	1.167			5.23EV71 C1	GAPDH	8.15
4	A4	5.23EV71 C1	VP1	22.708	22.725	0.015			5.23EV71 C1	VP1	22.708	22.725	13.597		16.2733	1.26252e-05	1.24778e-05	1.28352e-07
5	A5	5.23EV71 C1	VP1	22.735	22.725	0.015			5.23EV71 C1	VP1	22.735		13.624		16.3003	1.23911e-05
6	A6	5.23EV71 C1	VP1	22.732	22.725	0.015			5.23EV71 C1	VP1	22.732		13.621		16.2973	1.24169e-05
7	A7	5.23EV71 V1	GAPDH	11.565	11.412	0.17			5.23EV71 V1	GAPDH	11.565	11.4113
8	A8	5.23EV71 V1	GAPDH	11.44	11.412	0.17			5.23EV71 V1	GAPDH	11.44
9	A9	5.23EV71 V1	GAPDH	11.229	11.412	0.17			5.23EV71 V1	GAPDH	11.229
10	A10	5.23EV71 V1	VP1	8.766	8.735	0.03			5.23EV71 V1	VP1	8.766	8.735	-2.64533	-2.67633	0.031	0.978742	1.00014	0.0204971
11	A11	5.23EV71 V1	VP1	8.732	8.735	0.03			5.23EV71 V1	VP1	8.732		-2.67933		-0.003	1.00208
12	A12	5.23EV71 V1	VP1	8.707	8.735	0.03			5.23EV71 V1	VP1	8.707		-2.70433		-0.028	1.0196
13	B1	5.23EV71 46-20	GAPDH	11.557	11.457	0.097			5.23EV71 46-6	GAPDH	11.857	11.862
14	B2	5.23EV71 46-20	GAPDH	11.363	11.457	0.097			5.23EV71 46-6	GAPDH	11.844
15	B3	5.23EV71 46-20	GAPDH	11.451	11.457	0.097			5.23EV71 46-6	GAPDH	11.885
16	B4	5.23EV71 46-20	VP1	13.52	13.543	0.086			5.23EV71 46-6	VP1	9.224	9.23267	-2.638		0.0383333	0.973779	0.967956	0.00504328
17	B5	5.23EV71 46-20	VP1	13.637	13.543	0.086			5.23EV71 46-6	VP1	9.237		-2.625		0.0513333	0.965044
18	B6	5.23EV71 46-20	VP1	13.471	13.543	0.086			5.23EV71 46-6	VP1	9.237		-2.625		0.0513333	0.965044
19	B7	5.23EV71 46-4	GAPDH	11.254	11.117	0.12			5.23EV71 46-32	GAPDH	11.343	11.3093
20	B8	5.23EV71 46-4	GAPDH	11.063	11.117	0.12			5.23EV71 46-32	GAPDH	11.352
21	B9	5.23EV71 46-4	GAPDH	11.033	11.117	0.12			5.23EV71 46-32	GAPDH	11.233
22	B10	5.23EV71 46-4	VP1	13.202	13.142	0.064			5.23EV71 46-32	VP1	9.246	9.232	-2.06333		0.613	0.653836	0.66024	0.00750646
23	B11	5.23EV71 46-4	VP1	13.075	13.142	0.064			5.23EV71 46-32	VP1	9.236		-2.07333		0.603	0.658383
24	B12	5.23EV71 46-4	VP1	13.15	13.142	0.064			5.23EV71 46-32	VP1	9.214		-2.09533		0.581	0.6685
25	C1	5.23EV71 46-800	GAPDH	10.924	10.914	0.086			5.23EV71 46-160	GAPDH	11.108	11.0677
26	C2	5.23EV71 46-800	GAPDH	10.994	10.914	0.086			5.23EV71 46-160	GAPDH	11.107
27	C3	5.23EV71 46-800	GAPDH	10.823	10.914	0.086			5.23EV71 46-160	GAPDH	10.988
28	C4	5.23EV71 46-800	VP1	13.281	13.226	0.095			5.23EV71 46-160	VP1	11.622	11.628	0.554333		3.23067	0.10653	0.106103	0.00216017
29	C5	5.23EV71 46-800	VP1	13.279	13.226	0.095			5.23EV71 46-160	VP1	11.66		0.592333		3.26867	0.103761
30	C6	5.23EV71 46-800	VP1	13.116	13.226	0.095			5.23EV71 46-160	VP1	11.602		0.534333		3.21067	0.108017
31	C7	5.23EV71 46-160	GAPDH	11.108	11.067	0.069			5.23EV71 46-800	GAPDH	10.924	10.9137
32	C8	5.23EV71 46-160	GAPDH	11.107	11.067	0.069			5.23EV71 46-800	GAPDH	10.994
33	C9	5.23EV71 46-160	GAPDH	10.988	11.067	0.069			5.23EV71 46-800	GAPDH	10.823
34	C10	5.23EV71 46-160	VP1	11.622	11.628	0.03			5.23EV71 46-800	VP1	13.281	13.2253	2.36733		5.04367	0.0303183	0.0315569	0.00210889
35	C11	5.23EV71 46-160	VP1	11.66	11.628	0.03			5.23EV71 46-800	VP1	13.279		2.36533		5.04167	0.0303604
36	C12	5.23EV71 46-160	VP1	11.602	11.628	0.03			5.23EV71 46-800	VP1	13.116		2.20233		4.87867	0.0339919
37	D1	5.23EV71 46-32	GAPDH	11.343	11.309	0.066			5.23EV71 46-4	GAPDH	11.254	11.1167
38	D2	5.23EV71 46-32	GAPDH	11.352	11.309	0.066			5.23EV71 46-4	GAPDH	11.063
39	D3	5.23EV71 46-32	GAPDH	11.233	11.309	0.066			5.23EV71 46-4	GAPDH	11.033
40	D4	5.23EV71 46-32	VP1	9.246	9.232	0.016			5.23EV71 46-4	VP1	13.202	13.1423	2.08533		4.76167	0.0368634	0.0384451	0.00170763
41	D5	5.23EV71 46-32	VP1	9.236	9.232	0.016			5.23EV71 46-4	VP1	13.075		1.95833		4.63467	0.0402556
42	D6	5.23EV71 46-32	VP1	9.214	9.232	0.016			5.23EV71 46-4	VP1	13.15		2.03333		4.70967	0.0382163
43	D7	5.23EV71 46-6	GAPDH	11.857	11.862	0.021			5.23EV71 46-20	GAPDH	11.557	11.457
44	D8	5.23EV71 46-6	GAPDH	11.844	11.862	0.021			5.23EV71 46-20	GAPDH	11.363
45	D9	5.23EV71 46-6	GAPDH	11.885	11.862	0.021			5.23EV71 46-20	GAPDH	11.451
46	D10	5.23EV71 46-6	VP1	9.224	9.233	0.007			5.23EV71 46-20	VP1	13.52	13.5427	2.063		4.73933	0.0374385	0.0368975	0.00215639
47	D11	5.23EV71 46-6	VP1	9.237	9.233	0.007			5.23EV71 46-20	VP1	13.637		2.18		4.85633	0.0345222
48	D12	5.23EV71 46-6	VP1	9.237	9.233	0.007			5.23EV71 46-20	VP1	13.471		2.014		4.69033	0.0387319
										GAPDH		#DIV/0!
										GAPDH
										GAPDH
										VP1		#DIV/0!	#DIV/0!		#DIV/0!	#DIV/0!	#DIV/0!	#DIV/0!
										VP1			#DIV/0!		#DIV/0!	#DIV/0!
										VP1			#DIV/0!		#DIV/0!	#DIV/0!
										GAPDH		#DIV/0!
										GAPDH
										GAPDH
										VP1		#DIV/0!	#DIV/0!		#DIV/0!	#DIV/0!	#DIV/0!	#DIV/0!
										VP1			#DIV/0!		#DIV/0!	#DIV/0!
										VP1			#DIV/0!		#DIV/0!	#DIV/0!
										GAPDH		#DIV/0!
										GAPDH
										GAPDH
										VP1		#DIV/0!	#DIV/0!		#DIV/0!	#DIV/0!	#DIV/0!	#DIV/0!
										VP1			#DIV/0!		#DIV/0!	#DIV/0!
										VP1			#DIV/0!		#DIV/0!	#DIV/0!
										GAPDH		#DIV/0!
										GAPDH
										GAPDH
										VP1		#DIV/0!	#DIV/0!		#DIV/0!	#DIV/0!	#DIV/0!	#DIV/0!
										VP1			#DIV/0!		#DIV/0!	#DIV/0!
										VP1			#DIV/0!		#DIV/0!	#DIV/0!
										GAPDH		#DIV/0!
										GAPDH
										GAPDH
										VP1		#DIV/0!	#DIV/0!		#DIV/0!	#DIV/0!	#DIV/0!	#DIV/0!
										VP1			#DIV/0!		#DIV/0!	#DIV/0!
										VP1			#DIV/0!		#DIV/0!	#DIV/0!
										GAPDH		#DIV/0!
										GAPDH
										GAPDH
										VP1		#DIV/0!	#DIV/0!		#DIV/0!	#DIV/0!	#DIV/0!	#DIV/0!
										VP1			#DIV/0!		#DIV/0!	#DIV/0!
										VP1			#DIV/0!		#DIV/0!	#DIV/0!
										GAPDH		#DIV/0!
										GAPDH
										GAPDH
										VP1		#DIV/0!	#DIV/0!		#DIV/0!	#DIV/0!	#DIV/0!	#DIV/0!
										VP1			#DIV/0!		#DIV/0!	#DIV/0!
										VP1			#DIV/0!		#DIV/0!	#DIV/0!
										GAPDH		#DIV/0!
										GAPDH
										GAPDH
										VP1		#DIV/0!	#DIV/0!		#DIV/0!	#DIV/0!	#DIV/0!	#DIV/0!
										VP1			#DIV/0!		#DIV/0!	#DIV/0!
										VP1			#DIV/0!		#DIV/0!	#DIV/0!
